# Supplementary material for: Genetic spectrum among Iranian individuals with neuromuscular disorders using Next-Generation Sequencing and multiple ligation-dependent probe amplification methods: An 11-year overview
Source: Research Square preprint supplement (doi:10.21203/rs.3.rs-6612638/v1), 2025-06-10
Supplement: Supplementary file 1 [file db4c4aa4b5560d4241aeb74d.xlsx]

## Sheet: Table1
Table1. Individual's detailed information (Clinical data, NGS results, and identified variants)
	Family ID	Reason For Referral	Testing Strategy*	Type Of Test	Consanguinty**	Family History***	Gender	Age at report	Age group at Report	Age group (based on age of onset)	Patients description	Phenotypic group	Gene Symbol	Mutation Type	MutatioNovel Status	Genomic Position	Zygosity	Transcript	cDNA	Protein	OMIM Phenotype	Inheritance mode	ACMG Classification****	ACMG Evidence	Segregation status*****	Final Result	PMID	Date	Tests performed before NGS	Is CNV confirmed?	ClinVar Accession Number
Case1	6275	LGMD	Solo	whole exome sequencing	No	Negative	Male	48 Y	Adulthood	Adulthood	Onset at the age of 24-year old with imbalance gait; Difficulty rising from seated position & climbing steps; Muscle weakness & atrophy, upper & lower limbs, pelvic and shoulder girdle; Limited elbow & knee flexion; Pes cavus; Areflexia; Elevated level of CPK; EMG suggestive of LGMD, inclusion body myopathy, and polymyositis.	Myopathies	GNE	Missense	Known	Chr9:36246115G>A	Potential Compound Heterozygote	NM_001128227.3	c.622C>T	p.Arg208Cys	Nonaka myopathy [#MIM:605820] AR; Sialuria [#MIM:269921] AD	Autosomal Recessive	Likely Pathogenic	PM1,PM2,PP3,PP5	Not checked	Positive	PMID: 25986339, 24027297	2022-01-01	Whole exome sequencing (WES) was previously performed in BGI clinical laboratories which revealed two heterozygous variant in the GNE gene defined as: c.829C>T (p.Arg277Trp) and c.622C>T (p.Arg208Cys). In the following, segregation analysis of the identified variants was investigated in Ronagene medical genetics laboratory to rule out the phase (cis/trans) of these variants. The c.829C>T variant …	___	___
														Missense	Known	Chr9:36236862G>A	Potential Compound Heterozygote	NM_001128227.3	c.829C>T	p.Arg277Trp			Pathogenic	PM1,PM2,PM5,PP3,PP5			PMID: 15987957, 22507750, 21307865, 24136589, 12409274		Whole exome sequencing (WES) was previously performed in BGI clinical laboratories which revealed two heterozygous variant in the GNE gene defined as: c.829C>T (p.Arg277Trp) and c.622C>T (p.Arg208Cys). In the following, segregation analysis of the identified variants was investigated in Ronagene medical genetics laboratory to rule out the phase (cis/trans) of these variants. The c.829C>T variant …	___	___
Case2	9304	Hereditary paraplagia	Solo	whole exome sequencing	Yes	Negative	Male	31 Y	Adulthood	Adulthood	Onset at the age of 21-year with lower limb weakness; Abnormal gait, ataxic & spastic; Dysarthria; Spastic paraparesis.	Overlapping	KIF1A	Missense	Novel	Chr2:241680752C>T	Homozygote	NM_004321.8	c.3380G>A	p.Gly1127Glu	NESCAV syndrome [#MIM:614255] AD; Neuropathy, hereditary sensory, type IIC [#MIM:614213] AR; Spastic paraplegia 30, autosomal dominant [#MIM:610357] AD, AR; Spastic paraplegia 30, autosomal recessive [#MIM:610357] AD, AR	Autosomal Recessive	VUS	PM2, PP2?, PP3	Inherited	VUS	___	2022-01-22	No	___	___
												Hereditary Paraplegia	SPG7	Stop gain	Known	Chr16:89576947T>A	Homozygote	NM_003119.4	c.233T>A	p.Leu78*	Spastic paraplegia 7, autosomal recessive [#MIM:607259] AD, AR		Likely Pathogenic	___			PMID: 18200586, 22571692, 22571692, 24727571			___	___
Case3	9337	Myopathy	Solo	whole exome sequencing	Yes	Negative	Female	33 Y	Adulthood	Adulthood	Onset at the age of 26-year old with lower muscle weakness & difficulty climbing steps; Foot drop; Upper limbs proximal muscle weakness; Mild lordosis; Lower muscle cramp; Abnormal gait; Elevated CPK, SGOT & SGPT; EMG-NCV: non-irritable myopathy.	Myopathies	GAA	Stop gain	Known	Chr17:78092467G>T	Potential Compound Heterozygote	NM_000152.5	c.2662G>T	p.Glu888*	Glycogen storage disease II [MIM#232300] AR	Autosomal Recessive	Pathogenic	PVS1, PM2, PM3, PP4	Not checked	Positive	PMID: 31743840; 16531044; 18458862; etc	2022-08-19	No	___	___
														Splicing	Known	Chr17:78078341T>G	Potential Compound Heterozygote	NM_000152.5	c.-32-13T>G	___			Pathogenic	PM3_Very Strong, PS3_Moderate, PP4_Moderate			PMID: 7881425, 21439876, 26231297, 24245577			___	___
Case4	9474	LGMD	Solo	whole exome sequencing	Yes	Negative	Male	6 Y	Childhood	Childhood	Difficulty climbing steps; Developmental delay, motor; Muscle weakness; Muscle biopsy: congenital fiber type disproportion; IHC: sarcolemma labelling with all examined antibodies; EMG-NCV: compatible with myopathic process of proximal & distal muscle weakness.	Myopathies	RYR1	Frameshift	Novel	Chr19:39034456TG>T	Potential Compound Heterozygote	NM_000540.3	c.11956del	p.Asp3986Thrfs*13	Central core disease [#MIM:117000]/ AD, AR; King-Denborough syndrome [#MIM:619542]/ AD; Minicore myopathy with external ophthalmoplegia 255320 AR; Neuromuscular disease, congenital, with uniform type 1 fiber [#MIM:117000]/ AD, AR; {Malignant hyperthermia susceptibility 1} [#MIM:145600]/ AD	Autosomal Recessive	Likely Pathogenic	PM2	Not checked	Positive	___	2022-10-02	No	___	___
														Missense	Novel	Chr19:39009884G>A	Potential Compound Heterozygote	NM_000540.3	c.10049G>A	p.Arg3350Gln			Likely Pathogenic	PVS1, PM2			___			___	___
Case5	9648	Brown-Vialetto-Van Laere (BVVL) syndrome	Solo	whole exome sequencing	No	Negative	Female	15 Y	Childhood	Childhood	Onset at the age of 14-year old with GI problem including dysphagia, nausea and weight loss; Sensorineural hearing loss; Hand tremor; Atrophy of thenar and hypothenar; Mild generalized muscle weakness; EMG-NCV: motor neuron disease.	Motor Neuron Disease	SLC52A2	Frameshift	Novel	Chr8:145584533GCG>GT	Potential Compound Heterozygote	NM_024531.5	c.1197_1198delinsT	p.Gly401Alafs*88	Brown-Vialetto-Van Laere syndrome 2; #MIM614707, AR	Autosomal Recessive	Likely Pathogenic	PM2, PVS1, PP4	Not checked	Positive	___	2022-04-13	No	___	___
														Missense	Novel	Chr8:145583958A>G	Potential Compound Heterozygote	NM_024531.5	c.806A>G	p.Tyr269Cys			VUS	BP4, PM3, PP4			___			___	___
Case6	10711	GNE myopathy	Solo	whole exome sequencing	No	Positive	Female	48 Y	Adulthood	Adulthood	Onset since 5-year ago with foot pain; Proximal muscle weakness, lower>upper limb; Lt. shin MRI: mild degree soft tissue swelling and edema; Elevated level of CPK; Low Ferritin; EMG-NCV: non-irritable myopathic process.	Myopathies	GAA	Missense	Novel	Chr17:78081636T>C	Compound Heterozygote	NM_000152.5	c.896T>C	p.Leu299Pro	Glycogen storage disease II; #MIM 232300, AR	Autosomal Recessive	Likely Pathogenic	PM2, PM1, PP3, PP5	Inherited	Positive	___	2022-03-01	No	___	___
														Splicing	Known	Chr17:78078341T>G	Compound Heterozygote	NM_000152.5	c.-32-13T>G	___	Glycogen storage disease II; #MIM 232300, AR	Autosomal Recessive	Pathogenic	PS3, PP5, PS1			PMID: 7881425, 24590251, 21439876, 22613277, 26231297, 24245577			___	___
Case7	12648	Myopathy	Solo	whole exome sequencing	Yes	Negative	Male	34 Y	Adulthood	Adulthood	Onset age: 29-year old; Neuropathy, distal lower limbs; Muscle weakness, distal & proximal (lower limbs); Difficulty climbing steps and rising from seated position; Foot dorsiflexor weakness; Axial weakness; Muscle cramps in distal limbs; Varicocele; Fat deposition in left arm, both thighs and legs MRI; EMG-NCV: chronic myopathic disorders and chronic neurogenic process suggestive of MND; Muscle …	Myopathies	MYPN	Frameshift	Novel	Chr10:69957214CC>C	Homozygote	NM_032578.4	c.3265delC	p.Leu1089Serfs*8	Nemaline myopathy 11, autosomal recessive [#MIM:617336] AR; Cardiomyopathy, dilated, 1KK [#MIM:615248] AD; Cardiomyopathy, familial restrictive, 4 [#MIM:615248] AD; Cardiomyopathy, hypertrophic, 22 [#MIM:615248] AD	Autosomal Recessive	Likely Pathogenic	PVS1-PM2	Not checked	VUS	___	2022-08-13	No	___	___
												Neuropathies	GBF1	Missense	Novel	Chr10:104120822G>A	Heterozygote	NM_001377137.1	c.1436G>A	p.Arg479Gln	Charcot-Marie-Tooth disease, axonal, type 2GG [#MIM:606483] AD	Autosoaml Dominant	VUS	PM2			___			___	___
Case8	14193	ALS	Solo	whole exome sequencing	No	Negative	Male	35 Y	Adulthood	Adulthood	Onset age 33-year old with dysarthria and feet weakness; No speech; Inability to walk; Spasticity of face muscle; Sialorrhea; Muscle spasticity, weakness & wasting; Muscle cramp; Difficulty tongue movement; Dysphagia; Motor sign, upper & lower; Chewing difficulty; Brain MRI: Enlarged cisterna magna; Rt. kidney hydronephrosis; EMG-NCV: suggestive of active motor neuron disease.	Overlapping	VPS13D	Splicing	Novel	Chr1:12414028T>A	Compound Heterozygote	NM_015378.4	c.9432-3T>A	___	Spinocerebellar ataxia, autosomal recessive 4 [MIM#607317]/AR	Autosomal Recessive	VUS	PM2	Not checked	VUS	___	2022-05-21	No	___	___
														Missense	Novel	Chr1:12405496C>T	Compound Heterozygote	NM_015378.4	c.8951C>T	p.Pro2984Leu			VUS	PM2,PP3			___			___	___
Case9	14842	Hereditary ataxia	Solo	whole exome sequencing	Yes	Positive	Female	26 Y	Adulthood	Childhood	Onset since 7 to 8-year old; Seizures since 11-year old; Fatigue & muscle weakness; Feet muscle atrophy since 19-year old; Lower limb spasticity; Hyperreflexia; Ataxia; Poor balance; Tremor; Spastic gait; Dysarthria; Poor fine motor coordination; Dysmetria; Impaired finger to nose test; Urinary incontinence & urgency, transient.	Overlapping	COQ4	Missense	Novel	Chr9:131095871C>T	Compound Heterozygote	NM_016035.5	c.745C>T	p.Arg249Trp	Coenzyme Q10 deficiency, primary, 7 [#MIM:616276]/AR	Autosomal Recessive	VUS	PM2,PP3	Not checked	VUS	___	2022-06-21	Whole exome sequencing was previously performed in e lab laboratuvar in Turkey for this individual and revealed the presence of an uncertain significance heterozygote variant in GARS1 gene defined as: c.1518G>C (p.Lys506Asn).	___	___
														Stop gain	Novel	Chr9:131095838G>T	Compound Heterozygote	NM_016035.5	c.712G>T	p.Glu238*			VUS	PVS1_Moderate,PM2_moderate			___			___	___
Case10	17164	CMS	Solo	whole exome sequencing	No	Negative	Female	47 Y	Adulthood	Not reported	Bilateral ptosis; Facial muscle weakness; Difficulty chewing; Bilateral cataract ; Generalized muscle weakness; Ventilation problem; Dysarthria; Nasal speech; Wheelchair bound from last week; Elevated level of LDH.	Neuromuscular junction disorders	DOK7	Frameshift	Known	Chr4:3494840_3494841insTGCC	Potential Compound Heterozygote	NM_173660.5	c.1124_1127dupTGCC	p.Ala378Serfs*30	Fetal akinesia deformation sequence 3; #MIM618389, AR Myasthenic syndrome, congenital, 10; #MIM254300, AR	Autosomal Recessive	Pathogenic	PVS1, PS3, PP5, PS1	Not checked	Positive	PMID: 16917026, 20458068, 20012313, 22661499, 17452375, 18626973, 23790237, 23219351PMID: 16917026, 2261499, 18165682, 18626973PMID: 25237101	2022-06-23	No	___	SCV001755389
														Inframe deletion	Known	Chr4:3465181_3465195delGGGGGGGGGCGCGGG	Potential Compound Heterozygote	NM_173660.5	c.54+25_55-38delGGGGGGGGGCGCGGG	___			Pathogenic	PS3, PP5, PS1			PMID: 18626973, 20458068, 20012313, 23219351PMID: 18626973			___	___
Case11	102483	LGMD	Solo	whole exome sequencing	No	Positive	Female	1 W	Childhood	Childhood	Polyhydramnios; Decreased fetal movement; Hypotonia; Diaphragmatic paralysis; Clubfeet; Arthrogryposis.	Myopathies	NEB	Missense	Novel	Chr2:152476266T>C	Potential Compound Heterozygote	NM_001271208.2	c.10571A>G	p.Lys3524Arg	Arthrogryposis multiplex congenita 6; #MIM619334/AR Nemaline myopathy 2, autosomal recessive; #MIM256030/AR	Autosomal Recessive	VUS	PM2, PP3	Not checked	VUS	___	2022-09-30	No	___	___
														Missense	Novel	Chr2:152460201G>A	Potential Compound Heterozygote	NM_001271208.2	c.13145C>T	p.Ala4382Val			VUS	PM2, PP3			___			___	___
Case12	104086	Myopathy	Solo	whole exome sequencing	Yes	Negative	Female	42 Y	Adulthood	Adulthood	Consanguineous parents, sporadic case, age of onset 43 years, proximal muscle weakness, climbing difficulty, positive Gower‘s sign, elevated CPK, myopathy reported in EMG, , muscle MRI showed fatty degeneration in both legs and early stage myopathy	Dystrophies	LIMS2	Missense	Novel	Chr2:128415003G>T	Potential Compound Heterozygote	NM_001161403.3	c.145C>A	p.Pro49Thr	?Muscular dystrophy, autosomal recessive, with cardiomyopathy and triangular tongue [#MIM:616827] AR	Autosomal Recessive	VUS	___	Not checked	VUS	___	2022-11-26	Multiplex Ligation Dependent Probe Amplification (MLPA) screening for deletions and duplications in Dystrophin gene was previously performed in this laboratory for this individual which revealed no Del/Dup in this patient.	___	___
														Inframe deletion	Novel	Chr2:128412006ATTC>A	Potential Compound Heterozygote	NM_001161403.3	c.348_350delGAA	p.Lys116del			VUS	___			___			___	___
Case13	104625	Myotonia	Solo	whole exome sequencing	No	Positive	Female	13 Y	Childhood	Childhood	Two affected siblings, age of onset 4-5 years, lid lag, proximal muscle weakness, sustained hand grip, positive Gower’s sign, facial weakness, myotonia reported in EMG, normal CPK, and normal echocardiography.	Myotonic syndrome	CLCN1	Synonymous	Known	Chr7:143020479G>A	Compound Heterozygote	NM_000083.3	c.774G>A	p.Glu258=	Myotonia congenita, dominant [#MIM:160800]/ AD; Myotonia congenita, recessive [#MIM:255700]/ AR; Myotonia levior, recessive	Autosomal Recessive	Likely Pathogenic	PM3_Strong, PM2, PP3	Inherited	Positive	PMID: 28427807	2022-12-14	No	___	SCV000927074
														Missense	Known	Chr7:143020402G>A	Compound Heterozygote	NM_000083.3	c.697G>A	p.Gly233Ser			Likely Pathogenic	PM2 PP3 PP5			PMID: 22790975; PMID: 29606556; PMID: 25438602,PMID: 22790975			___	___
Case14	105336	Hereditary Neuropathy	Solo	whole exome sequencing	No	Negative	Male	36 Y	Adulthood	Adulthood	Onset age: 18-year old; Easy fatigability; Difficulty walking; Pes cavus, bilateral; Atrophy of calf muscle, bilateral.	Neuropathies	SORD	Missense	Known	Chr15:45365702T>G	Potential Compound Heterozygote	NM_003104.6	c.1048T>G	p.Cys350Gly	Sorbitol dehydrogenase deficiency with peripheral neuropathy [#MIM:618912]/AR	Autosomal Recessive	VUS	PM2/PP3?	Not checked	Positive	PMID: 33397963	2023-01-15	No	___	___
														Missense	Novel	Chr15:45357501C>A	Potential Compound Heterozygote	NM_003104.6	c.458C>A	p.Ala153Asp			Likely Pathogenic	PP3/PM2/PS3/PP5/PM1?			___			___	___
Case15	105618	Hereditary Neuropathy	Solo	whole exome sequencing	No	Negative	Female	13 Y	Childhood	Childhood	Sporadic case, prematurity, frequent falling, ataxia, mild ID, EMG/NCV: chronic sensorimotor neuropathy.	Hereditary Ataxia	SAMD9L	Missense	Novel	Chr7:92762977T>G	Potential Compound Heterozygote	NM_152703.5	c.2308A>C	p.Lys770Gln	Spinocerebellar ataxia 49 [#MIM:619806], AD; Ataxia-pancytopenia syndrome [#MIM:159550], AD; Monosomy 7 myelodysplasia and leukemia syndrome 1 [#MIM:252270], AD	Autosoaml Dominant	VUS	PM2	De novo	VUS	___	2023-04-20	No	___	___
														Missense	Novel	Chr7:92761005T>C	Potential Compound Heterozygote	NM_152703.5	c.4280A>G	p.Tyr1427Cys			VUS	PM2			___			___	___
Case16	106684	Metabolic myopathy	Solo	whole exome sequencing	No	Positive	Male	38 Y	Adulthood	Childhood	Non -related parents, multiple affected individuals, myopathy, seizure, history of hypoglycemia, positive Gower’s sign, climbing and running difficulty, GSD reported in liver biopsy, normal echocardiography,elevated SGOT,SGPT,CPK and LDH, mixed neurogenic and myogenic reported in EMG/NCV	Myopathies	AGL	Frameshift	Novel	Chr1:100343359AC>A	Compound Heterozygote	NM_000642.3	c.1587del	p.Ser530Glnfs*6	Glycogen storage disease IIIa [#MIM:232400]/ AR; Glycogen storage disease IIIb [#MIM:232400]/ AR	Autosomal Recessive	Pathogenic	___	Inherited	Positive	___	2023-02-27	No	___	SCV001755664
														Stop gain	Novel	Chr1:100327235C>T	Compound Heterozygote	NM_000642.3	c.259C>T	p.Gln87*			Likely Pathogenic	PM1??			___			___	___
Case17	107477	CMS	Solo	whole exome sequencing	No	Negative	Female	5 Y	Childhood	Childhood	Bilateral ptosis at age 3 months, exacerbated by fatigue; Nystagmus; Esotropia; Positive anti acetylcholine receptor Ab; Negative Anti-MuSK.	Neuromuscular junction disorders	CHRNA1	Missense	Novel	Chr2:175622373G>C	Potential Compound Heterozygote	NM_000079.4	c.265C>G	p.Pro89Ala	Multiple pterygium syndrome, lethal type; #MIM253290/AR; Myasthenic syndrome, congenital, 1A, slow-channel; #MIM601462/AD; Myasthenic syndrome, congenital, 1B, fast-channel; #MIM608930/AD, AR	Autosomal Recessive	VUS	PM2, PP3	Not checked	VUS	___	2023-05-01	No	___	___
															Novel	Chr2:175612966C>A	Potential Compound Heterozygote	NM_000079.4	c.1260G>T	p.Lys420Asn			VUS	PM2, PP3			___			___	___
Case18	107690	Congenital myotonia	Solo	whole exome sequencing	No	Negative	Male	14 Y	Childhood	Childhood	Onset age: 10-year old with difficulty climbing steps & rising from seated position; Muscle spasm and stiffness; Bulbar dysfunction, mild; Fasciculation; EMG: myotonic process.	Overlapping	CLCN1	Splicing	Known	chr7:143036719G>A	Potential Compound Heterozygote	NM_000083.5	c.1582+5G>A	___	Myotonia congenita, dominant [#MIM:160800]/AD; Myotonia congenita, recessive [#MIM:255700]/AR; Myotonia levior [#MIM:160800]/AD	Autosomal Recessive	VUS	PM2/PP3/PM3-supp?	Not Checked	VUS	PMID: 33092578	2024-02-19	Genetic testing for diagnosis of myotonic dystrophy type 1 was previously performed in All Wales Molecular Genetics Laboratory and no evidence of a pathogenic triplet repeat expansion was detected in the DMPK gene.	___	___
														Missense	Known	chr7:143018525C>G	Potential Compound Heterozygote	NM_000083.3	c.501C>G	p.Phe167Leu			VUS	PM2-supp/PP2/PM3			PMID: 24349310, 24452722, 27199537			___	___
														Missense	Known	chr7:143017768C>T	Potential Compound Heterozygote	NM_000083.4	c.313C>T	p.Arg105Cys			VUS	PM2-supp/PP3/PP2/BS3-supp/PM3-supp?)>>AR inheritance			PMID: 23933576, 25065301, 21221019			___	___
Case19	108541	Myopathy	Solo	whole exome sequencing	Yes	Positive	Female	46 Y	Adulthood	Adulthood	Onset at the age of 31-year with difficulty climbing steps; Difficulty rising from seated position; Generalized hypotonia; Difficulty walking; Upper limb muscle weakness; Foot drop; Wheelchair-bound; MRI of Rt. Femur & Lt. leg: marked fatty degeneration in favor of advanced myopathy; Muscle biopsy: chronic myopathic disorder; EMG-NCV: suggestive of chronic severe non-irritable myopathy.	Overlapping	DYSF	Stop gain	Known	Chr2:71906303C>T	Compound Heterozygote	NM_003494.5	c.5884C>T	p.Gln1962*	Miyoshi muscular dystrophy 1 [#MIM254130]/AR; Muscular dystrophy, limb-girdle, autosomal recessive 2 [#MIM253601]/AR; Myopathy, distal, with anterior tibial onset [#MIM606768]/AR	Autosomal Recessive	Pathogenic	PVS1(Very Strong),PP5,PM2	Inherited	Positive	PMID: 27647186‚ 20544924	2023-04-16	No	___	___
														Splicing	Known	Chr2:71753481G>C	Compound Heterozygote	NM_003494.4	c.1180+5G>C	___			Likely Pathogenic	PP3,PP5,PM2			PMID: 29797799			___	___
Case20	108664	CMT	Solo	whole exome sequencing	No	Positive	Male	31 Y	Adulthood	Childhood	Onset since 4-year old; Difficulty running & walking; Muscle cramps; Hoarse voice; Diaphragmatic paralysis, unilateral; Progressive muscle weakness, distal>proximal, lower>upper; Fingers joint contracture; Hand & foot muscle atrophy; Pes cavus; Hammertoes; Sexual dysfunction; Wheelchair bound since 17-18 year old; EMG-NCV: severe chronic axonal type sensorimotor polyneuropathy.	Neuropathies	MFN2	Missense	Known	Chr1:12061480G>A	Compound Heterozygote	NM_014874.4	c.839G>A	p.Arg280His	Charcot-Marie-Tooth disease, axonal, type 2A2A [#MIM::609260]/AD; Charcot-Marie-Tooth disease, axonal, type 2A2B [#MIM:617087]/AR; Hereditary motor and sensory neuropathy VIA [#MIM:601152]/AD	Autosomal Recessive	Likely Pathogenic	PM2-PM5-PP3-PP5-PP2	Inherited	Positive	PMID: 15064763	2023-04-19	No	___	SCV001167080.1
														Missense	Known	Chr1:12059084C>T	Compound Heterozygote	NM_014874.4	c.748C>T	p.Arg250Trp			Likely Pathogenic	PM2-PM5-PP3-PP5-PP2			PMID: 16714318			___	___
Case21	110835	Myopathy	Solo	whole exome sequencing	Yes	Positive	Male	31 Y	Adulthood	Adulthood	Consanguineous parents, normal muscle force, exercise intolerance, mild myopathic atrophy ,rare necrosis and myophagocytosis reported in muscle biopsy, mild myopathic process in EMG/NCV, elevated CPK and normal echocardiography.	Dystrophies	DYSF	Missense	Known	Chr2:71896842T>C	Potential Compound Heterozygote	NM_003494.4	c.5633T>C	p.Leu1878Pro	Muscular dystrophy, limb-girdle, autosomal recessive 2 [#MIM253601] AR; Miyoshi muscular dystrophy 1 [#MIM254130] AR; Myopathy, distal, with anterior tibial onset.[#MIM 606768] AR	Autosomal Recessive	VUS	PM2,PP3(Moderate)	Not checked	VUS	PMID: 31693312, 31937337	2023-02-12	Multiplex Ligation Dependent Probe Amplification (MLPA) screening for deletions and duplications in Dystrophin gene was previously performed in this laboratory for this individual which revealed no Del/Dup in this patient.	___	___
														Splicing	Known	Chr2:71825881T>A	Potential Compound Heterozygote	NM_003494.4	c.3702+6T>A	___			VUS	PM2,PP3(Moderate)			PMID: 35273475			___	___
Case22	111068	SMA	Solo	whole exome sequencing	No	Positive	Female	32 Y	Adulthood	Childhood	Age of onset 15 years, multiple affected individuals ,non-consanguineous parents , lower muscle weakness and cramps, decreased DTR, lower and bulbar muscle involvement , dysarthria , unbalanced gait,chronic motor neurogenic process reported in EMG/NCV,negative for SMN deletion screening , focal periventricular high density reported in brain MRI.	Hereditary Paraplegia	SPG11	Frameshift	Known	Chr15:44949427CAT>C	Potential Compound Heterozygote	NM_025137.4	c.733_734del	p.Met245Valfs*2	Amyotrophic lateral sclerosis 5, juvenile [#MIM:602099]/ AR; Charcot-Marie-Tooth disease, axonal, type 2X [#MIM:616668]/ AR; Spastic paraplegia 11, autosomal recessive [#MIM:604360]/ AR	Autosomal Recessive	Pathogenic	PM2, PVS1, PP5	Not checked	Positive	PMID: 17322883, 17717710, 18067136, 18079167, 18332254, 18835492, 19105190, 19438933, 20110243, 22175763, 22237444, 22696581, 24833714, 27071356	2023-05-23	No	___	___
														Frameshift	Known	Chr15:44905697C>CT	Potential Compound Heterozygote	NM_025137.4	c.3075dup	p.Glu1026Argfs*4			Pathogenic	PM2, PVS1, PP5			PMID: 18067136, 19105190, 19194956, 20110243, 27071356, 27084228, 28991695			___	SCV001755384
Case23	112829	LGMD	Solo	whole exome sequencing	No	Negative	Female	34 Y	Adulthood	Childhood	Sporadic case, age of onset13 years, proximal lower and upper muscle weakness, running difficulty, unsteady gait, elevated CPK,non irritable myopathy reported in EMG, myopathic dystrophy reported in muscle MRI.	Dystrophies	SGCA	Missense	Known	Chr17:48247606C>T	Potential Compound Heterozygote	NM_000023.4	c.850C>T	p.Arg284Cys	Muscular dystrophy, limb-girdle, autosomal recessive 3 [#MIM:608099]	Autosomal Recessive	Pathogenic	PM2, PM5?, PP3, PP2, PP5-Strong, PM3, PS3_supporting	Not checked	Positive	PMID: 9032047, 9192266, 25135358, 26404900, 26453141, 32528171, 31268554, 31066050, 30919934	2023-02-08	No	___	SCV001755380
														Missense	Known	Chr17:48246593T>C	Potential Compound Heterozygote	NM_000023.4	c.725T>C	p.Val242Ala			Likely Pathogenic	PM2, PM3, PM5, PP3, PP2			PMID: 7663524; 15032976; 19770540			___	___
Case24	201307	LGMD	Solo	whole exome sequencing	No	Negative	Female	39 Y	Adulthood	Adulthood	Sporadic case .proximal lower muscle weakness started 6 years earlier, walking, climbing difficulty, lordosis, myopathic changes in EMG, elevated CPK, muscular dystrophy reported in muscle biopsy and normal report of IHC.	Dystrophies	CAPN3	Frameshift	Known	Chr15:42703129GCAGA>G	Potential Compound Heterozygote	NM_000070.3	c.2314_2317del	p.Asp772Asnfs*3	Muscular dystrophy ,limb-girdle, autosomal dominant 4 [#MIM: 618129],AD; Muscular dystrophy, limb-girdle, autosomal recessive 1 [#MIM:253600],AR	Autosomal Recessive	Pathogenic	PVS1_strong, PP5_moderate,PM2	Not checked	Positive	PMID: 7720071, 25135358	2023-06-09	No	___	___
														Missense	Known	Chr15:42691746C>T	Potential Compound Heterozygote	NM_000070.3	c.1250C>T	p.Thr417Met			Pathogenic	PP5_strong,PP3_strong,PM2,PP2_supporting?			PMID: 16650086, 20517216, 25079074, 25135358, 15689361, 18258189, 27447704, and 34440373,19226146			___	SCV001755319
Case25	202080	SMA	Solo	whole exome sequencing	No	Negative	Male	6 M	Childhood	Childhood	Sporadic case, age 6 months, hypotonia, floppy baby, elevated CPK, myopathic process in EMG, Hx of pneumonia (aspiration pneumonia).	Dystrophies	LAMA2	Splicing	Known	Chr6:129837334G>A	Potential Compound Heterozygote	NM_000426.4	c.9212-1G>A	___	Muscular dystrophy, congenital, merosin deficient or partially deficient [MIM# 607855], ARMuscular dystrophy, limb-girdle, autosomal recessive 23 [MIM# 618138],AR	Autosomal Recessive	Pathogenic	PVS1_Strong/PM2_Moderate	Not checked	Positive	PMID: 30055037, 37318662, 37182895, 26046366,30827497	2023-11-27		___	___
														Stop gain	Novel	Chr6:129663524C>T	Potential Compound Heterozygote	NM_000426.4	c.4348C>T	p.Arg1450*			Pathogenic	PM3_Strong/PVS1_Very strong/PM2_Moderate			___		Multiplex Ligation Dependent Probe Amplification (MLPA) screening for deletions of SMN1 gene was previously performed in this laboratory for this individual which revealed no deletion in this patient.	___	___
Case26	203621	LGMD	Solo	whole exome sequencing	Yes	Negative	Female	13 Y	Childhood	Childhood	Consanguineous parents, sporadic case, age of onset 9 years, proximal lower muscle weakness, waddling gait, positive Gower`s sign, calf pseudohypertrophy, foot deformity, elevated CPK, myopathy reported in EMG and normal echocardiography	Dystrophies	CAPN3	Missense	Known	Chr15:42691814C>T	Potential Compound Heterozygote	NM_000070.3	c.1318C>T	p.Arg440Trp	Muscular dystrophy, limb-girdle, autosomal dominant 4, [#MIM: 618129]/AD Muscular dystrophy, limb-girdle, autosomal recessive 1, [#MIM:253600]/AR	Autosomal Recessive	Pathogenic	PP5_Strong/PP3_Strong/PM1_Moderate/PM5_Moderate/PM2_Supporting	Not checked	Positive	PMID: 26060040, 25326637, 22926650, 18055493,21984748, 20694146, 19048948, 15221789, 11525884, 9150160	2023-06-12	No	___	SCV001755540
														Splicing	Novel	Chr15:42684835A>G	Potential Compound Heterozygote	NM_000070.3	c.946-2A>G	___			Pathogenic	PP5_Strong/PVS1_Strong/PM2_Moderate			___			___	SCV001755207
Case27	203735	Congenital myopathy	Solo	whole exome sequencing	No	Positive	Male	13 Y	Childhood	Childhood	Two affected patients, proximal lower muscle weakness, gait disturbance, myogenic pattern in EMG, flat feet, negative IHC for all examined antibodies and focal fiber type grouping reported in muscle biopsy.	Myopathies	RYR3	Missense	Novel	Chr15:34130587C>G	Compound Heterozygote	NM_001036.6	c.12406C>G	p.Leu4136Val	Congenital myopathy 20 [#MIM 620310]/AR	Autosomal Recessive	VUS	PM2,BP1	Inherited	VUS	___	2023-11-25	No	___	___
														Missense	Novel	Chr15:34117877C>T	Compound Heterozygote	NM_001036.6	c.11146C>T	p.Leu3716Phe			VUS	PM2_moderate,PP3_moderate,BP1			___			___	___
Case28	203866	GNE myopathy	Solo	whole exome sequencing	Yes	Negative	Female	38 Y	Adulthood	Adulthood	Sporadic case, started 17 years earlier with proximal muscle and axial weakness, lordosis, prominent winging, elevated CPK, normal brain CT scan, sarcolemmal labelling in all examined antibodies reported in IHC, rimmed vacuole myopathy with fibrosis and multiple negative COX fibers reported in muscle biopsy, myopathy process in EMG.	Hereditary Ataxia	SYNE1	Stop gain	Known	Chr6:152751745G>A	Potential Compound Heterozygote	NM_033071.5	c.4582C>T	p.Arg1528*	Arthrogryposis multiplex congenita 3, myogenic type [#MIM618484] AR, Emery-Dreifuss muscular dystrophy 4, autosomal dominant [#MIM612998] AD, Spinocerebellar ataxia, autosomal recessive 8 [#MIM610743] AR	Autosomal Recessive	Pathogenic	?	Not checked	Positive	PMID: 29482223, 34234304	2023-06-12	No	___	___
														Missense	Novel	Chr6:152712551G>A	Potential Compound Heterozygote	NM_033071.5	c.7886C>T	p.Ala2629Val			VUS	PM2,BP1			___			___	___
Case29	204502	Congenital myotonia	Solo	whole exome sequencing	No	Negative	Female	10 Y	Childhood	Childhood	Sporadic case, age 11 years, muscle myotonia, gait difficulty, mild facial weakness, myopathic process with myotonic discharge reported in EMG and normal echocardiography	Myotonic syndrome	CLCN1	Stop gain	Novel	Chr7:143039032GC>G	Compound Heterozygote	NM_000083.3	c.1594delC	p.Leu532*	Myotonia congenita, dominant (#MIM:160800) \ AD; Myotonia congenita, recessive (#MIM:255700) \ AR; Myotonia levior (#MIM:160800) \ AD	Autosomal Recessive	Likely Pathogenic	PVS1, PM2	Inherited	Positive	___	2023-12-18	No	___	___
														Splicing	Novel	Chr7:143036719G>A	Compound Heterozygote	NM_000083.3	c.1582+5G>A	___			VUS	PM2, PP3, PP1			___			___	___
Case30	205285	Myopathy	Solo	whole exome sequencing	No	Negative	Female	70 Y	Adulthood	Adulthood	Sporadic case, proximal lower muscle weakness, non irritable myopathy reported EMG, positive Gower’s sign, elevated CPK.	Dystrophies	PLEC	Inframe deletion	Novel	chr8:145002081CCTT>C	Potential Compound Heterozygote	NM_000445.5	c.3418_3420del	p.Lys1140del	Muscular dystrophy, limb-girdle, autosomal recessive 17 [#MIM613723] AR, Epidermolysis bullosa simplex 5C, with pyloric atresia [#MIM612138] AR, Epidermolysis bullosa simplex 5B, with muscular dystrophy [#MIM226670] AR, Epidermolysis bullosa simplex 5A, Ogna type [#MIM131950] AD, ?Epidermolysis bullosa simplex 5D, generalized intermediate, autosomal recessive [#MIM616487] AR	Autosomal Recessive	VUS	PM2,PM4	Not checked	VUS	___	2023-12-20	No	___	___
														Missense	Novel	chr8:144995875G>A	Potential Compound Heterozygote	NM_000445.5	c.8195C>T	p.Ala2732Val			VUS	PM2,BP1			___			___	___
Case31	205770	Congenital myopathy	Solo	whole exome sequencing	No	Negative	Female	4 Y	Childhood	Childhood	Onset age: 3-year old with difficulty rising from seated position & climbing steps; Upper & lower limbs weakness; Hyperlaxity, hands, fingers, toes; Gowers sign; Elevated CPK level; EMG-NCV: non dystrophic myopathic process	Dystrophies	COL6A2	Missense	Known	chr21:47551895G>A	Compound Heterozygote	NM_001849.4	c.2489G>A	(p.Arg830Gln)	?Myosclerosis, congenital [#MIM:255600]/AR; Bethlem myopathy 1 [#MIM:158810]/AD, AR; Ullrich congenital muscular dystrophy 1 [#MIM:254090]/AD, AR	Autosomal Recessive	Likely Pathogenic		Not checked	Positive	PMID: 29419890	2024-01-20	___	___	___
														Stop gain	Novel	chr21:47532372C>T	Compound Heterozygote	NM_001849.4	c.595C>T	(p.Gln199*)			Likely Pathogenic				___			___	___
Case32	206036	LGMD	Solo	whole exome sequencing	Yes	Negative	Male	12 Y	Childhood	Childhood	Consanguineous parents, sporadic case, frequent falling since child hood, mild waddling gait, lower muscle weakness, positive Gower s sign, calf pseudohypertrophy, elevated CPK, early stage of muscular dystrophy reported in muscle biopsy and irritable myopathy reported in EMG.	Dystrophies	CAPN3	Missense	Known	chr15:42703124G>A	Compound Heterozygote	NM_000070.3	c.2306G>A	(p.Arg769Gln)	Muscular dystrophy, limb-girdle, autosomal dominant 4 [#MIM618129] AD; Muscular dystrophy, limb-girdle, autosomal recessive 1 [#MIM253600] AR	Autosomal Recessive	Pathogenic	PM5,PP5(Moderate),PM2,PP3(Moderate),PP2,PM1,PS3(Supporting)	Not checked	Positive	PMID: 7720071, 7762565, 7795603, 9246005, 12461690, 14645990	2024-06-08	Multiplex Ligation Dependent Probe Amplification (MLPA) screening for deletions and duplications in Dystrophin gene was previously performed in this laboratory for this individual which revealed no Del/Dup in this patient.	___	___
														Missense	Novel	chr15:42702183C>T	Compound Heterozygote	NM_000070.3	c.2105C>T	(p.Ala702Val)			Likely Pathogenic	PM5,PP5,PM2,PP3,PP2,PM1?			___			___	___
Case33	206982	Congenital myotonia	Solo	whole exome sequencing	No	Negative	Male	39 Y	Adulthood	Childhood	Sporadic case, started at age 7 years with progressive muscle weakness and speech problem, hand myotonia, calf hypertrophy, eye muscle myotonia and myotonia congenita reported in EMG	Myotonic syndrome	CLCN1	Splicing	Known	chr7:143047570G>A	Compound Heterozygote	NM_000083.3	c.2508+1G>A	___	Myotonia congenita, dominant [#MIM: 160800], AD; Myotonia congenita, recessive [#MIM: 255700], AR; myotonia levior [#MIM: 160800],AD.	Autosomal Recessive	Likely Pathogenic	PVS1_ST,PM2_M,PP5_SP	Not checked	Positive	PMID: 17932099, 22094069, and 23739125	2024-02-11	___	___	___
														Stop gain	Novel	chr7:143013432C>T	Compound Heterozygote	NM_000083.3	c.127C>T	p.Gln43*			Likely Pathogenic	PVS1_ST,PM2_M			___			___	___
Case34	208759	Metabolic myopathy	Solo	whole exome sequencing	No	Negative	Female	39 Y	Adulthood	Adulthood	Sporadic case, age 40 years, age of onset 7 years ago, generalized muscle weakness (proximal more than distal), exercise intolerance, muscle cramps, positive Gower s sign, normal EMG, atrophy type 2 fibers with some moth-eathen fibers reported in muscle biopsy, elevated LFT, LDH and CPK.	Myopathies	GAA	Inframe deletion	Novel	chr17:78086747CAGA>C	Potential Compound Heterozygote	NM_000152.5	c.1962_1964del	p.Glu656del	Glycogen storage disease II [#MIM232300] AR	Autosomal Recessive	Pathogenic	PM1,PM4,PM2,PS3(Supporting),PM3,PP5	Not checked	Positive	___	2024-03-25	No	___	___
														Missense	Known	chr17:78086478G>A	Potential Compound Heterozygote	NM_000152.5	c.1856G>A	p.Ser619Asn			Pathogenic	PM1,PP2,PM2,PP3(Moderate),PM5,PS3(Supporting),PM3,PP5			PMID: 16838077, 22990675, 24158270, 25998610, 26946079			___	___
Case35	211105	Hereditary ataxia	Solo	whole exome sequencing	Yes	Negative	Female	17 Y	Childhood	Childhood	Childhood onset; Nystagmus; Delayed motor milestone; Imbalance; Ataxic gait; Abnormal ABR study; Normal EEG; Brain MRI: few non-specific high signal foci in subcortical in both cerebral hemispheres.	Hereditary Ataxia	GRM1	Splicing	Novel	chr6:146625741T>A	Homozygote	NM_001278064.2	c.951-6T>A	___	Spinocerebellar ataxia 44 [#MIM:617691]/AD; Spinocerebellar ataxia, autosomal recessive 13 [#MIM:614831]/AR	Autosomal Recessive	VUS	PM2-PP3	Not checked	VUS	___	2024-05-20	No	___	___
												Hereditary Paraplegia	MAG	Missense	Novel	chr19:35800840G>A	Homozygote	NM_002361.4	c.1295G>A	p.Cys432Tyr	Spastic paraplegia 75, autosomal recessive [#MIM:616680]/AR		VUS	PM2-PP3			___			___	___
Case36	211606	Congenital myopathy	Solo	whole exome sequencing	No	Negative	Male	26 Y	Adulthood	Childhood	Sporadic case, started childhood with proximal and distal upper and lower muscle weakness, facial muscle weakness, myopia, foot drop, gait abnormality, bulbar dysfunction and chronic non irritable myopathy reported in EDX	Myopathies	LMOD3	Frameshift	Novel	chr3:69168903GTC>G	Compound Heterozygote	NM_198271.5	c.601_602del	p.Asp201GlnfsTer9	Nemaline myopathy 10 [#MIM:616165]/AR	Autosomal Recessive	Likely Pathogenic	PVS1_Strong/PM2_Moderate	Inherited	Positive	___	2024-05-15	No	___	___
														Missense	Novel	chr3:69168586C>T	Compound Heterozygote	NM_198271.5	c.920G>A	p.Arg307His			VUS	PM2_Moderate/PP3_Moderate			___			___	___
Case37	300977	LGMD	Solo	whole exome sequencing	No	Negative	Female	23 Y	Adulthood	Childhood	Sporadic case, age 23 years old, hypotonia, walking delay ( 4 years), proximal lower and upper muscle weakness, positive Gowers sign, waddling gait , lordosis, scoliosis, flat foot, elbow and aschills stifness, normal echocardiography except of mild MR,TR and PI ,centronuclear or muscular dystrophy suggestive in muscle biopsy report ,myogenic pattern and the LGMD impression reported in EDX	Dystrophies	TTN	Stop gain	Novel	chr2:179600451C>A	Compound Heterozygote	NM_001267550.2	c.14722G>T	p.Glu4908*	Cardiomyopathy, dilated, 1G [#MIM:604145]/AD; Cardiomyopathy, familial hypertrophic, 9 [#MIM:613765]/AD; Congenital myopathy 5 with cardiomyopathy [#MIM:611705]/AR; Muscular dystrophy, limb-girdle, autosomal recessive 10 [#MIM:608807]/AR; Myopathy, myofibrillar, 9, with early respiratory failure [#MIM:603689]/AD; Tibial muscular dystrophy, tardive [#MIM:600334]/AD	Autosomal Recessive	Likely Pathogenic	Not Provided	Inherited	Positive	___	2024-07-18	No	___	___
														Stop gain	Known	chr2:179393524G>A	Compound Heterozygote	NM_001267550.2	c.106954C>T	p.Arg35652*			Pathogenic	PVS1, PM2, PP5			PMID: 25326637, 27625338			___	___
Case38	301078	Hereditary ataxia	Solo	whole exome sequencing	No	Negative	Female	35 Y	Adulthood	Not reported	Age 35 years, ataxia started 4 years ago , cerebellar signs, dysarthria, normal brain MRI and normal EDX report.	Hereditary Ataxia	STUB1	Splicing	Novel	chr16:731608G>C	Potential Compound Heterozygote	NM_005861.4	c.524+5G>C	___	Spinocerebellar ataxia 48 [#MIM:618093],AD; Spinocerebellar ataxia, autosomal recessive 16 [#MIM:615768],AR	Autosomal Recessive	VUS	PM2_M,PP3_SP	Not checked	VUS	___	2024-07-17	No	___	___
														Missense	Known	chr16:731512A>C	Potential Compound Heterozygote	NM_005861.4	c.433A>C	p.Lys145Gln			VUS	PM2_SP,PP5_M,PM1???			PMID: 24719489, 28193272, 28193273, 28444220, 29915382, 32367277, 33417001, 34663476			___	___
Case39	301298	ALS	Solo	whole exome sequencing	Yes	Negative	Male	37 Y	Adulthood	Adulthood	Sporadic case, consanguineous parents, elevated CPK, facial weakness, gait abnormality, asymmetric proximal upper and lower muscle weakness, active motor neuron disease reported in EDX.	Motor Neuron Disease	TUBA4A	Missense	Novel	chr2:220115867T>C	Heterozygote	NM_006000.3	c.554A>G	p.Tyr185Cys	Amyotrophic lateral sclerosis 22 with or without frontotemporal dementia [#MIM616208] AD	Autosoaml Dominant	VUS	PM2,PP3(Moderate)	Not checked	Unclear	___	2024-07-20	No	___	___
												Motor Neuron Disease	TARDBP	Missense	Known	chr1:11082347G>T	Homozygote	NM_007375.4	c.881G>T	p.Gly294Val	Amyotrophic lateral sclerosis 10, with or without FTD [#MIM612069] AD, Frontotemporal lobar degeneration, TARDBP-related [#MIM612069] AD	Autosoaml Dominant	Likely Pathogenic	PM1(Supporting),PM2,PS3(Supporting),PM5,PP5(Moderate),PP2			PMID: 19864664, 21651514, 29630989			___	___
Case40	301880	Congenital myopathy	Solo	whole exome sequencing	No	Negative	Female	2 Y	Childhood	Childhood	Sporadic case, age two years old, hypotonia, generalized muscle weakness, feeding difficulty, dysphagia, facial weakness, delayed walking, aspiration pneumonia ,small AS ,mild TR and PR reported in echocardiography and non irritable myopathy process reported in EDX.	Myopathies	NEB	Splicing	Novel	chr2:152544139C>T	Potential Compound Heterozygote	NM_001271208.2	c.2523+1G>A	___	Nemaline myopathy 2, autosomal recessive [#MIM256030] AR; Arthrogryposis multiplex congenita 6 [#MIM619334] AR	Autosomal Recessive	Likely Pathogenic	PVS1(Very Strong),PM2	Not checked	Positive	___	2024-07-20	No	___	___
														Stop gain	Novel	chr2:152520274T>A	Potential Compound Heterozygote	NM_001271208.2	c.5551A>T	p.Lys1851*			Likely Pathogenic	PVS1(Very Strong),PM2			___			___	___
Case41	302075	Metabolic myopathy	Solo	whole exome sequencing	No	Negative	Male	42 Y	Adulthood	Adulthood	Sporadic case age of onset 20 yearsold with lower and upper muscle weakness, facial and bulbar muscle weakness, normal CPK, irritable myopathy reported in EDX, lipid storage myopathy reported in muscle biopsy.	Myopathies	ETFDH	Missense	Known	chr4:159616778G>A	Potential Compound Heterozygote	NM_004453.4	c.814G>A	p.Gly272Arg	Glutaric acidemia IIC [#MIM231680] AR	Autosomal Recessive	Likely Pathogenic	PM1,PP2,PP3(Moderate),PM3,PM2	Not checked	Positive	PMID: 17977044, 28914566, 32007756, 30948559, 26990548	2024-08-03	No	___	___
														Missense	Known	chr4:159603560A>T	Potential Compound Heterozygote	NM_004453.4	c.389A>T	p.Asp130Val			Pathogenic	PM1,PP2,PP3(Moderate),PM3(Strong),PM2			PMID: 19758981, 23628458, 24357026, 24522293, 25913573, 29336361			___	___
Case42	8202544	CMT	Solo	whole exome sequencing	No	Negative	Male	14 Y	Childhood	Childhood	Decreased DTR (~0); Wasting of lower limbs; Claw toes, mild; Age of onset: 2-year ago with bilateral foot drop; Abnormal gait; PMP22 MLPA:no del/dup; CPK:732; High urine random protein; High level of gamma serum protein EP; Serum kappa light chain (↑), Serum lambda light chain total (↑); EMG-NCV:motor sensory neuropathy, chronic demyelinising, CMT should be noted	Neuropathies	NEFL	Missense	Known	Chr8:24813227A>G	Potential Compound Heterozygote	NM_006158.5	c.803T>C	p.Leu268Pro	Charcot-Marie-Tooth disease, dominant intermediate G 617882 AD 3Charcot-Marie-Tooth disease, type 1F 607734 AD, AR 3Charcot-Marie-Tooth disease, type 2E 607684 AD 3	Autosomal Recessive	Pathogenic	PS2, PS4_Moderate, PM2, PM5, PP3	De novo	Positive	PMID: 38374194	2019-02-02	Multiplex Ligation Dependent Probe Amplification (MLPA) screening for deletions and duplications in CMT/HNPP region was previously performed in this laboratory for this individual and revealed no Del/Dup in PMP22 gene.	___	SCV001167079.1
														Missense	Known	Chr8:24810360C>T	Potential Compound Heterozygote	NM_006158.5	c.1595G>A	p.Gly532Asp			VUS	PM2,PP3	Inherited		PMID: 38374194			___	___
Case43	8202919	Myopathy	Solo	whole exome sequencing	No	Positive	Female	9 Y	Childhood	Childhood	Respiratory difficulty; Weak crying; Generalized muscle weakness and wasting; Swallowing difficulty; Recurrent pulmonary infections; Short stature; Long face; Blue sclera; Chest deformity; Laxity of joints; Flexion deformity of knee; Lordosis & Kyphoscoliosis; Prominent heel and flat feet	Overlapping	RYR1	Inframe deletion	Known	Chr19:39070672CAAC>C	Compound Heterozygote	NM_000540.3	c.14419_14421del	p.Asn4807del	Congenital myopathy 1B, autosomal recessive 255320 AR	Autosomal Recessive	VUS	PM2,PM4,PM3_Supporting	Inherited	VUS	PMID: 38374194	2017-11-15	Multiplex Ligation Dependent Probe Amplification (MLPA) screening for deletions of SMN1 gene was previously performed in this laboratory for this individual which revealed no deletion in this patient.	___	___
														Inframe duplication	Known	Chr19:38924492A>ACGA	Compound Heterozygote	NM_000540.3	c.24_26dup	p.Asp8dup			VUS	PM2,PM4, PM3_Supporting			PMID: 38374194			___	___
Case44	9106285	Muscular dystrophy	Solo	whole exome sequencing	No	Positive	Female	34 Y	Adulthood	Childhood	NA	Overlapping	PLEC	Stop gain	Known	Chr8:145003680G>A	Compound Heterozygote	NM_201384.3	c.2983C>T	p.Gln995*	?Epidermolysis bullosa simplex with nail dystrophy 616487 AREpidermolysis bullosa simplex with muscular dystrophy 226670 AREpidermolysis bullosa simplex with pyloric atresia 612138 ARMuscular dystrophy, limb-girdle, autosomal recessive 17 613723 AR	Autosomal Recessive	Likely Pathogenic	PVS1, PM2	Inherited	Positive	PMID: 25556389	2013-05-02	No	___	SCV001755549
														Missense	Known	Chr8:144992567C>T	Compound Heterozygote	NM_201384.3	c.11422G>A	p.Gly3808Ser			VUS	PM2, PP3, BP1			PMID: 38374194			___	___
Case45	9107252	Motor neuron disease	Solo	whole exome sequencing	No	Negative	Female	49 Y	Adulthood	Adulthood	Onset of weakness since 6-month ago; Upper & lower limbs weakness & atrophy; Dysarthria; Fasciculations; Tongue fibrillation; Difficulty swallowing; Increased DTR; EMG-NCV: active motor neuron disease such as ALS.	Overlapping	PLEKHG5	Splicing	Novel	Chr1:6534226T>C	Potential Compound Heterozygote	NM_020631.6	c.440-2A>G	___	Charcot-Marie-Tooth disease, recessive intermediate C; #MIM615376, AR Spinal muscular atrophy, distal, autosomal recessive, 4; #MIM611067, AR	Autosomal Recessive	Likely Pathogenic	PM2, PVS1	Not checked	Positive	___	2022-08-05	No	___	___
														Missense	Novel	Chr1:6534093G>A	Potential Compound Heterozygote	NM_020631.6	c.571C>T	p.Arg191Trp			VUS	PM2			___			___	___
Case46	9202215	Muscular dystrophy	Solo	whole exome sequencing	Yes	Negative	Male	36 Y	Adulthood	Not reported	NA	Overlapping	TTN	Stop gain	Known	Chr2:179659860C>T	Compound Heterozygote	NM_001267550.2	c.1034G>A	p.Trp345*	Cardiomyopathy, dilated, 1G 604145 3Cardiomyopathy, familial hypertrophic, 9 613765 AD 3Muscular dystrophy, limb-girdle, autosomal recessive 10 608807 AR 3Myopathy, myofibrillar, 9, with early respiratory failure 603689 AD 3Salih myopathy 611705 AR 3Tibial muscular dystrophy, tardive 600334 AD 3	Autosomal Recessive	VUS	PVS1_Moderate, PM2, PP3	Inherited	VUS	PMID: 38374194	2014-07-12	MLPA-No del/Dup	___	___
														Missense	Known	Chr2:179393553C>T	Compound Heterozygote	NM_001267550.2	c.106925G>A	p.Gly35642Asp			VUS	PM2, BP1			PMID: 38374194			___	___
Case47	9205472	Muscular dystrophy	Solo	whole exome sequencing	Yes	Positive	Male	31 Y	Adulthood	Childhood	centronuclear myopathy	Myopathies	RYR1	Missense	Known	Chr19:39070673A>G	Compound Heterozygote	NM_000540.3	c.14416A>G	p.Asn4806Asp	Congenital myopathy 1B, autosomal recessive 255320 AR	Autosomal Recessive	Pathogenic	PM2, PM3_VeryStrong, PP2, PP3, PP4	Inherited	Positive	PMID: 38374194	2014-09-25	No	___	SCV001755574
														Missense	Known	Chr19:38998423T>C	Compound Heterozygote	NM_000540.3	c.8888T>C	p.Leu2963Pro			Pathogenic	PS3_Supporting, PM2, PM3_VeryStrong, PP2,PP3			PMID: 27234031			___	SCV001755390
Case48	9302038	CMT	Solo	whole exome sequencing	No	Negative	Male	12 Y	Childhood	Childhood	Abnormal gait; Inability to walk independently; Weakness of facial musculature; Muscle wasting, hands & feet; Abnormal posture, hands & feet; Claw toe deformity; Foot dorsiflexor weakness; EMG-NCV: peripheral sensorimotor neuropathic process, axonal or mixed type; Sensorimotor neuropathy.	Neuropathies	GDAP1	Missense	Known	Chr8:75272408T>C	Compound Heterozygote	NM_018972.4	c.347T>C	p.Met116Thr	Charcot-Marie-Tooth disease, axonal, type 2K [#MIM:607831]/AD,AR; Charcot-Marie-Tooth disease, axonal, with vocal cord paresis [#MIM:607706]/AR; Charcot-Marie-Tooth disease, recessive intermediate, A [#MIM:608340]/AR; Charcot-Marie-Tooth disease, type 4A [#MIM:214400]/AR	Autosomal Recessive	VUS	PM1,PM2,PM5,PM3?	Inherited	Positive	PMID:16343542, 21212451, 20232219, 32183277	2023-12-06	No	___	___
														Stop gain	Known	Chr8:75262808C>T	Compound Heterozygote	NM_018972.4	c.112C>T	p.Gln38*			Pathogenic	PVS1_very strong,PM2,PP5			PMID: 31673878			___	___
Case49	9305892	Myopathy	Solo	whole exome sequencing	No	Negative	Male	12 Y	Childhood	Childhood		Myopathies	NEB	Frameshift	Novel	Chr2:152548677GA>G	Potential Compound Heterozygote	NM_001271208.2	c.2001delT	p.Arg668Aspfs*7	Arthrogryposis multiplex congenita 6 [#MIM:619334]/AR; Nemaline myopathy 2, autosomal recessive [#MIM:256030]/AR	Autosomal Recessive	Likely Pathogenic	PVS1- PM2	Not checked	Positive	___	2023-05-21	No	___	___
											Onset age: 7-year; Delayed ability to walk; Neck flexor weakness; Lower limb muscle weakness, proximal, mild; EMG-NCV: myopathic process; Muscle biopsy: suggestive of nemaline myopathy.			Missense	Novel	Chr2:152447885C>T	Potential Compound Heterozygote	NM_001271208.2	c.14911G>A	p.Ala4971Thr			VUS	PM2	Not checked		___			___	___
Case50	9319612	Congenital myotonia	Solo	Gene panel sequencing	Yes	Positive	Male	32 Y	Adulthood	Childhood	Onset in adolescent age, Muscle stiffness, Warm-up phenomenon, Delayed relaxation of muscle after contraction, Muscle hypertrophy of the upper and lower extremities	Myotonic syndrome	CLCN1	Frameshift	Known	Chr7:143048876AC>A	Compound Heterozygote	NM_000083.3	c.2789del	p.Pro930Leufs*18	Myotonia congenita, dominant 160800 AD 3Myotonia congenita, recessive 255700 AR 3Myotonia levior, 160800-AD	Autosomal Recessive	Likely Pathogenic	PVS1_Moderate, PM2, PM3_Supporting, PP3, PP5	Inherited	Positive	PMID: 38374194	2015-07-25	No	___	SCV001755109
														Splicing	Known	Chr7:143020479G>A	Compound Heterozygote	NM_000083.3	c.774G>A	p.=			Likely Pathogenic	PM3_Strong, PM2, PP3			PMID: 38374194		No	___	SCV000927074
Case51	9400316	LGMD	Solo	Gene panel sequencing	Yes	Positive	Female	35 Y	Adulthood	Adulthood	Limb-girdle muscle weakness; Limb-girdle muscle atrophy; Calf muscle hypertrophy; Myopathic changes seen on EMG; Increased serum creatine kinase	Dystrophies	SGCA	Missense	Known	Chr17:48247606C>T	Potential Compound Heterozygote	NM_000023.4	c.850C>T	p.Arg284Cys	Muscular dystrophy, limb-girdle, autosomal recessive 3 608099 AR 3	Autosomal Recessive	Pathogenic	PS3_supporting, PM2, PM3_VeryStrong, PP3	Inherited	Positive	PMID: 38374194	2016-01-17	No	___	SCV001755380
														Missense	Known	Chr17:48245014C>T	Potential Compound Heterozygote	NM_000023.4	c.229C>T	p.Arg77Cys			Pathogenic	PS3_supporting, PM1, PM2, PM3_VeryStrong, PP3			PMID: 38374194		No	___	SCV001755381
Case52	9407808	Myotonia	Solo	Gene panel sequencing	No	Positive	Male	35 Y	Adulthood	Not reported	Muscle stiffness; Delayed relaxation of muscle fibers after contraction; Cold temperatures exacerbate symptoms; Muscle hypertrophy; Handgrip myotonia; Eyelid myotonia	Overlapping	CLCN1	Missense	Known	Chr7:143039069G>A	Compound Heterozygote	NM_000083.3	c.1630G>A	p.Val544Met	Myotonia congenita, dominant 160800 AD 3Myotonia congenita, recessive 255700 AR 3Myotonia levior,160800-AD	Autosomal Recessive	VUS	PM2, PP3	Inherited	VUS	PMID: 38374194	2016-02-27	CTG repeat expansion of DMPK gene for this individual was previously investigated by TP-PCR in Fazeli-Sanati genetic laboratory, by which the normal CTG repeat alleles ruled out the possibility of Myotonic Dystrophy Type 1 (DM1).	___	___
														Missense	Known	Chr7:143017768C>T	Compound Heterozygote	NM_000083.3	c.313C>T	p.Arg105Cys			VUS	PM2, PP3, PP5			PMID: 38374194		CTG repeat expansion of DMPK gene for this individual was previously investigated by TP-PCR in Fazeli-Sanati genetic laboratory, by which the normal CTG repeat alleles ruled out the possibility of Myotonic Dystrophy Type 1 (DM1).	___	___
Case53	9416956	LGMD	Solo	Gene panel sequencing	Yes	Positive	Female	13 Y	Childhood	Childhood	Proximal muscle weakness, lower and upper limbs; Lordosis; Calf muscle hypertrophy; Unsteady gait; Difficulties running and climbing stairs; Gowers’ sign	Dystrophies	SGCA	Missense	Known	Chr17:48247606C>T	Compound Heterozygote	NM_000023.4	c.850C>T	p.Arg284Cys	Muscular dystrophy, limb-girdle, autosomal recessive 3 608099 AR 3	Autosomal Recessive	Pathogenic	PS3_supporting, PM2, PM3_VeryStrong, PP3	Inherited	Positive	PMID: 38374194	2016-07-16	No	___	SCV001755380
														Frameshift	Known	Chr17:48245314GCCTACAATCGG>G	Compound Heterozygote	NM_000023.2	c.320_330del	p.Ala107Glyfs*4			Pathogenic	PVS1, PM2, PM3_Strong			PMID: 38374194		No	___	___
Case54	9417255	Muscular dystrophy	Solo	whole exome sequencing	Yes	Negative	Male	13 Y	Childhood	Childhood	Hypotonia at birth; High-arched palate; Muscle weakness, proximal; Joint contractures; Calf pseudohypertrophy; Wheelchair-bound. EMG is compatible with a myopathic process	Dystrophies	CRPPA	Missense	Known	Chr7:16460747T>A	Homozygote	NM_001101426.4	c.201A>T	p.Gln67His	Muscular dystrophy-dystroglycanopathy (congenital with brain and eye anomalies), type A, 7 614643 AR 3Muscular dystrophy-dystroglycanopathy (limb-girdle), type C, 7 616052 AR 3	Autosomal Recessive	VUS	PM1 PM2 PP3	Inherited	VUS	PMID: 38374194	2016-10-04	Multiplex Ligation Dependent Probe Amplification (MLPA) screening for deletions and duplications in Dystrophin gene was previously performed in this laboratory for this individual which revealed no Del/Dup in this patient.	___	___
												Myopathies	LMOD3	Missense	Known	Chr3:69168257T>A	Homozygote	NM_198271.5	c.1249A>T	p.Ile417Leu	Nemaline myopathy 10 616165 AR 3	Autosomal Recessive	VUS	PM2 BP1			PMID: 38374194		Multiplex Ligation Dependent Probe Amplification (MLPA) screening for deletions and duplications in Dystrophin gene was previously performed in this laboratory for this individual which revealed no Del/Dup in this patient.	___	___
Case55	9500566	Hereditary ataxia	Solo	Gene panel sequencing	Yes	Negative	Female	7 Y	Childhood	Childhood	Recurrent infections; Eye redness, telangiectasia; Ataxia, progressive; Increased levels of alpha fetoprotein	Hereditary Ataxia	ATM	Splicing	Novel	Chr11:108186841G>A	Compound Heterozygote	NM_000051.4	c.6198+1G>A	___	Ataxia-telangiectasia 208900 AR 3	Autosomal Recessive	Pathogenic	PVS1, PM2, PM3_VeryStrong	Inherited	Positive	___	2016-10-03	Aneuploidy screening for fetus- NL	___	SCV001755559
														Stop gain	Novel	Chr11:108121656G>A	Compound Heterozygote	NM_000051.4	c.1464G>A	p.Trp488*			Pathogenic	PVS1, PM2, PM3_Strong			___		Aneuploidy screening for fetus- NL	___	SCV001755560
Case56	9501556	Hereditary Neuropathy	Trio	whole exome sequencing	No	Negative	Male	2 M	Childhood	Childhood	Muscle weakness; Respiratory distress and Muscular hypotonia. EMG-NCV finding is compatible with axonal type sensorimotor poly neuropathy	Neuropathies	IGHMBP2	Missense	Known	Chr11:68702872G>A	Compound Heterozygote	NM_002180.3	c.1738G>A	p.Val580Ile	Charcot-Marie-Tooth disease, axonal, type 2S 616155 AR 3Neuronopathy, distal hereditary motor, type VI 604320 AR 3	Autosomal Recessive	Likely Pathogenic	PS3_Supporting, PM2, PM3_Strong, PP3	Inherited	Positive	PMID: 38374194	2016-10-24	No	___	SCV001755566
														Stop gain	Known	Chr11:68673588T>A	Compound Heterozygote	NM_002180.3	c.138T>A	p.Cys46*			Pathogenic	PVS1, PM2, PP5			PMID: 38374194		No	___	SCV001755567
Case57	9507245	Muscular dystrophy	Solo	whole exome sequencing	No	Negative	Male	8 Y	Childhood	Childhood	Developmental delay, mild; Proximal muscle weakness with mild wasting; Fasciculation of the pectoralis major; Prominent abdomen; Flat feet; Prominent Calcaneus; Round face; Short philtrum; Short nose; Anteverted nares; Prominent ears; Open mouth; Prominent and large teeth. Muscle biopsy revealed muscular dystrophy and EMG-NCV findings showed generalized severe sensory motor axonal neuropathy and …	Dystrophies	POMT1	Missense	Known	Chr9:134388716C>A	Compound Heterozygote	NM_007171.4	c.1239C>A	p.Asn413Lys	Muscular dystrophy-dystroglycanopathy (congenital with brain and eye anomalies), type A, 1 236670 AR 3Muscular dystrophy-dystroglycanopathy (congenital with mental retardation), type B, 1 613155 AR 3Muscular dystrophy-dystroglycanopathy (limb-girdle), type C, 1 609308 AR 3	Autosomal Recessive	VUS	PM2, PP3_Strong?, PM3_Supporting	Inherited	VUS	PMID: 38374194	2017-01-15	DMD analysis using multiplex PCR method for deletion and duplication screening in Dystrophin gene was previously performed in this laboratory for this individual which revealed no Del/Dup in this patient.	___	___
														Missense	Known	Chr9:134382773C>T	Compound Heterozygote	NM_007171.4	c.299C>T	p.Pro100Leu			VUS	PM2, PM3_Supporting, PP3			PMID: 38374194		DMD analysis using multiplex PCR method for deletion and duplication screening in Dystrophin gene was previously performed in this laboratory for this individual which revealed no Del/Dup in this patient.	___	___
Case58	9516519	Muscular dystrophy	Solo	whole exome sequencing	Yes	Positive	Male	27 Y	Adulthood	Adulthood	Fatigue while walking; Difficulty walking, climbing stairs & running; Difficulty rising from seated position; Proximal muscle weakness, progressive, leg>arm; Lordosis; Prominent calves, slight; Abnormal gait. Muscle biopsy findings were compatible with muscular dystrophy and EMG-NCV revealed myopathic process	Dystrophies	CAPN3	Stop gain	Known	Chr15:42691788TGTCTG>TC	Compound Heterozygote	NM_000070.3	c.1293_1297delinsC	p.Ser432*	Muscular dystrophy, limb-girdle, autosomal recessive 1 253600 AR	Autosomal Recessive	Likely Pathogenic	PVS1, PM2	Inherited	Positive	PMID: 38374194	2017-09-24	No	___	SCV001934156
														Inframe deletion	Known	Chr15:42681287CCATTGA>C	Compound Heterozygote	NM_000070.3	c.795_800del	p.Ile266_Asp267del			Likely Pathogenic	PM1, PM2, PM3, PM4, PP1			PMID: 38374194		No	___	SCV000240232
Case59	9518433	Myopathy	Solo	whole exome sequencing	No	Negative	Female	16 Y	Childhood	Childhood	Muscle weakness from the birth; Atonic seizures, between ages 5 to 12 years. Elevated level of CPK; MuSK<0.01; and Acetylcholin receptor: 0.3. Muscle biopsy findings showed myopathic atrophy with some degenerative/regenerative fibers as well as focal endomysial fibrosis with no prominent lipid or glycogen excess and EMG-NCV findings were compatible with myopathic process at proximal and distal mu…	Dystrophies	GMPPB	Missense	Known	Chr3:49759776A>G	Potential Compound Heterozygote	NM_013334.4	c.656T>C	p.Ile219Thr	Muscular dystrophy-dystroglycanopathy (congenital with brain and eye anomalies), type A 14- 615350- AR/Muscular dystrophy-dystroglycanopathy (congenital with mental retardation), type B 14- 615351- AR/Muscular dystrophy-dystroglycanopathy (limb-girdle), type C, 14- 615352- AR	Autosomal Recessive	Likely Pathogenic	PM1,PM2,PP2,PP3	Not checked	Positive	PMID: 38374194	2017-12-10	No	___	SCV001755298
														Missense	Known	Chr3:49759489C>T	Potential Compound Heterozygote	NM_013334.4	c.860G>A	p.Arg287Gln			Pathogenic	PM2, PP2, PM3_Strong, PS3_Supporting, PM5			PMID: 38374194		No	___	SCV001755397
Case60	9601336	CMT	Solo	whole exome sequencing	No	Positive	Male	20 Y	Adulthood	Not reported	Walking problem; Abnormal sensations, lower limbs, digits	Overlapping	DMD	Missense	Known	ChrX:31165585C>G	Hemizygote	NM_004006.3	c.10604G>C	p.Gly3535Ala	Becker muscular dystrophy 300376 XLR 3 Duchenne muscular dystrophy 310200 XLR 3	X-linked	VUS	PM2, PP3, BP1	Not checked	VUS	PMID: 32657593	2017-12-31	No	___	___
												Neuropathies	FBLN5	Missense	Known	Chr14:92347736G>C	Heterozygote	NM_006329.4	c.889C>G	p.His297Asp	Cutis laxa, autosomal dominant 2 614434 3Cutis laxa, autosomal recessive, type IA 219100 AR 3Macular degeneration, age-related, 3 608895 AD 3Neuropathy, hereditary, with or without age-related macular degeneration 608895 AD 3	Autosoaml Dominant	VUS	PM2, PP2, PP3			PMID: 32657593		No	___	SCV001167091
Case61	9603687	Hereditary ataxia	Solo	whole exome sequencing	No	Negative	Female	30 Y	Adulthood	Adulthood	Frequent fallings; Difficulty walking; Ataxic gait; Visual gaze (frozen eye, bilateral); Scoliosis, mild; Dysphagia; Oculomotor apraxia; Brain MRI: global brain atrophy in the supra and infra-tentorial region with high possibility of neurodegenerative disorders	Overlapping	SYNE1	Missense	Known	Chr6:152551688G>C	Compound Heterozygote	NM_182961.4	c.21189C>G	p.Asp7063Glu	Arthrogryposis multiplex congenita 3, myogenic type[#MIM:618484 ]/AR, Emery-Dreifuss muscular dystrophy 4, autosomal dominant[#MIM:612998]/AD, Spinocerebellar ataxia, autosomal recessive 8[#MIM:610743]/AR	Autosomal Recessive	VUS	PM2 BP1	Inherited	VUS	PMID: 38374194	2018-06-20	No	___	___
														Missense	Known	Chr6:152453279C>T	Compound Heterozygote	NM_182961.4	c.26072G>A	p.Ser8691Asn			VUS	PM2 BP1			PMID: 38374194		No	___	___
Case62	9605850	Muscular dystrophy	Solo	Gene panel sequencing	No	Negative	Male	5 Y	Childhood	Childhood	Reduced fetal movement, mild; Head up delay; Delayed walking and sitting; Pectus excavatum, mild; Abdominal protrusion, mild; Hyperlordosis, mild; Scoliosis, mild; Hypotonia; Muscle weakness, lower limbs>upper limbs; Flat feet; Difficulty climbing stairs; Muscle biopsy: muscular dystrophy; Elecated lecel of serum CK; EMG-NCV:infavor of myopathic process	Dystrophies	DMD	Missense	Known	ChrX:32663230A>T	Hemizygote	NM_004006.3	c.1000T>A	p.Leu334Met	Becker muscular dystrophy 300376 XLR 3 Duchenne muscular dystrophy 310200 XLR 3	X-linked	VUS	PM2 BP1	Inherited	VUS	PMID: 38374194	2018-05-21	.Multiple Ligation Dependent Probe Amplification (MLPA) screening for deletions and duplications in Dystrophin gene / no Del/Dup	___	___
													COL6A3	Missense	Known	Chr2:238285481T>C	Heterozygote	NM_004369.4	c.3004A>G	p.Ile1002Val	Bethlem myopathy 1 158810 AD, AR Dystonia 27 616411 AR Ullrich congenital muscular dystrophy 1 254090 AD, AR	Autosoaml Dominant	VUS	PM1 PM2			PMID: 38374194		.Multiple Ligation Dependent Probe Amplification (MLPA) screening for deletions and duplications in Dystrophin gene / no Del/Dup	___	___
Case63	9605943	Motor neuron disease	Solo	whole exome sequencing	Yes	Negative	Female	23 Y	Adulthood	Not reported	Speech problem; Attention deficit; Aggression; Muscle spasticity, upper limbs, mild; Drooling; Parkinson like gait; Pituitary gland MRI: microadenoma; Brain MRI: generalized atrophic changes and mild bilateral cortical and cerebellar atrophy	Motor Neuron Disease	DCTN1	Missense	Known	Chr2:74594221G>A	Homozygote	NM_004082.5	c.2267C>T	p.Ala756Val	Neuropathy, distal hereditary motor, type VIIB 607641 AD Perry syndrome 168605 AD {Amyotrophic lateral sclerosis, susceptibility to} 105400 AD, AR	Autosomal Recessive	VUS	PM2 PP3	Not checked	VUS	PMID: 38374194	2018-05-28	No	___	___
												Neuropathies	DNMT1	Splicing	Known	Chr19:10273343C>T	Heterozygote	NM_001130823.3	c.1008G>A	p.=	Cerebellar ataxia, deafness, and narcolepsy, autosomal dominant 604121 AD Neuropathy, hereditary sensory, type IE 614116 AD	Autosoaml Dominant	VUS	PM2?, PP3			PMID: 38374194		No	___	___
Case64	9607281	Congenital myotonia	Solo	Gene panel sequencing	No	Negative	Male	7 Y	Childhood	Childhood	Delayed relaxation of muscle fibers after contraction in hands; EMG-NCV findings compatible with myotonic process	Myotonic syndrome	CLCN1	Stop gain	Known	Chr7:143048771C>T	Compound Heterozygote	NM_000083.3	c.2680C>T	p.Arg894*	Myotonia congenita, dominant-160800-AD/Myotonia congenita, recessive-255700-AR/Myotonia levior, 160800-AD	Autosomal Recessive	Pathogenic	PVS1_Strong, PS3_Supporting, PM3_Strong, , PP3	Inherited	Positive	PMID: 38374194	2017-12-30	No	___	SCV001755308
														Splicing	Known	Chr7:143036719G>A	Compound Heterozygote	NM_000083.3	c.1582+5G>A	___			VUS	PM2, PP3, PM3			PMID: 38374194		No	___	___
Case65	9610769	CMS	Solo	Gene panel sequencing	Yes	Negative	Male	18 Y	Adulthood	Not reported	Bilateral congenital hearing loss; Generalized hypotonia, mild; Progressive muscle weakness; Posetive history for thymectomy	Neuromuscular junction disorders	GFPT1	Missense	Known	Chr2:69585463A>T	Homozygote	NM_001244710.2	c.541T>A	p.Leu181Met	Myasthenia, congenital, 12, with tubular aggregates-610542-AR	Autosomal Recessive	VUS	PM1,PM2,PP2	Not checked	VUS	PMID: 38374194	2018-02-26	No	___	___
														Missense	Known	Chr2:69575309T>A	Homozygote	NM_001244710.2	c.1003A>T	p.Met335Leu			VUS	PM2,PP2			PMID: 38374194		No	___	___
Case66	9611127	Metabolic myopathy	Solo	whole exome sequencing	Yes	Negative	Female	36 Y	Adulthood	Adulthood	Myopia; Muscle weakness, upper & lower limbs; Positive history for papillary thyroid Cancer; EMG-NCV: myopathic process with prominently spontaneous activity in all examined muscles; Antibodies to Gangliosids: negative; Elevated level of CPK & Aldolase; Muscle biopsy: lipid storage myopathy	Myopathies	PNPLA2	Frameshift	Known	Chr11:824688C>CT	Homozygote	NM_020376.4	c.1343dup	p.Cys449Leufs*103	Neutral lipid storage disease with myopathy 610717 AR	Autosomal Recessive	Likely Pathogenic	PM2 PM4 PP4	Not checked	Positive	PMID: 38374194	2018-06-24	No	___	SCV001755313
														Missense	Known	Chr11:819750C>T	Homozygote	NM_020376.4	c.32C>T	p.Ser11Leu			Likely Pathogenic	PM2, PP3, PP4, PM3			PMID: 38374194		No	___	SCV001755314
Case67	9611215	CMD	Solo	whole exome sequencing	Yes	Negative	Male	8 Y	Childhood	Childhood	Hypotonia since birth; Developmental Delay; Mental retardation, moderate to severe; Seizures; Generalized muscle weakness; Muscle atrophy; Decreased muscle force; No walking; EMG: myopathy; Muscle biopsy: prominent selective type 2 fibers atrophy; IHC: labeling with all examined antibodies	Hereditary Paraplegia	AP4E1	Splicing	Known	Chr15:51250992G>GTAAG	Compound Heterozygote	NM_007347.5	c.1851+2_1851+5dup	___	Spastic paraplegia 51, autosomal recessive 613744 ARStuttering, familial persistent, 1 184450 AD	Autosomal Recessive	VUS	PM2, PP3	Inherited	VUS	PMID: 38374194	2018-06-30	No	___	___
														Missense	Known	Chr15:51250689G>A	Compound Heterozygote	NM_007347.5	c.1549G>A	p.Val517Ile			VUS	PM2 PP3 PP5			PMID: 38374194		No	___	___
Case68	9611570	Muscular dystrophy	Solo	whole exome sequencing	No	Positive	Male	47 Y	Adulthood	Childhood	Muscle weakness; Difficulty walking; Wheelchair-bound since 6 years ago; Winged scapula; Limitation in abduction of both hands; Pes cavus; Stuttering; Muscle biopsy: muscular dystrophy; EMG-NCV: myopathic process	Dystrophies	CAPN3	Splicing	Known	Chr15:42703200T>G	Compound Heterozygote	NM_000070.3	c.2380+2T>G	___	Muscular dystrophy, limb-girdle, autosomal recessive 1 253600 AR	Autosomal Recessive	Likely Pathogenic	PVS1_Strong, PM2, PM3	Inherited	Positive	PMID: 38374194	2018-07-01	No	___	SCV001755391
														Missense	Known	Chr15:42691746C>T	Compound Heterozygote	NM_000070.3	c.1250C>T	p.Thr417Met			Pathogenic	PM1 PM2 PP2 PP3 PP5			PMID: 38374194		No	___	SCV001755319
Case69	9615172	CMT	Solo	whole exome sequencing	Yes	Negative	Male	29 Y	Adulthood	Childhood	Febrile convulsions; Muscle weakness; Difficulty walking & climbing stairs; Facial weakness, mild; Muscle wasting; Hand tremor; Foot drop; Pes cavus; Abnormal gait; An abnormality of the primary sensation that is mediated by peripheral nerves (pain, temperature, touch, vibration, joint position) (based on HPO nomenclature). EMG-NCV: chronic demyelinating sensorimotor polyneuropathy	Neuropathies	GJB1	Missense	Known	ChrX:70444011G>A	Hemizygote	NM_000166.6	c.454G>A	p.Val152Ile	Charcot-Marie-Tooth neuropathy, X-linked dominant, 1 302800 XLD	X-linked	VUS	PM1 PM2 PP2 BP4	Not checked	VUS	PMID: 32657593, PMID: 26076878	2018-09-06	DNA sequencing of the MFN2 gene for this individual/no mution	___	___
												Overlapping	KIF5A	Missense	Known	Chr12:57969522G>A	Heterozygote	NM_004984.4	c.2005G>A	p.Ala669Thr	Myoclonus, intractable, neonatal 617235 AD Spastic paraplegia 10, autosomal dominant 604187 AD {Amyotrophic lateral sclerosis, susceptibility to, 25} 617921 AD	Autosoaml Dominant	VUS	PM2 PP2 PP3			PMID: 38374194		DNA sequencing of the MFN2 gene for this individual/no mution	___	SCV001167090
Case70	9617432	NMD	Solo	whole exome sequencing	Yes	Negative	Female	31 Y	Adulthood	Not reported	Muscle pain; Early fatigue while rigorous activities; Bone tumor (benign) in skull; CPK:1133; LDH:621; Alk ph:14.1; ; Muscle biopsy: chronic mixed myopathic and neurogenic atrophy with prominent reinnervation process associated with slight increased in lipid content of some muscle fibers; IHC: Sarcolemmal labelling with all examined antibodies; MRI of left femur: Mild fatty degeneration in all mu…	Myopathies	ACADVL	Missense	Known	Chr17:7127172T>C	Potential Compound Heterozygote	NM_001270447.2	c.1379T>C	p.Met460Thr	VLCAD deficiency 201475 AR	Autosomal Recessive	Likely Pathogenic	PM1 PM2 PM3_Supporting PP3	Not checked	Positive	PMID: 38374194	2018-07-23	No	___	SCV001755482
														Frameshift	Known	Chr17:7125611GG>G	Potential Compound Heterozygote	NM_001270447.1	c.938del	p.Gly313Alafs*63			Likely Pathogenic	PVS1 PM2			PMID: 38374194		No	___	SCV001755483
Case71	9702578	CMT	Solo	whole exome sequencing	No	Negative	Male	12 Y	Childhood	Childhood	Onset at the age of 5-year old with difficulty walking and frequent falls; Difficulty walking, running, climbing steps and rising from seated position; Distal muscle weakness & wasting, leg>arm; Laxity in fingers, wrist & elbows; Foot drop, bilateral; Postural deformities in feet & ankles; Abnormal gait; Respiratory problem; Thenar & hypothenar muscle atrophy; EMG-NCV: chronic sensorimotor demyel…	Overlapping	SETX	Missense	Known	Chr9:135218103A>C	Homozygote	NM_015046.7	c.472T>G	p.Leu158Val	Amyotrophic lateral sclerosis 4, juvenile, 602433, AD Spinocerebellar ataxia, autosomal recessive, with axonal neuropathy 2, 606002, AR	Autosomal Recessive	VUS	PP4?, PP5?	Not checked	VUS	PMID: 38374194	2020-02-25	No	___	___
													TTN	Missense	Known	Chr2:179397484G>A	Heterozygote	NM_001267550.2	c.103858C>T	p.Arg34620Cys	Cardiomyopathy, dilated, 1G, 604145 Cardiomyopathy, familial hypertrophic, 9,613765, AD Muscular dystrophy, limb-girdle, autosomal recessive 10,608807 AR Myopathy, myofibrillar, 9, with early respiratory Failure, 603689, AD Salih myopathy, 611705, AR Tibial muscular dystrophy, tardive, 600334, AD	Autosoaml Dominant	VUS	PM2, PP3, BP1			PMID: 38374194		No	___	___
Case72	9703502	Hereditary ataxia	Solo	whole exome sequencing	Yes	Negative	Female	29 Y	Adulthood	Childhood	Ataxia; Hand tremor; Dysarthria; Brain MRI: marked cerebellar atrophy	Hereditary Ataxia	VWA3B	Frameshift	Novel	Chr2:98744758TC>T	Potential Compound Heterozygote	NM_144992.4	c.760del	p.Leu254Serfs*25	Spinocerebellar ataxia, autosomal recessive 22 616948 AR	Autosomal Recessive	VUS	PM2, PP3	Not checked	VUS	___	2018-11-12	Investigation of GAA expansion repeats of the FXN gene-normal	___	___
														Stop gain	Novel	Chr2:98736048C>T	Potential Compound Heterozygote	NM_144992.5	c.364C>T	p.Arg122*			VUS	PM2, PP3			___		Investigation of GAA expansion repeats of the FXN gene-normal	___	___
Case73	9703621	CMS	Solo	Gene panel sequencing	No	Negative	Male	26 Y	Adulthood	Childhood	Esophageal stenosis; Difficulty walking, rising from seated position and climbing steps; Genu varum; Ptosis; Thin build; Difficulty chewing; Upper muscle weakness; Clinodactyly; Dyspnea; Hyperpigmentation on back. Thighs MRI: mild subcutaneous fat thickening of both thighs; Legs MRI: prominent grade II a spotty fat strand deposition are seen in bilateral superficial posterior compartment in soleu…	Neuromuscular junction disorders	AGRN	Stop gain	Known	Chr1:977481G>A	Compound Heterozygote	NM_198576.4	c.1323G>A	p.Trp441*	Myasthenic syndrome, congenital, 8, with pre- and postsynaptic defects 615120 AR 3	Autosomal Recessive	Pathogenic	PVS1,PM2,PM3	Inherited	Positive	PMID: 38374194	2019-01-27	No	___	SCV001755194
														Missense	Known	Chr1:957797C>T	Compound Heterozygote	NM_198576.4	c.418C>T	p.Arg140Trp			VUS	PM2,PM3,PP3, PP4?			PMID: 38374194		No	___	___
Case74	9706601	Congenital myopathy	Solo	whole exome sequencing	No	Negative	Male	1 Y	Childhood	Childhood	Hypotonia; Motor delay; No speech; Strabismus; 5th finger skin tag in hands; Elevated level of serum CK; EMG-NCV: myopathic process; Muscle biopsy: congenital muscular dystrophy other than merosin-deficient; Brain MRI: mild subdural hygroma of fronto-temporo-parietal.	Dystrophies	GMPPB	Missense	Known	Chr3:49759777T>A	Potential Compound Heterozygote	NM_013334.4	c.655A>T	p.Ile219Phe	Muscular dystrophy-dystroglycanopathy (congenital with brain and eye anomalies), type A, 14 615350 AR 3Muscular dystrophy-dystroglycanopathy (congenital with mental retardation), type B, 14 615351 AR 3Muscular dystrophy-dystroglycanopathy (limb-girdle), type C, 14 615352 AR 3	Autosomal Recessive	Likely Pathogenic	PM1, PM2,PM5, PP3	Not checked	Positive	PMID: 38374194	2019-04-15	No	___	SCV001755337
														Missense	Known	Chr3:49759489C>T	Potential Compound Heterozygote	NM_013334.4	c.860G>A	p.Arg287Gln			Pathogenic	PM2, PP2, PM3_Strong, PS3_Supporting, PM5			PMID: 38374194		No	___	SCV001755397
Case75	9708697	Hereditary ataxia	Solo	whole exome sequencing	No	Negative	Male	24 Y	Adulthood	Childhood	Spastic ataxia, Charlevoix-Saguenay type[#MIM:270550], AR	Hereditary Ataxia	SACS	Splicing	Novel	Chr13:23928656A>T	Compound Heterozygote	NM_014363.6	c.2093+2T>A	___	Spastic ataxia, Charlevoix-Saguenay type[#MIM:270550], AR	Autosomal Recessive	Likely Pathogenic	PVS1-PM2	Inherited	Positive	___	2022-07-07	Triplet primed PCR analysis (TP-PCR) of the GAA repeat within intron 1 of the FXN gene (NM_000144.4),using non- overlapping primers, previously performed in All Wales Molecular Genetics Laboratory, does not confirm a diagnosis of Friedreich ataxia in this individual.	___	___
														Frameshift	Novel	Chr13:23908386TCAAA>T	Compound Heterozygote	NM_014363.6	c.9625_9628delTTTG	p.Phe3209Thrfs*46			Likely Pathogenic	PVS1-PM2			___		Triplet primed PCR analysis (TP-PCR) of the GAA repeat within intron 1 of the FXN gene (NM_000144.4),using non- overlapping primers, previously performed in All Wales Molecular Genetics Laboratory, does not confirm a diagnosis of Friedreich ataxia in this individual.	___	___
Case76	9711699	Myopathy	Solo	whole exome sequencing	Yes	Negative	Female	18 Y	Adulthood	Childhood	Onset since 4-5-year ago with difficulty climbing steps; Difficulty rising from seated position; Elevated level CK, LDH, ALT & AST; Hypotrophy of calves; Long distance between 2nd & 3rd toes; Hip girdle muscular weakness; Heart echo with mild abnormality; Muscle biopsy: inflammatory myopathy.	Dystrophies	CAPN3	Missense	Known	Chr15:42691839G>T	Compound Heterozygote	NM_000070.3	c.1343G>T	p.Arg448Leu	Muscular dystrophy, limb-girdle, autosomal recessive 1 253600 AR	Autosomal Recessive	Pathogenic	PM1, PM2, PM5, PP3, PM3_Strong	Inherited	Positive	PMID: 38374194	2019-08-03	No	___	SCV001755643
														Frameshift	Known	Chr15:42681209TT>T	Compound Heterozygote	NM_000070.3	c.717del	p.Phe239Leufs*14			Pathogenic	PVS1, PM2, PM3			PMID: 38374194		No	___	SCV001755644
Case77	9713290	Hereditary paraplagia	Solo	whole exome sequencing	Yes	Negative	Female	20 Y	Adulthood	Childhood	Myopia; Amblyopia; Ataxia; Mild atrophy of thenar & hypothenar muscles; Lower limb spasticity & weakness; Borderline learning disability; Urinary urgency; Tip-toe walking; Spastic gait; Dysarthria; Brain MRI: bilateral periventricular cerebral white matter disease, severe thinning of genu and major ant body of corpus callosum, atrophy; EMG-NCV:R/O familial spastic paraparesia.	Hereditary Paraplegia	SPG11	Frameshift	Known	Chr15:44891033T>TG	Compound Heterozygote	NM_025137.4	c.3687_3688insC	p.Ile1230Hisfs*7	Spastic paraplegia 11, autosomal recessive [#MIM: 604360].	Autosomal Recessive	Pathogenic	PVS1, PM2, PM3	Inherited	Positive	PMID: 38374194	2019-08-10	No	___	SCV001755647
														Frameshift	Known	Chr15:44861659GTA>G	Compound Heterozygote	NM_025137.4	c.6520_6521del	p.Tyr2174Hisfs*3			Pathogenic	PVS1, PM2, PM3			PMID: 38374194		No	___	SCV001755648
Case78	9800600	Atrophy & Psychomotor delay	Solo	whole exome sequencing	Yes	Positive	Female	24 Y	Adulthood	Childhood	Psychomotor delay, severe; Seizures; Severe MR; No speech; Hand clenching; No walking; Microcephaly; Episodes of nausea and vomiting; Short stature; Thin build; Drooling; Growth delay; Limbs spasticity; Difficulty swallowing and chewing; Open mouth; Spastic gait; Brain MRI: neurodegenerative disorders and pontocerebellar atrophy; EEG: mildly abnormal.	Overlapping	SACS	Missense	Known	Chr13:23910865C>T	Potential Compound Heterozygote	NM_014363.6	c.7150G>A	p.Glu2384Lys	Spastic ataxia, Charlevoix-Saguenay type, AR[#MIM:270550]	Autosomal Recessive	VUS	PM2, PP3	Not checked	VUS	PMID: 38374194	2019-09-17	No	___	___
														Missense	Known	Chr13:23907918T>C	Potential Compound Heterozygote	NM_014363.6	c.10097A>G	p.His3366Arg			VUS	PM2			PMID: 38374194		No	___	___
Case79	9801467	Muscular dystrophy	Solo	whole exome sequencing	No	Positive	Female	28 Y	Adulthood	Adulthood	Onset:19-year old; Weakness, lower & upper limbs; Lordosis; Muscle weakness, distal>proximal; Difficulty walking; Waddling gait; Femur MRI: marked fatty degeneration due to myopathy; Muscle biopsy: compatible with muscular dystrophy; EMG-NCV:LGMD or myelopathy, myogenic, inflammatory or endocrine; Heart echo: trivial TR.	Dystrophies	CAPN3	Splicing	Known	Chr15:42701579G>T	Potential Compound Heterozygote	NM_000070.3	c.1992+1G>T	___	Muscular dystrophy, limb-girdle, autosomal recessive 1 253600 AR	Autosomal Recessive	Pathogenic	PVS1_Moderate,PM2,PM3_VeryStrong	Not checked	Positive	PMID: 38374194	2019-09-24	No	___	SCV001755543
														Missense	Known	Chr15:42684900T>C	Potential Compound Heterozygote	NM_000070.3	c.1009T>C	p.Ser337Pro			Likely Pathogenic	PM1,PM2,PM3_Supporting, PP3			PMID: 38374194		No	___	SCV001755200
Case80	9802684	SMA	Solo	whole exome sequencing	No	Negative	Female	26 Y	Adulthood	Childhood	Low birth weight; Development delay, motor; Muscle weakness; Abnormal gait; Polyneuropathy; EMG-NCV: chronic ant horn cell disease or poly radiculopathy.	Dystrophies	COL6A2	Splicing	Known	Chr21:47545690G>A	Compound Heterozygote	NM_001849.4	c.1970-9G>A	___	?Myosclerosis, congenital, 255600, AR Bethlem myopathy 1, 158810, AD, AR Ullrich congenital muscular dystrophy 1, 254090, AD, AR	Autosomal Recessive	Pathogenic	PS3_Supporting, PM2, PM3_VeryStrong, PP3	Inherited	Positive	PMID: 38374194	2019-12-19	No	___	SCV001755351
														Frameshift	Known	Chr21:47537786AG>A	Compound Heterozygote	NM_001849.4	c.1055del	p.Gly352Alafs*56			Pathogenic	PVS1, PM2, PM3			PMID: 38374194		No	___	___
Case81	9802919	Muscular dystrophy	Solo	whole exome sequencing	Yes	Negative	Male	16 Y	Childhood	Childhood	Elevated level of CPK since last year; Elevated level of Aldolase, SGOT & SGPT. EMG-NCV: myopathic process.	Overlapping	ANO5	Missense	Known	Chr11:22272376C>T	Compound Heterozygote	NM_213599.3	c.1103C>T	p.Thr368Met	Miyoshi muscular dystrophy 3, AR [MIM#613319] or Muscular dystrophy, limb-girdle, autosomal recessive 12 [MIM#611307].	Autosomal Recessive	VUS	PM2, PP3, PM3_Strong?	Inherited	Positive	PMID: 38374194	2019-11-24	No	___	___
														Frameshift	Known	Chr11:22247538AAAAGA>A	Compound Heterozygote	NM_213599.3	c.304_308del	p.Lys102Valfs*2			Pathogenic	PVS1 PM2 PM3			PMID: 38374194		No	___	SCV001755343
Case82	9803048	Hereditary Neuropathy	Solo	whole exome sequencing	Yes	Positive	Male	48 Y	Adulthood	Not reported	Lower & upper limbs neuropathy; Difficulty walking; Abnormality of the cardiovascular system; EDX: severe chronic demyelinating sensory motor polyneuropathy with secondary axonal loss.	Neuropathies	HARS1	Splicing	Known	Chr5:140070796T>G	Potential Compound Heterozygote	NM_002109.6	c.90+4A>C	___	Charcot-Marie-Tooth disease, axonal, type 2W [#MIM:616625], AD and Usher syndrome type 3B [#MIM:614504], AR.	Autosomal Recessive	VUS	PM2	Not checked	Positive	PMID: 38374194	2016-11-16	No	___	___
														Missense	Known	Chr5:140054329T>G	Potential Compound Heterozygote	NM_002109.6	c.1393A>C	p.Ile465Leu			Likely Pathogenic	PS3_Supporting, PM2, PP2, PP3, PM3_Supporting			PMID: 38374194		No	___	SCV001755342
Case83	9803665	Muscular dystrophy	Solo	whole exome sequencing	No	Positive	Male	47 Y	Adulthood	Childhood	Onset since 10-year ago; Lordosis; Muscle weakness, proximal; Waddling gait; Elevated LFT & CPK; Muscle biopsy: muscular dystrophy; EMG-NCV: irritable chronic myopathy.	Dystrophies	CAPN3	Missense	Known	Chr15:42693931G>A	Potential Compound Heterozygote	NM_000070.3	c.1447G>A	p.Ala483Thr	Muscular dystrophy, limb-girdle, autosomal recessive 1 253600 AR	Autosomal Recessive	Likely Pathogenic	PM1, PM2, PM3_Supporting, PM5, PP2, PP3	Not checked	Positive	PMID: 38374194	2020-01-16	Multiplex Ligation Dependent Probe Amplification (MLPA) screening for deletions and duplications in Dystrophin gene was previously performed in this laboratory for this individual which revealed no Del/Dup in this patient.	___	SCV001755510
														Missense	Known	Chr15:42691814C>T	Potential Compound Heterozygote	NM_000070.3	c.1318C>T	p.Arg440Trp			Pathogenic	PM1, PM2, PM3_Strong, PM5, PP2, PP3			PMID: 38374194		Multiplex Ligation Dependent Probe Amplification (MLPA) screening for deletions and duplications in Dystrophin gene was previously performed in this laboratory for this individual which revealed no Del/Dup in this patient.	___	SCV001755540
Case84	9805946	LGMD	Solo	whole exome sequencing	No	Negative	Female	28 Y	Adulthood	Adulthood	Onset at the age of 21-y/o with proximal & distal muscle weakness, lower limbs; Elevated level CPK; EMG-NCV: inflammatory polymyopathy ; Muscle biopsy: slight myopathic atrophy with necrotic and degenerative/regenerative fibers; Elevated LFT.	Dystrophies	DYSF	Missense	Known	Chr2:71909727C>T	Compound Heterozygote	NM_003494.4	c.6124C>T	p.Arg2042Cys	Miyoshi muscular dystrophy 1 254130 AR 3Muscular dystrophy, limb-girdle, autosomal recessive 2 253601 AR 3Myopathy, distal, with anterior tibial onset 606768 AR 3	Autosomal Recessive	Pathogenic	PS3_Suporting, PM2, PM3_VeryStrong, PP3	Inherited	Positive	PMID: 38374194	2020-03-01	No	___	SCV001755661
														Stop gain	Known	Chr2:71797809C>T	Compound Heterozygote	NM_003494.4	c.3112C>T	p.Arg1038*			Pathogenic	PVS1, PM2, PM3_VeryStrong			PMID: 38374194		No	___	SCV001755662
Case85	9806989	SMA	Trio	whole exome sequencing	No	Negative	Male	3 Y	Childhood	Childhood	Deceased child with mild hypotonia; lower limb weakness; difficulty walking & abnormal gait; seizure (once); long face; open mouth; EMG-NCV: myopathic process.	Myopathies	NEB	Stop gain	Known	Chr2:152419208G>A	Compound Heterozygote	NM_001271208.1	c.18808C>T	p.Arg6270*	Nemaline myopathy 2, autosomal recessive [#MIM:256030]	Autosomal Recessive	Pathogenic	PVS1,PM2,PP3,PP5	Inherited	Positive	PMID: 27933661, PMID: 20207543, PMID: 27159402, PMID: 25205138, PMID: 11071490, PMID: 22367672	2020-10-12	Multiplex Ligation Dependent Probe Amplification (MLPA) screening for deletions of SMN1 gene was previously performed in this laboratory for this individual which revealed no deletion in this patient.	___	___
														Synonymous	Known	Chr2:152408252C>T	Compound Heterozygote	NM_001271208.1	c.19944G>A	p.Ser6648=			Likely Pathogenic	PVS1,PM2			PMID: 27933661, PMID: 20207543, PMID: 27159402, PMID: 25205138, PMID: 11071490, PMID: 22367672		Multiplex Ligation Dependent Probe Amplification (MLPA) screening for deletions of SMN1 gene was previously performed in this laboratory for this individual which revealed no deletion in this patient.	___	___
Case86	9807267	Myopathy	Solo	whole exome sequencing	Yes	Positive	Male	46 Y	Adulthood	Adulthood	Onset at the age of 34-year old with frequent fallings; Difficulty walking, running, climbing stairs & rising from seated position; Upper & lower limbs weakness; Proximal & distal muscle weakness, severe, legs>arms; Limbs muscle wasting; Not able to raise hands; Pos. Gowers’ sign; Wheelchair-bound; Urinary and fecal incontinence; CPK:460; LDH: 310; Muscle biopsy: myopathy with rimmed vacuoles and…	Overlapping	TTN	Missense	Known	Chr2:179457995C>T	Potential Compound Heterozygote	NM_001267550.2	c.58940G>A	p.Gly19647Glu	Cardiomyopathy, dilated, 1G ,604145 ,Cardiomyopathy, familial hypertrophic, 9 ,613765 ,AD ,Muscular dystrophy, limb-girdle, autosomal recessive 10 ,608807 ,AR ,Myopathy, myofibrillar, 9, with early respiratory failure ,603689 ,AD , Salih myopathy ,611705 ,AR , Tibial muscular dystrophy, tardive ,600334 ,AD	Autosomal Recessive	VUS	PM2, BP1	Not checked	VUS	PMID: 38374194	2020-02-15	No	___	___
														Missense	Known	Chr2:179440757T>C	Potential Compound Heterozygote	NM_001267550.2	c.70102A>G	p.Ile23368Val			VUS	PM2, BP1			PMID: 38374194		No	___	___
Case87	9807352	Muscular dystrophy	Solo	whole exome sequencing	Yes	Positive	Female	25 Y	Adulthood	Childhood	Onset at the age of 13-year old with hypertrophy of calves; Difficulty toe-walking; Difficulty climbing stairs & rising from seated position; Muscle weakness, lower>upper limbs; Positive Gowers’ sign; CPK:6000; IHC: compatible with Dysferlinopathy; Muscle biopsy: compatible with muscular dystrophy; EMG-NCV: compatible with myopathic process involving both lower limbs.	Dystrophies	DYSF	Frameshift	Known	Chr2:71825749G>GG	Potential Compound Heterozygote	NM_003494.4	c.3576dup	p.Asn1193Glufs*4	Miyoshi muscular dystrophy 1 254130 AR 3Muscular dystrophy, limb-girdle, autosomal recessive 2 253601 AR 3Myopathy, distal, with anterior tibial onset 606768 AR 3	Autosomal Recessive	Pathogenic	PVS1, PM2, PM3_Supporting, PP4	Not checked	Positive	PMID: 38374194	2020-02-17	No	___	SCV001755655
														Frameshift	Known	Chr2:71795360A>AC	Potential Compound Heterozygote	NM_003494.4	c.2706dup	p.Lys903Glnfs*4			Pathogenic	PVS1, PM2, PM3_Strong, PP4			PMID: 38374194		No	___	SCV001755403
Case88	9807835	Muscular dystrophy	Solo	whole exome sequencing	Yes	Positive	Male	35 Y	Adulthood	Childhood	Onset:13-year old with early fatigue and lower limbs weakness; Abnormal gait; Lordosis, severe; Difficulty walking, running & climbing stairs; Pos Gowers sign; Prominent calves; Proximal > distal muscle weakness, legs>arms; Wasting in legs, upper part; Elevated level of CPK (2820); EMG-NCV: chronic myopathic pattern.	Myopathies	NEB	Missense	Known	Chr2:152548389G>C	Compound Heterozygote	NM_001271208.2	c.2200C>G	p.Gln734Glu	Nemaline myopathy 2, autosomal recessive, 256030, AR, Arthrogryposis multiplex congenita 6 619334 AR	Autosomal Recessive	VUS	PM2, PM3, BP1	Inherited	Positive	PMID: 38374194	2020-02-24	No	___	___
														Stop gain	Known	Chr2:152352874G>C	Compound Heterozygote	NM_001271208.2	c.24507C>G	p.Tyr8169*			Pathogenic	PVS1, PM2, PM3_Supporting			PMID: 38374194		No	___	SCV001755659
Case89	9809215	Muscular dystrophy	Solo	whole exome sequencing	No	Negative	Male	14 Y	Childhood	Childhood	Developmental delay, motor & speech; Long face; Low set ear; Ataxia; Hypotonia; ADHD; Muscle weakness; Muscular dystrophy; Muscle pain without cramps; Elevated level of CPK; PCR analysis did not detect expansion of CGG repeats in this individual.	Dystrophies	POMT1	Stop gain	Known	Chr9:134385788C>T	Potential Compound Heterozygote	NM_007171.4	c.907C>T	p.Gln303*	Muscular dystrophy-dystroglycanopathy (congenital with brain and eye anomalies), type A, 1, 236670, AR;Muscular dystrophy-dystroglycanopathy (congenital with mental retardation), type B, 1, 613155, AR;Muscular dystrophy-dystroglycanopathy (limb-girdle), type C, 1, 609308, AR	Autosomal Recessive	Pathogenic	PVS1, PM2, PM3_Supporting	Not checked	Positive	PMID: 38374194	2020-04-04	No	___	SCV001755217
														Missense	Known	Chr9:134385361T>C	Potential Compound Heterozygote	NM_007171.4	c.677T>C	p.Leu226Pro			VUS	PM2, PP3, PM3_Supporting			PMID: 38374194		No	___	___
Case90	9809257	Myopathy	Solo	whole exome sequencing	Yes	Negative	Female	39 Y	Adulthood	Adulthood	Onset at the age of 24-year old with muscle cramps in calves; Muscle weakness, distal>proximal, lower>upper limbs; Mild wasting in distal of legs; Bilateral foot drop; Ankle deformity; Difficulty walking, running, climbing steps and rising from seated position; Mild facial weakness; Wheelchair bound since last year; EMG-NCV: myopathic process; Metastatic breast cancer (bone).	Overlapping	TTN	Stop gain	Known	Chr2:179600451C>A	Potential Compound Heterozygote	NM_001267550.2	c.14722G>T	p.Glu4908*	Cardiomyopathy, dilated, 1G, 604145; Cardiomyopathy, familial hypertrophic, 9, 613765, AD;Muscular dystrophy, limb-girdle, autosomal recessive 10, 608807, AR;Myopathy, myofibrillar, 9, with early respiratory failure, 603689, AD;Salih myopathy, 611705, AR;Tibial muscular dystrophy, tardive, 600334, AD	Autosomal Recessive	Likely Pathogenic	PVS1_Strong?, PM2	Not checked	Positive	PMID: 38374194	2020-04-04	No	___	SCV001934176
														Stop gain	Known	Chr2:179391789C>A	Potential Compound Heterozygote	NM_001267550.2	c.107926G>T	p.Glu35976*			VUS	PVS1_Moderate, PM2, PM3_Supporting			PMID: 38374194		No	___	___
Case91	9809914	Muscular dystrophy	Solo	whole exome sequencing	No	Negative	Female	21 Y	Adulthood	Childhood	Onset age: 13-year old with arthritis & elevated level of CPK; Muscle weakness, legs>arms, proximal>distal; Difficulty walking, running & climbing steps; Abnormal ataxic gait, mild; Flat feet; Loss of tip-toe walking; CPK:3000-8000; EMG-NCN: myopathic change; IHC: dysferlinopathy; Muscle biopsy: muscular dystrophy; Pelvic MRI: Polymyositis; Thighs and legs MRI: fat deposition/replacement.	Dystrophies	DYSF	Splicing	Known	Chr2:71886007G>A	Potential Compound Heterozygote	NM_003494.4	c.4639-1G>A	___	Miyoshi muscular dystrophy 1 254130 AR 3Muscular dystrophy, limb-girdle, autosomal recessive 2 253601 AR 3Myopathy, distal, with anterior tibial onset 606768 AR 3	Autosomal Recessive	Likely Pathogenic	PVS1_Strong, PM2, PM3_Supporting, PP4	Not checked	Positive	PMID: 38374194	2020-04-18	No	___	SCV001755666
														Large CNV deletion	Known	Chr2:71753347-71755533del	___	NM_003494.4	Exons 12-13	___		___	VUS	PVS1_Strong?, PM2			PMID: 38374194		No	No	___
Case92	9811943	Metabolic myopathy	Solo	whole exome sequencing	No	Positive	Female	33 Y	Adulthood	Adulthood	Onset since 6-mo ago with weakness extended to lower limbs; Difficulty walking, running & climbing steps; Upper limbs weakness; Proximal & distal muscle weakness, leg>arm; Abnormal gait; Mild prominent calves; CPK ranges from 63 to 1210; EMG-NCV: myopathy; Muscle biopsy: suggestive of lipid storage disease.	Myopathies	ETFDH	Missense	Known	Chr4:159620278T>G	Potential Compound Heterozygote	NM_004453.4	c.1112T>G	p.Phe371Cys	Glutaric acidemia IIC [#MIM: 231680], AR	Autosomal Recessive	Likely Pathogenic	PM2, PM3_Supporting, PP2, PP3	Not checked	Positive	PMID: 38374194	2020-10-08	No	___	SCV001755362
														Stop gain	Known	Chr4:159601705C>T	Potential Compound Heterozygote	NM_004453.4	c.121C>T	p.Arg41*			Pathogenic	PVS1, PM2, PM3			PMID: 38374194		No	___	SCV001755363
Case93	9812204	Myopathy	Solo	whole exome sequencing	No	Negative	Male	5 Y	Childhood	Childhood	Developmental delay, motor & speech; Lethargy; ADHD; Congenital cataract; Club foot, bilateral; Myopathy; EMG-NCV: myopathy; Brain MRI: lens is not seen in both globes, bright signal in right side of pons.	Dystrophies	GMPPB	Missense	Known	Chr3:49760499G>A	Compound Heterozygote	NM_021971.4	c.308C>T	p.Pro103Leu	Muscular dystrophy-dystroglycanopathy (congenital with brain and eye anomalies), type A, 14; 615350; AR Muscular dystrophy-dystroglycanopathy (congenital with mental retardation), type B, 14; 615351; AR Muscular dystrophy-dystroglycanopathy (limb-girdle), type C, 14; 615352; AR	Autosomal Recessive	Likely Pathogenic	PM2, PP2, PP3, PM3	Inherited	Positive	PMID: 38374194	2020-07-18	No	___	SCV001755395
														Frameshift	Known	Chr3:49760130CTG>C	Compound Heterozygote	NM_021971.4	c.458_459del	p.Thr153Argfs*17			Likely Pathogenic	PVS1_Strong, PM2, PM3			PMID: 38374194		No	___	SCV001755680
Case94	9812482	CMS	Solo	whole exome sequencing	No	Negative	Male	25 Y	Adulthood	Childhood	Onset at the age of 2-year old with waddling gait & weakness of muscle limbs; Mild ptosis, Lt.; Generalized muscle weakness, proximal>distal; EMG-NCV: congenital myasthenic syndrome or myopathic disorder.	Neuromuscular junction disorders	LRP4	Missense	Known	Chr11:46897356T>G	Potential Compound Heterozygote	NM_002334.4	c.3698A>C	p.Glu1233Ala	?Myasthenic syndrome, congenital, 17 [MIM#616304], AR	Autosomal Recessive	Likely Pathogenic	PS3_Supporting, PM2, PM3, PM5, PP2, PP3	Not checked	Positive	PMID: 38374194	2020-09-07	No	___	SCV001755371
														Splicing	Known	Chr11:46890685T>C	Potential Compound Heterozygote	NM_002334.4	c.4693-2A>G	___			VUS	PVS1_supporting, PM2, PM3_Supporting			PMID: 38374194		No	___	___
Case95	9813175	Muscular dystrophy	Solo	whole exome sequencing	No	Positive	Female	33 Y	Adulthood	Childhood	Onset at the age of 14-year old; Developmental delay, motor & speech; Muscular dystrophy, severe and progressive; Muscle weakness; Inability to walk; Difficulty rising from seated position; ADHD; EMG-NCV of her brother: muscular dystrophy.	Dystrophies	CAPN3	Missense	Known	Chr15:42691815G>A	Potential Compound Heterozygote	NM_000070.3	c.1319G>A	p.Arg440Gln	Muscular dystrophy, limb-girdle, autosomal recessive 1 253600 AR	Autosomal Recessive	Pathogenic	PS3_Supporting, PM1, PM2, PP2, PP3, PM3_Strong, PM5	Not checked	Positive	PMID: 38374194	2020-12-07	No	___	SCV001755678
														Missense	Known	Chr15:42652149G>A	Potential Compound Heterozygote	NM_000070.3	c.146G>A	p.Arg49His			Pathogenic	PM2, PP3, PP2, PM3_Strong, PM5			PMID: 38374194		No	___	SCV001755679
Case96	9903846	Megalencephalic Leukoencephalopathy (MLC type)	Solo	whole exome sequencing	Yes	Negative	Male	3 Y	Childhood	Childhood	Speech problem; Mild MR; Seizures; Abnormal white matter in brain MRI; Magnetic resonance spectroscopy suggestive of leukodystrophy, metachromatic; Ataxia while fast walking; Mild laxity in fingers, wrists & elbows; Prominent forehead; Flat feet; Bilateral sandal gaps; Thin build.	Dystrophies	LAMA2	Splicing	Known	Chr6:129775426G>C	Potential Compound Heterozygote	NM_000426.3	c.6700G>C	___	Muscular dystrophy, limb-girdle, autosomal recessive 23 [#618138] AR , Muscular dystrophy, congenital,	Autosomal Recessive	VUS	[PM1,PM2,PP3,BP1]	Not checked	Positive	___	2020-11-24	No	___	___
														Stop gain	Known	Chr6:129637306C>T	Potential Compound Heterozygote	NM_000426.3	c.4048C>T	p.Arg1350*			Pathogenic	[PVS1,PM2,PP3,PP5]			___		No	___	___
Case97	9911849	Congenital myotonia	Solo	whole exome sequencing	Yes	Positive	Male	35 Y	Adulthood	Childhood	Onset at the age of 1-year old with difficulty running and muscle cramp; Myotonia more pronounced in the extremities; Flat feet; Hand tremor; Handgrip myotonia; Upper & lower muscle weakness, proximal > upper; Muscle stiffness; Splenomegaly; Low platelet count; EMG-NCV is suggestive of myotonic disorder; Muscle biopsy: compatible with myotonic dystrophy; Positive Hx of Hypothyroidism and Abnormal…	Myotonic syndrome	CLCN1	Frameshift	Known	Chr7:143018498TC>T	Potential Compound Heterozygote	NM_000083.3	c.475delC	p.Leu159Cysfs*11	Myotonia congenita, dominant [#MIM:160800]/AD;Myotonia congenita, recessive [#MIM:255700]/ AR;Myotonia levior, recessive	Autosomal Recessive	Likely Pathogenic	PVS1 PM2	Not checked	Positive	PMID: 29480456	2021-04-20	No	___	___
														Splicing	Known	Chr7:143013488A>T	Potential Compound Heterozygote	NM_000083.3	c.180+3A>T	___			Likely Pathogenic	PM2 PP5			PMID: 9040760, 22094069, 18337730, 24349310, 24515601, 23810313		No	___	___
Case98	9913140	CMS	Solo	whole exome sequencing	No	Negative	Male	33 Y	Adulthood	Childhood	Onset age: 6-year old; Alternative fatigue; Limb weakness, lower>upper; Difficulty running & climbing steps; Positive Repetitive nerve stimulation; Anti-AChR antibody: negative; Slightly elevated CPK; MuSk: 0.01.	Neuromuscular junction disorders	DOK7	Frameshift	Known	Chr4:3494833A>AGCCT	Potential Compound Heterozygote	NM_173660.5	c.1124_1127dupTGCC	p.Ala378Serfs*30	Fetal akinesia deformation sequence 3 [#MIM:618389] AR; Myasthenic syndrome, congenital, 10 [#MIM:254300] AR	Autosomal Recessive	Likely Pathogenic	PS3,PM2,PP3,PP5	Not checked	Positive	PMID: 16917026, 20458068, 20012313, 22661499, 17452375, 18626973, 23790237, 23219351	2021-08-05	No	___	SCV001755389
														Frameshift	Novel	Chr4:3491468AC>A	Potential Compound Heterozygote	NM_173660.5	c.718delC	p.Gln240Serfs*6			Likely Pathogenic	PVS1,PM2			___		No	___	___
Case99	9913362	NMD	Solo	whole exome sequencing	Yes	Negative	Female	2 M	Childhood	Childhood	Elevated level of CPK, LDH, and SGPT; Small ASD; Mild to moderate TR; Hypotonia; Congenital hypothyroidism; One seizure attack; Respiratory arrest at the age of 2-day; Ultrasound revealed coarse echotexture in liver.	Myopathies	ACADVL	Splicing	Novel	Chr17:7127050G>A	Compound Heterozygote	NM_000018.4	c.1269+1G>A	___	VLCAD deficiency; #MIM 201475, AR	Autosomal Recessive	Pathogenic	PM2, PVS1, PP5	Inherited	Positive	___	2021-08-30	No	___	___
														Missense	Novel	Chr17:7124932G>A	Compound Heterozygote	NM_000018.4	c.553G>A	p.Gly185Ser			Pathogenic	PM2, PM1, PP3, PS3, PP5, PM5			___		No	___	___
Case100	9913630	CMT	Solo	whole exome sequencing	No	Positive	Male	31 Y	Adulthood	Adulthood	Onset age: 24-year old; Pes cavus; Distal muscle weakness due to neuropathy, low & upper limbs; Abnormal gait; Mild thenar muscle atrophy; Hand tremor; Laminectomy & internal fixation at L4-L5 vertebrae noted in Lumbar Spine MRI; EMG-NCV: subacute to chronic sensorimotor (mainly motor) polyneuropathy.	Overlapping	SYNE1	Missense	Novel	Chr6:152740712G>A	Potential Compound Heterozygote	NM_033071.4	c.5434C>T	p.Arg1812Trp	Arthrogryposis multiplex congenita 3, myogenic type[#MIM:618484 ]/AR, Emery-Dreifuss muscular dystrophy 4, autosomal dominant[#MIM:612998]/AD, Spinocerebellar ataxia, autosomal recessive 8[#MIM:610743]/AR	Autosomal Recessive	VUS	PM2	Not checked	VUS	___	2021-05-23	No	___	___
														Missense	Novel	Chr6:152652811G>C	Potential Compound Heterozygote	NM_033071.4	c.12796C>G	p.Gln4266Glu			VUS	PM2, PP3			___		No	___	___
Case101	9915299	Muscle Weakness & Hearing Impairment	Solo	whole exome sequencing	Yes	Positive	Male	29 Y	Adulthood	Not reported	Ataxia; Dizziness; Tremor; Bilateral progressive hearing loss, post lingual; Muscle weakness; EMG-NCV suggestive of sensory motor polyneuropathy with moderate axonal damage.	Motor Neuron Disease	ASAH1	Missense	N	Chr8:17919844C>T	Potential Compound Heterozygote	NM_177924.5	c.592G>A	p.Val198Ile	Farber lipogranulomatosis [#MIM:228000]/ AR; Spinal muscular atrophy with progressive myoclonic epilepsy [#MIM:159950]/ AR	Autosomal Recessive	VUS	PVS1 PM2	Not checked	Positive	___	2021-06-19	No	___	___
														Frameshift	N	Chr8:17917148CCA>CG	Potential Compound Heterozygote	NM_177924.5	c.848_849delinsC	p.Leu283Profs*11			Likely Pathogenic	PVS1 PM2			___		No	___	___
Case102	144	Hereditary ataxia	Solo	whole exome sequencing	No	Negative	Male	64 Y	Adulthood	Adulthood	Ataxia; Lower limbs neuropathy extended to upper limbs; Distal Upper & lower limbs neuropathy & muscle weakness; Mild pes cavus; Dysarthria; Brain MRI: T2 hyperintense signal change in dentate nuclei; Mild SNHL in Rt. ear revealed in audiogram; Mild diastolic dysfunction in Echocardiogram.	Hereditary Paraplegia	RTN2	Missense	Novel	Chr19:45991934C>T	Heterozygote	NM_005619.5	c.1411G>A	p.Val471Met	Spastic paraplegia 12, autosomal dominant; MIM# 604805, AD	Autosoaml Dominant	VUS	PP3	Not checked	VUS	___	2021-07-19	No	___	___
Case103	400	Hereditary Neuropathy	Solo	whole exome sequencing	Yes	Negative	Male	47 Y	Adulthood	Adulthood	Onset at the age of 38-year old with numbness in toes; Muscle pain due to neuropathy; Delayed ulcer healing in Rt. toe; Distal sensory loss (pain, temperature & touch); Bilateral pes cavus; Mild tremor in hands; EMG-NCV: suggestive of sensory polyneuropathy.	Negative	___	___	___	___	___	___	___	___	___	Sporadic	___	___	___	Negative	___	2024-06-22	No	___	___
Case104	859	CMS	Solo	whole exome sequencing	Yes	Negative	Female	29 Y	Adulthood	Childhood	Onset at the age of 4-year old with bilateral ptosis and unilateral strabismus; Mild facial weakness; Proximal muscle weakness, lower>upper; Respiratory problem; Tonic-clonic seizures; EMG-NCV compatible with NMJ disorders.	Neuromuscular junction disorders	RAPSN	Missense	Known	Chr11:47469631G>T	Homozygote	NM_005055.5	c.264C>A	p.Asn88Lys	Fetal akinesia deformation sequence 2 [#MIM:618388]/ AR; Myasthenic syndrome, congenital, 11, associated with acetylcholine receptor deficiency [#MIM:616326]/ AR	Autosomal Recessive	Likely Pathogenic	PM1 PM2 PP5	Not checked	Positive	PMID: 12796535, 16945936, 14504330	2021-09-08	No	___	___
Case105	1410	Myopathy	Solo	whole exome sequencing	Yes	Negative	Male	43 Y	Adulthood	Adulthood	Asymmetric proximal & distal muscle weakness from 6-year ago; Diabetes mellitus; Muscle pain; Neck muscle weakness; Difficulty running, walking & raising arms; Limb muscle atrophy; Elevated SGOT, SGPT & CPK; Echocardiography: mild diastolic LV dysfunction; EMG-NCV: chronic myopathy with some irritations; Polycythemia, suspicious of ; Muscle biopsy: vacuolar myopathy with necrosis/regeneration, li…	Myopathies	PNPLA2	Missense	Novel	Chr11:822463T>C	Homozygote	NM_020376.4	c.553T>C	p.Ser185Pro	Neutral lipid storage disease with myopathy [#MIM: 610717]/AR	Autosomal Recessive	VUS	PP3/PM2	Not checked	VUS	___	2022-08-21	No	___	___
Case106	2198	Myopathy	Solo	whole exome sequencing	No	Negative	Male	36 Y	Adulthood	Adulthood	Hx of bulbar weakness; Generalized muscle weakness; Lower >Upper muscle weakness; Mild lordosis; Abnormal gait; EMG-NCV suggestive of myopathy; Thighs & Legs MRI suggestive of either myopathy/myositis or chronic muscle denervation; Elevated level of CPK, LDH, SGOT & SGPT.	Negative	___	___	___	___	___	___	___	___	___	Sporadic	___	___	___	Negative	___	2021-07-27	No	___	___
Case107	2366	CMS	Solo	whole exome sequencing	Yes	Negative	Female	34 Y	Adulthood	Adulthood	Ptosis, bilateral; Strabismus; Ophthalmoplegia; Apneic episodes precipitated by illness, fatigue and stress; Respiratory distress; Mild bulbar muscle weakness; Generalized muscle weakness; EMG-NCV is suggestive of NMJ.	Neuromuscular junction disorders	CHRNE	Frameshift	Novel	Chr17:4802280CTGGCTCCTGTCCCACCTCGCCGG>C	Homozygote	NM_000080.4	c.1319_1326+15del	(p.?)	Myasthenic syndrome, congenital, 4A, slow-channel [MIM#605809] AD,AR; Myasthenic syndrome, congenital, 4B, fast-channel [MIM#616324]AR; Myasthenic syndrome, congenital, 4C, associated with acetylcholine receptor deficiency [MIM#608931]AR	Autosomal Recessive	Likely Pathogenic	PVS1,PM2	Not checked	Positive	___	2021-07-08	No	___	___
Case108	2436	CMT	Solo	whole exome sequencing	Yes	Negative	Male	43 Y	Adulthood	Childhood	Onset at the age of 12-year old with difficulty walking; Muscle weakness, upper limb; Palpitations during heavy work; Blurred vision, occasionally; Mildly abnormal semen analysis; EMG-NCV: bilateral severe chronic sensorimotor axonal polyneuropathy (CMT).	Neuropathies	PDK3	Missense	Known	ChrX:24521596G>A	Hemizygote	NM_005391.5	c.473G>A	p.Arg158His	?Charcot-Marie-Tooth disease, X-linked dominant, 6 [#MIM:300905]	X-linked	Likely Pathogenic	PS3, PM2, PP3, PP4	Not checked	Positive	PMID: 23297365, 26801680	2021-09-19	No	___	___
Case109	2609	LGMD	Solo	whole exome sequencing	Yes	Positive	Male	17 Y	Childhood	Childhood	Onset at the age of 15-year old with muscle weakness and difficulty climbing steps; Proximal muscle weakness, lower>upper limbs; Elevated level of CPK; MRI of Rt. femur: fatty degeneration in favor of myopathy.	Dystrophies	CAPN3	Splicing	Novel	Chr15:42703943A>G	Homozygote	NM_000070.3	c.2440-2A>G	___	Muscular dystrophy, limb-girdle, autosomal dominant, 4, AD [MIM# 618129]; Muscular dystrophy, limb-girdle, autosomal recessive, 1, AR [MIM# 253600]	Autosomal Recessive	VUS	PM2, PVS1 (Moderate), PP5?	Inherited	VUS	___	2021-02-08	No	___	___
Case110	2620	Congenital myopathy	Solo	whole exome sequencing	Yes	Positive	Female	28 Y	Adulthood	Childhood	Onset at the age of 5-6 years old with difficulty rising from seated position and climbing steps; Proximal muscle weakness, lower>upper limbs; EMG: suggestive of polymyopathy.	Negative	___	___	___	___	___	___	___	___	___	Familial	___	___	___	Negative	___	2021-08-22	No	___	___
Case111	2777	SMA	Solo	whole exome sequencing	No	Negative	Male	33 Y	Adulthood	Adulthood	Onset at the age of 20-yer old with difficulty walking following proteinuria & renal problem; Difficulty climbing steps & running; Muscle weakness, lower>upper limbs, distal>proximal; EMG-NCV: chronic neurogenic changes in upper & lower limit, chronic neuropathy/neuronopathy.	Negative	___	___	___	___	___	___	___	___	___	Sporadic	___	___	___	Negative	___	2022-05-05	Quantitative analysis by Multiplex Ligation Dependent Probe Amplification (MLPA) for exons VII and VIII in SMN1 genes was previously performed in this laboratory for this individual, and revealed two copies of exons 7&8 in SMN1 gene.	___	___
Case112	3151	Motor neuron disease	Solo	whole exome sequencing	Yes	Negative	Male	25 Y	Adulthood	Childhood	Onset at the age of 12-year old; Difficulty running & walking; Distal muscle weakness & atrophy due to peripheral neuropathy; Hand tremor; Muscle cramp; Lower limb neuropathy extended to upper limb at the age of 22-year old; Hx of seizures with Mildly abnormal EEG; EMG-NCV: chronic motor neuropathy	Negative	___	___	___	___	___	___	___	___	___	Sporadic	___	___	___	Negative	___	2021-11-10	No	___	___
Case113	3549	Muscular dystrophy	Solo	whole exome sequencing	No	Positive	Male	26 Y	Adulthood	Adulthood	Onset at the age of 22-year old; Generalized muscle weakness & atrophy; Difficulty walking, running & climbing steps; Waddling gait; Lordosis; Muscle wasting; Limitation of joint mobility; Mild joint contracture; Decreased muscle force.	Dystrophies	LMNA	Missense	Novel	Chr1:156084894G>C	Heterozygote	NM_170707.4	c.185G>C	p.Arg62Pro	Emery-Dreifuss muscular dystrophy 2, autosomal dominant [#MIM:181350]/ AD; Emery-Dreifuss muscular dystrophy 3, autosomal recessive [#MIM:616516]/ AR; Muscular dystrophy, congenital [#MIM:613205]/ AD	Autosoaml Dominant	Likely Pathogenic	PM1 PM2 PP3 PP5	Not checked	Positive	___	2021-03-10	No	___	___
Case114	3702	SMA	Solo	whole exome sequencing	Yes	Negative	Male	13 Y	Childhood	Childhood	Onset at the age of 12-year old with difficulty walking; Areflexia, distal lower limbs; Motor neuropathy; Muscle weakness; Pes cavus; EMG-NCV: Chronic motor neuropathy; Distal SMA.	Overlapping	SETX	Missense	Novel	Chr9:135221699G>A	Heterozygote	NM_015046.7	c.337C>T	p.Pro113Ser	Amyotrophic lateral sclerosis 4, juvenile [MIM#602433] AD; Spinocerebellar ataxia, autosomal recessive, with axonal neuropathy 2 {MIM#606002] AR	Autosoaml Dominant	VUS	PM2,PP3	De novo	VUS	___	2021-10-27	No	___	SCV001755407
Case115	3840	Metabolic myopathy	Solo	whole exome sequencing	Yes	Negative	Female	10 Y	Childhood	Childhood	Progressive proximal weakness, lower limbs, & Foot drop; Hyperlordosis; Abnormality of gait, unstable; Elevated level of CPK; Muscle biopsy: muscular dystrophy; IHC compatible with gamma sarcoglycanopathy; EMG-NCV: chronic myopathic pattern, muscular dystrophy should be considered.	Dystrophies	SGCG	Frameshift	Known	Chr13:23869568CT>C	Homozygote	NM_000231.3	c.525delT	p.Phe175Leufs*20	Muscular dystrophy, limb-girdle, autosomal recessive 5, AR [MIM# 253700]	Autosomal Recessive	Pathogenic	PM2, PVS1, PP5	Not checked	Positive	___	2021-09-19	No	___	___
Case116	3917	ALS	Solo	whole exome sequencing	No	Negative	Male	37 Y	Adulthood	Childhood	Onset at the age of 5-year old with muscle cramp & weakness in lower limb extended to upper; Generalized muscle weakness & atrophy; Mild bulbar palsies; Progressive motor function loss; Decreased DTR; EMG-NCV: chronic Motor Neuron Disease.	Negative	___	___	___	___	___	___	___	___	___	Sporadic	___	___	___	Negative	___	2021-10-21	No	___	___
Case117	3969	Myopathy	Solo	whole exome sequencing	No	Negative	Female	53 Y	Adulthood	Not reported	Mild muscle weakness; Myalgia upon exercise, lower>upper limbs; Muscle cramps & pain; Mild proximal weakness; EMG: mild non-irritable myopathic process; Elevated CPK, SGOT & SGPT; Muscle biopsy: compatible with lipid storage myopathy; Thighs and leg MRIs: suggestive of either early subacute muscle denervation or mild myositis.	Overlapping	CACNA1S	Missense	Novel	Chr1:201079333G>T	Heterozygote	NM_000069.3	c.217C>A	p.Pro73Thr	Hypokalemic periodic paralysis, type 1; #MIM 170400, AD; {Malignant hyperthermia susceptibility 5}; #MIM 601887, AD; {Thyrotoxic periodic paralysis, susceptibility to, 1}; #MIM 188580, AD	Autosoaml Dominant	VUS	PM2, PP3	Not checked	VUS	___	2021-09-18	No	___	___
Case118	3971	Hereditary paraplagia & Hearing Impairment	Solo	whole exome sequencing	Yes	Positive	Male	32 Y	Adulthood	Childhood	Onset at the age of 6-7 year old with difficulty running; Hearing impairment, bilateral since childhood; Difficulty climbing steps; Spasticity; Spastic gait; EMG-NCV: suggestive of ant. horn cell disease mostly involving lower limb.	Hereditary Paraplegia	SPG7	Frameshift	Novel	Chr16:89598422_89598449del28	Homozygote	NM_003119.4	c.1098_1125del	p.Val368Serfs*62	Spastic paraplegia 7, autosomal recessive; #MIM 607259, AD, AR	Autosomal Recessive	Likely Pathogenic	PM2, PVS1	Not checked	Positive	___	44460	No	___	___
Case119	4096	Motor neuron disease	Solo	whole exome sequencing	No	Negative	Male	34 Y	Adulthood	Adulthood	Onset at the age of 23-year old with hand tremor; Progressive proximal muscle weakness, upper & lower limbs; Palm muscle wasting; Wheelchair bound since last year; Slight increase in the level of CPK; EMG-NCV: possible suggestion for anterior horn cell disease.	Negative	___	___	___	___	___	___	___	___	___	Sporadic	___	___	___	Negative	___	2024-02-14	No	___	___
Case120	4274	Myopathy	Solo	whole exome sequencing	No	Negative	Male	6 Y	Childhood	Childhood	Onset at the age of 4-year old with foot drop and difficulty climbing steps; Myopathy in proximal lower limb; Impaired gait; EMG-NCV: chronic myopathic process.	Negative	___	___	___	___	___	___	___	___	___	Sporadic	___	___	___	Negative	___	2021-10-18	No	___	___
Case121	4286	CMT	Solo	whole exome sequencing	No	Positive	Male	67 Y	Adulthood	Adulthood	Onset at the age of 65-year old with foot drop and neuropathy; Lower limbs muscle weakness due to neuropathy; Gait abnormality; Pes cavus.	Negative	___	___	___	___	___	___	___	___	___	Familial	___	___	___	Negative	___	2021-11-11	No	___	___
Case122	4642	Myopathy	Solo	whole exome sequencing	No	Negative	Male	4 Y	Childhood	Childhood	Tachycardia; Excessive sweating; Dilated cardiomyopathy	Myopathies	TPM1	Missense	Novel	Chr15:63351863A>C	Heterozygote	NM_001018005.2	c.476A>C	p.Asp159Ala	Cardiomyopathy, dilated, 1Y; #MIM 611878, AD; Cardiomyopathy, hypertrophic, 3; #MIM 115196, AD; Left ventricular noncompaction 9; #MIM 611878, AD	Autosoaml Dominant	Likely Pathogenic	PM2, PM1, PP2, PP3, PP4	De novo	Positive	___	2021-10-18	No	___	___
Case123	4851	Myopathy	Solo	whole exome sequencing	No	Negative	Male	23 Y	Adulthood	Childhood	Onset at the age of 9-year old with dorsiflexor weakness, Pseudohypertrophy of the calves and Difficulty running; Proximal muscle weakness, lower limbs; Lordosis; Abnormal gait; Muscle biopsy: rimmed vacuole myopathy compatible with hereditary inclusion body myopathy; EMG-NCV: chronic myopathic process; Elevated CPK & LDH.	Myopathies	GNE	Missense	Known	Chr9:36217396A>G	Homozygote	NM_001128227.3	c.2228T>C	p.Met743Thr	Nonaka myopathy [#MIM605820] AR	Autosomal Recessive	Pathogenic	PS3 PM2 PP2 PP3 PP5(strong)	Not checked	Positive	___	2021-10-27	No	___	___
Case124	4942	CMS	Solo	whole exome sequencing	No	Negative	Female	24 Y	Adulthood	Childhood	Onset at the age of 10-year old with difficulty walking & lower limb muscle weakness; Waddling gait; Generalized muscle weakness; Lordosis; Diplopia; Decreased force; Hx of bilateral ptosis; Hx of facial weakness; Thymic hyperplasia; EMG-NCV: suggestive of severe NMJ disorder; Positive acetylcholine receptor (AChR) antibodies.	Negative	___	___	___	___	___	___	___	___	___	Sporadic	___	___	___	Negative	___	2024-07-29	No	___	___
Case125	5071	CMT	Solo	whole exome sequencing	No	Negative	Female	6 Y	Childhood	Childhood	Motor milestone delay; Delayed walking; Generalized muscle weakness; Facial weakness; Epicanthic folds; Retrognathia; Thenar atrophy; Abnormality of gait, steppage; Foot drop; Flat feet; Decreased DTR; Decreased muscle force; EMG-NCV suggestive of motor sensory polyneuropathy, CMT.	Neuropathies	MTMR2	Frameshift	Novel	Chr11:95568600T>TTGTTGTGAATA	Homozygote	NM_016156.6	c.1776_1786dup	p.Arg596Ilefs*20	Charcot-Marie-Tooth disease, type 4B1 [#MIM:601382]/ AR	Autosomal Recessive	VUS	PM2 PVS1 moderate	Inherited	VUS	___	2021-11-14	No	___	___
Case126	5141	Hereditary paraplagia	Solo	whole exome sequencing	Yes	Negative	Female	19 Y	Adulthood	Childhood	Abnormal gait since 5-year old; Spastic gait; Ataxia; Myopia; Pyramidal sign; Mild pes cavus; Lower limb spasticity & weakness; Increased DTR; Brain MRI: suggestive of cortical and white matter atrophy.	Hereditary Ataxia	RUBCN	Missense	Novel	Chr3:197403895A>G	Homozygote	NM_014687.4	c.2507T>C	p.Phe836Ser	Spinocerebellar ataxia, autosomal recessive 15 [#MIM:615705] AR	Autosomal Recessive	VUS	___	Not checked	VUS	___	44529	No	___	___
Case127	5271	Motor neuron disease	Solo	whole exome sequencing	No	Negative	Male	29 Y	Adulthood	Childhood	Onset at the age of 9-year old with neuropathy of lower limbs, distal; Muscle cramps; Muscle atrophy; Muscle weakness due to neuropathy; Hand tremor; Pes cavus; Abnormality of gait; Foot nerve biopsy suggestive of muscular dystrophy; EMG-NCV: chronic motor neuron disease.	Negative	___	___	___	___	___	___	___	___	___	Sporadic	___	___	___	Negative	___	2021-12-19	No	___	___
Case128	5453	LGMD	Solo	whole exome sequencing	Yes	Positive	Male	16 Y	Childhood	Childhood	Onset at the age of 12-year old with proximal weakness of limbs; Mild lordosis; Abnormal gait; Difficulty walking; Increased CPK, Aldolase, ALT & AST; EMG: myogenic process; Muscle biopsy: muscular dystrophy; IHC suggestive of Calpainopathy	Dystrophies	CAPN3	Stop gain	Known	Chr15:42700502A>T	Homozygote	NM_000070.3	c.1894A>T	p.Lys632*	Muscular dystrophy, limb-girdle, autosomal dominant 4 [#MIM:618129], AD; Muscular dystrophy, limb-girdle, autosomal recessive 1 [#MIM:253600], AR	Autosomal Recessive	Pathogenic	PVS1, PM2, PM3-supporting	Inherited	Positive	PMID: 30056071	2021-12-25	No	___	___
Case129	5509	Hereditary paraplagia	Solo	whole exome sequencing	No	Negative	Male	28 Y	Adulthood	Adulthood	Onset at the age of 21-year old; Muscle weakness, lower>upper limbs; Urinary incontinence; Ataxia; Spasticity; Spastic gait.	Motor Neuron Disease	TARDBP	Missense	Novel	Chr1:11082629C>T	Heterozygote	NM_007375.4	c.1163C>T	p.Ala388Val	Amyotrophic lateral sclerosis 10, with or without FTD; #MIM612069, AD Frontotemporal lobar degeneration, TARDBP-related; #MIM612069, AD	Autosoaml Dominant	VUS	PM2, PM1, PP2	Not segregated	VUS	___	2021-12-20	No	___	___
Case130	5881	SMA	Solo	whole exome sequencing	Yes	Negative	Female	13 Y	Childhood	Childhood	Onset age: 8-year old with proximal muscle weakness, lower>upper limbs; Abnormal gait; Feet drop, mild; EMG-NCV: active & chronic generalized disorder of the motor neurons, consistent with anterior horn cell disease.	Overlapping	LMNA	Missense	Novel	Chr1:156106226A>G	Heterozygote	NM_170707.4	c.1379A>G	p.Glu460Gly	Cardiomyopathy, dilated, 1A [#MIM:115200]/ AD; Charcot-Marie-Tooth disease, type 2B1 [#MIM:605588]/ AR; Emery-Dreifuss muscular dystrophy 2, autosomal dominant [#MIM:181350]/ AD; Emery-Dreifuss muscular dystrophy 3, autosomal recessive [#MIM:616516]/ AR; Heart-hand syndrome, Slovenian type [#MIM:610140]/ AD; Hutchinson-Gilford progeria [#MIM:176670]/ AD; Lipodystrophy, familial partial, type 2 [#…	Autosoaml Dominant	VUS	PM1 PM2 PP3	Not checked	VUS	___	2022-05-25	Quantitative analysis by Multiplex Ligation Dependent Probe Amplification (MLPA) for exons VII and VIII in SMN1 & SMN2 genes was previously performed in this laboratory for this individual, and revealed two copies of exons 7&8 in SMN1 gene.	___	___
Case131	5903	LGMD	Solo	whole exome sequencing	Yes	Negative	Male	16 Y	Childhood	Childhood	Onset at the age of 7-year old with limbs muscle weakness, upper & lower; Limb-girdle muscle weakness; Decreased DTR; wheelchair bound; Scoliosis; Elevated level of CPK.	Overlapping	FHL1	Missense	Known	ChrX:135289320G>T	Hemizygote	NM_001449.5	c.302G>T	p.Cys101Phe	?Uruguay faciocardiomusculoskeletal syndrome [#MIM:300280 XLR]; Emery-Dreifuss muscular dystrophy 6, X-linked [#MIM:300696] XLR; Myopathy, X-linked, with postural muscle atrophy [#MIM:300696] XLR; Reducing body myopathy, X-linked 1a, severe, infantile or early childhood onset [#MIM:300717] XLD; Reducing body myopathy, X-linked 1b, with late childhood or adult onset [#MIM:300718] XL; Scapuloperone…	X-linked	Likely Pathogenic	PM1,PM2,PM5,PP3	Not checked	Unclear	PMID: 19171836	2022-02-17	Multiplex Ligation Dependent Probe Amplification (MLPA) screening for deletions and duplications in Dystrophin gene was previously performed in this laboratory for this individual which revealed no Del/Dup in this patient.	___	___
Case132	6117	SMA	Solo	whole exome sequencing	Yes	Negative	Female	13 Y	Childhood	Childhood	Onset at the age of 11-year old with lower limbs muscle weakness, distal and abnormality of gait; Distal motor neuropathy; Pes cavus; Increased level of CPK; EMG-NCV: hereditary motor neuron disease suggestive of distal SMA.	Neuropathies	SCO2	Missense	Novel	Chr22:50962480C>G	Homozygote	NM_005138.3	c.361G>C	p.Gly121Arg	Mitochondrial complex IV deficiency, nuclear type 2 [#MIM:604377]/ AR; Myopia 6 [#MIM:608908]/ AD	Autosomal Recessive	VUS	PM1 PM2 PP3	Inherited	VUS	___	2021-05-12	No	___	___
Case133	6161	Hereditary Neuropathy	Solo	whole exome sequencing	No	Positive	Male	41 Y	Adulthood	Adulthood	Lower limbs muscle weakness & mild atrophy due to neuropathy since 4-year ago; Mild pes cavus; EMG-NCV suggestive of chronic axonal type sensorimotor polyneuropathy.	Neuropathies	MFN2	Missense	Known	Chr1:12071580G>T	Heterozygote	NM_014874.4	c.2232G>T	p.Glu744Asp	Charcot-Marie-Tooth disease, axonal, type 2A2A [#MIM:609260]/ AD; Charcot-Marie-Tooth disease, axonal, type 2A2B [#MIM:617087]/ AR; Hereditary motor and sensory neuropathy VIA [#MIM:601152]/ AD	Autosoaml Dominant	Likely Pathogenic	PM1 PM2 PM5 PP3	Inherited	Positive	PMID: 22206013, 31211173, 24863639	2021-08-14	No	___	___
Case134	6640	CMS	Solo	whole exome sequencing	Yes	Negative	Female	10 Y	Childhood	Childhood	Onset at the age of 7-year old; Easy fatigability; Muscle weakness, upper & lower limbs; Frequent falls; Pain in legs; EMG-NCV: Decreased response, suggestive of end-plate acetylcholinesterase (AChE) deficiency or slow-channel syndrome; Hx of seizures.	Neuromuscular junction disorders	COLQ	Missense	Known	Chr3:15498015G>C	Homozygote	NM_005677.4	c.1026C>G	p.Asp342Glu	Myasthenic syndrome, congenital, 5 [#MM:603034] AR	Autosomal Recessive	Likely Pathogenic	PS3_Supporting, PM2, PM3?(according to Clingen's criteria), PP3, PP4?	Not checked	Positive	___	2021-04-12	No	___	___
Case135	6807	Muscular dystrophy	Solo	whole exome sequencing	No	Negative	Male	53 Y	Adulthood	Not reported	Muscle weakness & atrophy; High CPK; EMG-NCV: irritable myopathy.	Overlapping	TTN	Missense	Novel	Chr2:179463947C>T	Heterozygote	NM_001267550.2	c.56573G>A	p.Arg18858Gln	Cardiomyopathy, dilated, 1G; #MIM604145 Cardiomyopathy, familial hypertrophic, 9; #MIM613765, AD Muscular dystrophy, limb-girdle, autosomal recessive 10; #MIM608807, AR Myopathy, myofibrillar, 9, with early respiratory failure; #MIM603689, AD Salih myopathy; #MIM611705, AR Tibial muscular dystrophy, tardive; #MIM600334, AD	Autosoaml Dominant	VUS	PM2	Inherited	VUS	___	2022-07-30	Multiplex Ligation Dependent Probe Amplification (MLPA) (P034 & P035 MRC Holland) screening for deletions and duplication in the 79 exons of Dystrophin gene.	___	___
Case136	7262	Congenital Myotonia	Solo	whole exome sequencing	Yes	Negative	Male	14 Y	Childhood	Childhood	Onset: 4-year ago; Difficulty climbing steps; Cold triggered symptoms; Neuropathy of hands & foot; EMG-NCV compatible of myotonic process.	Overlapping	CLCN1	Missense	Novel	Chr7:143029920C>T	Homozygote	NM_000083.3	c.1355C>T	p.Pro452Leu	Myotonia congenita, dominant [#MIM:160800] AD; Myotonia congenita, recessive [#MIM:255700] AR; Myotonia levior, recessive	Autosomal Recessive	VUS	PM2, PP2?, PP3	Not checked	VUS	___	2022-01-27	No	___	___
Case137	7361	Hereditary Neuropathy	Solo	whole exome sequencing	No	Negative	Male	8 Y	Childhood	Childhood	Onset at the age of 7-year old with lower muscle pain & weakness & pneumonia suggestive of Guillain-Barre; Facial weakness; Myopathic facies; Neck muscle weakness; Generalized muscle weakness & atrophy; Low weight; Hypotonia; Speech problem, dysarthria; EMG-NCV: chronic severe axonal type mainly motor neuronopathy/ neuropathy.	Negative	___	___	___	___	___	___	___	___	___	Sporadic	___	___	___	Negative	___	2021-04-11	No	___	___
Case138	7606	CMT	Solo	whole exome sequencing	No	Negative	Male	36 Y	Adulthood	Adulthood	Onset since 7-8 years ago; Mild distal muscle atrophy due to neuropathy; Paresthesia in hands & left foot; Mild lower muscle weakness; Sensorimotor polyneuropathy, demyelinating type, R/O MADSAM in EMG.	Neuropathies	INF2	Missense	Novel	Chr14:105172469G>A	Heterozygote	NM_022489.4	c.799G>A	p.Asp267Asn	Charcot-Marie-Tooth disease, dominant intermediate E; #MIM614455, AD Glomerulosclerosis, focal segmental, 5; #MIM613237	Autosoaml Dominant	VUS	PP2, PM2	De novo	VUS	___	2021-01-23	Multiplex Ligation Dependent Probe Amplification (MLPA) (P033 MRC Holland) was performed in order to screen duplication or deletion of a 1.5 Mb region on chromosome 17p11.2 causing Charcot-Marie-Tooth disease type 1A (CMT1A) and Hereditary Neuropathy with liability to Pressure Palsies (HNPP), respectively	___	___
Case139	8102	NMD	Solo	whole exome sequencing	Yes	Negative	Female	32 Y	Adulthood	Adulthood	Onset at the age of 18-year old with abnormality of gait; Difficulty climbing steps; Mild myopathic and calf muscle weakness; Muscle biopsy: muscular dystrophy; IHC: suggestive of Dysferlinopathy.	Dystrophies	DYSF	Stop gain	Known	Chr2:71730438C>T	Homozygote	NM_003494.4	c.331C>T	p.Gln111*	Miyoshi muscular dystrophy 1 [#MIM:254130]/ AR; Muscular dystrophy, limb-girdle, autosomal recessive 2 [#MIM:253601]/ AR; Myopathy, distal, with anterior tibial onset [#MIM:606768]/ AR	Autosomal Recessive	Pathogenic	PVS1 PM2 PP5	Not checked	Positive	PMID: 21522182&PMID:33613410	2022-11-01	No	___	SCV001755393
Case140	8595	Motor neuron disease	Solo	whole exome sequencing	No	Negative	Male	69 Y	Adulthood	Adulthood	Onset: 3-month ago; Chronic bronchitis; Upper limb neuropathy; Muscle weakness, upper limbs due to neuropathy, left>right; Mild muscle cramps & fasciculations; EMG-NCV: suggestive of MND.	Negative	___	___	___	___	___	___	___	___	___	Sporadic	___	___	___	Negative	___	2022-12-02	No	___	___
Case141	8641	Mitochondrial myopathy	Solo	whole exome sequencing	No	Positive	Male	45 Y	Adulthood	Childhood	Onset at the age of 7-year old; Difficulty walking & running; Lower muscle weakness & pain (distal); Abnormality of gait; Waddling gait; Lordosis; EMG-NCV: myopathic pattern; MRI of left leg: fatty atrophy in gastrocnemius muscle, unilateral; Elevated CPK, LDH & Aldolase.	Myopathies	ETFDH	Missense	Known	Chr4:159624588T>C	Homozygote	NM_004453.4	c.1130T>C	p.Leu377Pro	Glutaric acidemia IIC; #MIM231680, AR	Autosomal Recessive	Likely Pathogenic	PM2, PP3, PP5, PS1	Not checked	Positive	PMID: 31331668, 17412732, 29339009, 29376578	2021-11-28	No	___	SCV001755408
Case142	8874	Myopathy	Solo	whole exome sequencing	Yes	Negative	Female	43 Y	Adulthood	Adulthood	Onset age:39-year old; Proximal & distal muscle weakness, proximal>distal, lower>upper limb; Difficulty walking, running & climbing steps; Prominent calves; Mild lordosis; Hand tremor; Mild abnormal gait; Elevated CPK & LDH; Muscle biopsy: compatible with neurogenic atrophy with few necrosis/regeneration, prominent internalization of nuclei and many moth-eaten fibers; EMG-NCV: myopathic process.	Overlapping	RYR1	Missense	Known	Chr19:38998423T>C	Homozygote	NM_000540.3	c.8888T>C	p.Leu2963Pro	Central core disease [#MIM:117000]/ AD, AR; King-Denborough syndrome [#MIM:619542]/ AD; Minicore myopathy with external ophthalmoplegia [#MIM:255320]/ AR; Neuromuscular disease, congenital, with uniform type 1 fiber [#MIM:117000]/ AD, AR; {Malignant hyperthermia susceptibility 1} [#MIM:145600]/ AD	Autosomal Recessive	Pathogenic	PS3_Supporting, PM2, PM3_VeryStrong, PP2,PP3	Not checked	Positive	PMID: 23826317, 24951453, 27234031	2022-01-30	No	___	SCV001755390
Case143	8891	LGMD	Solo	whole exome sequencing	Yes	Negative	Male	20 Y	Adulthood	Childhood	Onset at the age of 16-year old with difficulty walking and lower limbs weakness; Numbness in feet; Proximal muscle weakness, legs>arms; Mild wasting in distal of legs; Flat feet; Ankles deformity; Abnormal gait; Difficulty walking, running & climbing steps; Loss of tip-toe walking; Increased muscle fatiguability; Elevated level of CPK, LDH & LFT; Muscle biopsy compatible with muscular dystrophy;…	Dystrophies	DYSF	Missense	Novel	Chr2:71748002CT>C	Homozygote	NM_003494.4	c.1024delT	p.Cys342Valfs*33	Miyoshi muscular dystrophy 1 [#MIM:254130] AR; Muscular dystrophy, limb-girdle, autosomal recessive 2 [#MIM:253601] AR; Myopathy, distal, with anterior tibial onset [#MIM:606768] AR	Autosomal Recessive	Likely Pathogenic	PVS1,PM2	Not checked	Positive	___	2022-02-17	No	___	___
Case144	9163	Myopathy	Solo	whole exome sequencing	Yes	Negative	Male	13 Y	Childhood	Childhood	Consanguineous parents, age of onset 2 years, positive Gower`s sign, lower muscle weakness, calf pseudo hypertrophy, walking delay and elevated CPK	Dystrophies	SGCG	Frameshift	Known	Chr13:23869569CT>C	Homozygote	NM_000231.3	c.525delT	p.Phe175Leufs*20	Muscular dystrophy, limb-girdle, autosomal recessive 5 [MIM#253700]/AR	Autosomal Recessive	Pathogenic	PVS1_Very strong/PP5_Very strong/PM2_Moderate	Not checked	Positive	PMID: 32214227, 24552312, 23929688, 22240777, 20623375, 18285821, 12566530, 12040521, 10942431, 8923014, 7481775, 1303286	2023-12-12	Multiplex Ligation Dependent Probe Amplification (MLPA) screening for deletions and duplications in Dystrophin gene was previously performed in this laboratory for this individual which revealed no Del/Dup in this patient.	___	___
Case145	9217	Muscular dystrophy	Solo	whole exome sequencing	Yes	Negative	Male	37 Y	Adulthood	Childhood	Onset since 6-year ago with lower muscle weakness; Abnormal gait, waddling gait; Lordosis; Decreased muscle force & DTR; Mild TR & MR; Elevated CPK, LDH, SGOT & SGPT; EMG: myopathic process; IHC suggestive of Dysferlinopathies; Muscle biopsy: muscular dystrophy with lobulated fibers.	Dystrophies	DYSF	Stop gain	Novel	Chr2:71788931C>T	Homozygote	NM_001130987.2	c.2266C>T	p.Gln756*	Miyoshi muscular dystrophy 1 [MIM#254130] AR; Muscular dystrophy, limb-girdle, autosomal recessive 2 [MIM#253601] AR; Myopathy, distal, with anterior tibial onset [MIM#606768] AR	Autosomal Recessive	Likely Pathogenic	PVS1,PM2	Not checked	Positive	___	2022-02-17	No	___	___
Case146	9219	Muscular dystrophy	Solo	whole exome sequencing	No	Negative	Male	32 Y	Adulthood	Adulthood	Onset at the age of 29-year with pain and distal lower limbs neuronopathy; Mild pes cavus; Elevated level of CPK & Aldolase; Normal EMG-NCV.	Negative	___	___	___	___	___	___	___	___	___	Sporadic	___	___	___	Negative	___	2022-01-20	No	___	___
Case147	9223	Muscular dystrophy	Solo	whole exome sequencing	Yes	Negative	Male	7 Y	Childhood	Childhood	Onset at the age of 4-year; Lower muscle weakness, proximal>distal; Difficulty walking, running & climbing steps; Feet drop; Waddling gait; Calf muscle pseudohypertrophy; Elevated level of CPK & LDH, SGOT & SGPT; EMG: myopathic process	Dystrophies	DMD	Stop gain	Known	ChrX:32519899G>A	Hemizygote	NM_004006.3	c.2353C>T	p.Gln785*	Becker muscular dystrophy [#MIM:300376] XLR; Cardiomyopathy, dilated, 3B [#MIM:302045] XL; Duchenne muscular dystrophy [#MIM:310200] XLR	X-linked	Pathogenic	PVS1,PM2,PP5	Not checked	Positive	PMID: 17253928	2022-02-16	Multiplex Ligation Dependent Probe Amplification (MLPA) screening for deletions and duplications in Dystrophin gene was previously performed in this laboratory for this individual which revealed no Del/Dup in this patient.	___	___
Case148	9317	Myopathy	Solo	whole exome sequencing	Yes	Negative	Male	24 Y	Adulthood	Adulthood	Onset at the age of 20-year old with lower muscle weakness; Pseudohypertrophy of the calves; Elevated CPK.	Dystrophies	TTN	Stop gain	Novel	Chr2:179393062G>T	Homozygote	NM_001267550.2	c.107316C>A	p.Tyr35772*	Muscular dystrophy, limb-girdle, autosomal recessive 10 [MIM#608807], Myopathy, myofibrillar, 9, with early respiratory failure (MFM9) [MIM#603689], Salih myopathy [MIM#611705], Tibial muscular dystrophy, tardive [MIM#600334]	Autosomal Recessive	Likely Pathogenic	PVS1, PM2	Not checked	Positive	___	2022-03-27	Multiplex Ligation Dependent Probe Amplification (MLPA) screening for deletions and duplications in Dystrophin gene was previously performed in this laboratory for this individual which revealed no Del/Dup in this patient.	___	___
Case149	9391	Hereditary Neuropathy	Solo	whole exome sequencing	Yes	Negative	Male	8 Y	Childhood	Childhood	Onset at birth; Severe hypotonia; Psychomotor delay; Inability to walk; Long face; Small nose; Proximal & distal muscle weakness; Severe laxity in fingers & wrists; Mild PS; Internal rotation of shoulder; Small hands; Mild small feet; EMG-NCV: suggestive of chronic myopathic process or presence of concomitant myopathy and ant horn cell disorder; Increased LDH & Aldolase.	Dystrophies	COL6A1	Frameshift	Novel	Chr21:47406564AAA>A	Homozygote	NM_001848.3	c.554_555delAA	p.Lys185Serfs*32	Bethlem myopathy 1 [#MIM:158810] AD, AR; Ullrich congenital muscular dystrophy 1 [#MIM:254090] AD, AR	Autosomal Recessive	Pathogenic	PVS1, PM2, PP5	Not checked	Positive	___	2022-02-14	No	___	___
Case150	9409	Hereditary Neuropathy	Solo	whole exome sequencing	Yes	Negative	Female	35 Y	Adulthood	Adulthood	Onset: 29-year old with Hypoesthesia in hand & foot fingers; Distal & proximal muscle weakness & stiffness, distal>proximal, upper>lower; Mild distal legs muscle wasting; Hand tremor; Claw fingers; Mild pes cavus; Abnormal gait; Ataxia; Muscle spasm/ cramps; Poor fine motor coordination; EMG-NCV: compatible with chronic axonal sensorimotor polyneuropathy/ neuronopathy.	Neuropathies	MFN2	Missense	Novel	Chr1:12069755T>C	Homozygote	NM_014874.4	c.2176T>C	p.Ser726Pro	Charcot-Marie-Tooth disease, axonal, type 2A2A [#MIM:609260] AD; Charcot-Marie-Tooth disease, axonal, type 2A2B [#MIM:617087] AR; Hereditary motor and sensory neuropathy VIA [#MIM:601152] AD	Autosomal Recessive	VUS	PM1,PM2,PP3?	Not segregated	VUS	___	2022-05-02	No	___	___
Case151	9738	Hereditary paraplagia	Solo	whole exome sequencing	Yes	Positive	Female	15 Y	Childhood	Childhood	Onset at the age of 15-year old with Ataxia & Dysarthria; Difficulty walking; Quadriplegia (Quadriparesis); Loss of ambulation at the age of 16-year old; Decreased muscle mass; Spasticity; Seizures; Dysphagia; Lower limbs stiffness; Mental regression & progressive dementia; Progressive neuropathy; Pes cavus, bilateral; Claw toes; Thoracolumbar spine MRI: mild thoracic cord atrophic changes; EMG-N…	Overlapping	C19orf12	Missense	Novel	Chr19:30193635A>T	Homozygote	NM_001031726.3	c.443T>A	p.Ile148Asn	?Spastic paraplegia 43, autosomal recessive [#MIM:615043]/ AR; Neurodegeneration with brain iron accumulation 4 [#MIM:614298]/ AD, AR	Autosomal Recessive	VUS	PM2 PP3	Not checked	VUS	___	2022-08-01	No	___	___
Case152	9839	NMD	Solo	whole exome sequencing	No	Negative	Male	7 Y	Childhood	Childhood	Muscle weakness & pain; Easy fatigability, legs; FTT; EMG-NCV: chronic myopathic process, suggestive of muscular dystrophy; Elevated level of CPK.	Dystrophies	COL6A3	Missense	Novel	Chr2:238249514G>A	Heterozygote	NM_004369.4	c.8045C>T	p.Pro2682Leu	Bethlem myopathy 1; #MIM158810, AD,AR Dystonia 27; #MIM616411, AR Ullrich congenital muscular dystrophy 1; #MIM254090, AD,AR	Autosoaml Dominant	VUS	PM2, PP3	Not checked	VUS	___	2022-01-17	No	___	___
Case153	9876	CMS	Solo	whole exome sequencing	Yes	Negative	Female	36 Y	Adulthood	Adulthood	Bilateral ptosis since the age of 24-year; Proximal muscle weakness, upper>lower; Hx. of Hypokalemia; Fatigue; First EMG-NCV was suggestive of Myasthenia Gravis & the Second one was compatible with mild myopathic process; Negative AChR antibodies & MuSK.	Overlapping	CRYAB	Missense	Novel	Chr11:111782277G>C	Heterozygote	NM_001885.3	c.172C>G	p.Pro58Ala	Cardiomyopathy, dilated, 1II; #MIM615184, AD Cataract 16, multiple types; #MIM613763, AD,AR Myopathy, myofibrillar, 2; #MIM608810, AD Myopathy, myofibrillar, fatal infantile hypertonic, alpha-B crystallin-related; #MIM613869, AR	Autosoaml Dominant	VUS	PM2, PP3	Not checked	VUS	___	2022-01-17	No	___	___
Case154	9988	Hereditary Neuropathy	Solo	whole exome sequencing	No	Negative	Male	36 Y	Adulthood	Adulthood	Onset since 8-month ago with muscle weakness, proximal, progressive; Wheelchair bound since 2-month ago; Dysphagia since 2-month ago; Speech problem (Dysphonia); Hand tremor & paresis; Swallowing difficulty; Myopia; Generalized muscle weakness & atrophy; Muscle pain; Elevated level of CPK; EMG-NCV: mild sensory polyneuropathy; Muscle biopsy: suggestive of lipid storage myopathy.	Myopathies	ETFDH	Frameshift	Novel	Chr4:159601753T>TG	Heterozygote	NM_004453.4	c.172dup	p.Glu58Glyfs*38	Glutaric acidemia IIC [#MIM:231680]/ AR	Autosomal Recessive	Likely Pathogenic	PVS1 PM2	Not checked	Unclear	___	2022-01-27	No	___	___
Case155	10191	Motor neuron disease	Solo	whole exome sequencing	No	Negative	Male	32 Y	Adulthood	Adulthood	Onset at the age of 25-year old with lower muscle weakness & spastic gait; Lower limb weakness & spasticity; Cervical spine MRI: probable hemangioma at T2 vertebral body and mild spondyloarthrosis; EMG-NCV: involvement of upper motor neuron should be considered.	Negative	___	___	___	___	___	___	___	___	___	Sporadic	___	___	___	Negative	___	2022-10-02	No	___	___
Case156	10210	Muscle hypertonia & Developemental delay and	Solo	whole exome sequencing	No	Negative	Male	8 Y	Childhood	Childhood	8 years old, neurodevelopmental delay, hemiparesis, increased muscle tone , EDX report? Normal EEG and history of therapeutic abortion in mother (microcephaly and heart abnormality in the fetus).	Overlapping	BSCL2	Stop gain	Novel	chr11:62472897G>A	Heterozygote	NM_001122955.4	c.280C>T	(p.Gln94*)	Encephalopathy, progressive, with or without lipodystrophy [#MIM:615924]/ AR; Lipodystrophy, congenital generalized, type 2 [#MIM:269700]/ AR; Neuronopathy, distal hereditary motor, autosomal dominant 13 [#MIM:619112]/ AD; Silver spastic paraplegia syndrome [#MIM:270685]/ AD	Autosoaml Dominant	Likely Pathogenic	[PVS1 PM2]	Not checked	Unclear	___	2024-07-18	___	___	___
Case157	10372	CMT	Solo	whole exome sequencing	Yes	Negative	Female	14 Y	Childhood	Childhood	Onset at the age of 11-year old with gait abnormality, foot drop & lower muscle neuropathy; Pes cavus; Steppage gait; Lower & upper muscle weakness due to neuropathy; Hand tremor; EMG-NCV: uniform demyelinating sensorimotor polyneuropathy with secondary axonal loss suggestive of HSMN1,4.	Neuropathies	NDRG1	Stop gain	Known	Chr8:134274379G>T	Homozygote	NM_006096.4	c.237C>A	p.Tyr79*	Charcot-Marie-Tooth disease, type 4D [#MIM:601455]/ AR	Autosomal Recessive	Likely Pathogenic	PVS1 PM2	Not checked	Positive	PMID: 34476298	2022-05-17	Multiplex Ligation Dependent Probe Amplification (MLPA) screening for deletions and duplications in CMT/HNPP region was previously performed in this laboratory for this individual and revealed no Del/Dup in PMP22 gene of this individual.	___	___
Case158	10767	LGMD	Solo	whole exome sequencing	Yes	Positive	Male	32 Y	Adulthood	Childhood	Onset since 15-year ago with abnormal gait; Difficulty climbing steps and running; Increased fatigue; Proximal & distal weakness in lower limbs; EMG-NCV: mild myopathic process; Elevated CPK; Muscle biopsy suggestive of muscular dystrophy with many lobulated fibers.	Overlapping	TRIM32	Missense	Novel	Chr9:119460509T>C	Homozygote	NM_012210.4	c.488T>C	p.Leu163Pro	?Bardet-Biedl syndrome 11; #MIM615988, ARMuscular dystrophy, limb-girdle, autosomal recessive 8; #MIM254110, AR	Autosomal Recessive	VUS	PM2, PP3	Not segregated	VUS	___	2022-01-22	No	___	___
Case159	10816	Muscular dystrophy	Solo	whole exome sequencing	Yes	Negative	Male	26 Y	Adulthood	Childhood	Onset since 15-year ago with elevated CPK; Distal muscle weakness, lower; Muscle pain; Muscle atrophy; Difficulty climbing steps; Lordosis; Positive Gowers sign; Abnormal gait; Elevated LDH, SGOT & SGPT; IHC suggestive of Dysferlinopathies; Muscle biopsy: muscular dystrophy.	Dystrophies	DYSF	Stop gain	Novel	Chr2:71730438C>T	Homozygote	NM_003494.4	c.331C>T	p.Gln111Ter	Miyoshi muscular dystrophy 1; #MIM254130, ARMuscular dystrophy, limb-girdle, autosomal recessive 2; #MIM253601, AR Myopathy, distal, with anterior tibial onset; #MIM606768, AR	Autosomal Recessive	Pathogenic	PM2, PVS1, PP5	Not checked	Positive	___	2022-01-29	No	___	SCV001755393
Case160	10881	Mitochondrial disease	Solo	whole exome sequencing	Yes	Positive	Female	42 Y	Adulthood	Adulthood	Bilateral ptosis since last year; Muscle weakness; Neuropathy, foot & hand; Sensorineural hearing impairment, mild to moderate, bilateral; Episodic abdominal pain & distension; Cachexia (Adipose tissue loss); Elevated level of CPK.	Overlapping	TRPV4	Large CNV deletion	Novel	Chr12:110230165-110230236	___	NM_021625.5	Exon 12	___	?Avascular necrosis of femoral head, primary, 2; #MIM617383, AD; Brachyolmia type 3; #MIM113500, AD; Digital arthropathy-brachydactyly, familial; #MIM606835, AD; Hereditary motor and sensory neuropathy, type Iic; #MIM606071, AD; Metatropic dysplasia; #MIM156530, AD Neuronopathy, distal hereditary motor, type VIII; #MIM600175, AD; Parastremmatic dwarfism; #MIM 168400, AD; Scapuloperoneal spinal mu…	___	Likely Pathogenic	CNV	Not checked	VUS	___	2022-08-02	No	No	___
Case161	11053	Muscular dystrophy	Solo	whole exome sequencing	No	Negative	Male	3 Y	Childhood	Childhood	Hydronephrosis at birth; Delayed walking; Proximal muscle weakness in legs; Lordosis; Prominent calves; Flat feet; Positive Gowers sign; Abnormal gait; Difficulty walking, running & climbing steps; Flat feet; Elevated SGOT, SGPT, LDH & CPK; EMG-NCV: myopathic disorder.	Dystrophies	DMD	Stop gain	Known	ChrX:32398633C>T	Hemizygote	NM_004006.3	c.4839G>A	p.Trp1613*	Becker muscular dystrophy [#MIM:300376]/ XLR; Cardiomyopathy, dilated, 3B [#MIM:302045]/ XL; Duchenne muscular dystrophy [#MIM:310200]/ XLR	X-linked	Pathogenic	PVS1 PM2	Not checked	Positive	PMID: 23536893 & PMID: 31081998	2022-03-14	No	___	___
Case162	11492	Hereditary Neuropathy	Solo	whole exome sequencing	No	Negative	Male	37 Y	Adulthood	Adulthood	Onset at the age of 27-year old with lower limbs neuropathy; Distal upper & lower limbs weakness due to neuropathy; Leg pain & cramps; Difficulty climbing steps; Mild pes cavus; EMG-NCV: Chronic axonal type sensorimotor polyneuropathy.	Negative	___	___	___	___	___	___	___	___	___	Sporadic	___	___	___	Negative	___	2022-03-13	No	___	___
Case163	11579	Mitochondrial myopathy	Solo	whole exome sequencing	No	Negative	Male	14 Y	Childhood	Childhood	Onset at the age of 10-year old with bilateral ptosis and proximal muscle weakness; Mild hypotonia; Ophthalmoplegia; High level of blood pyruvate; Muscle biopsy suggestive of mitochondrial myopathy; EMG-NCV: compatible with non-irritable myopathy.	Myopathies	TPM3	Large CNV duplication	Novel	Chr1:154142873-154142947	___	NM_152263.4	Exon 8	___	CAP myopathy 1; #MIM609284, AD,AR,Myopathy, congenital, with fiber-type disproportion; #MIM255310, AD,AR Nemaline myopathy 1, autosomal dominant or recessive; #MIM609284, AD,AR	___	VUS	___	Not checked	VUS	___	2022-06-02	No	No	___
Case164	11589	CMT	Solo	whole exome sequencing	No	Positive	Female	58 Y	Adulthood	Adulthood	Distal lower limbs neuropathy & mild muscle weakness; Numbness since 10-year ago; Muscle cramps; Lower limb muscle pain.	Neuropathies	ITPR3	Missense	Known	Chr6:33643532C>T	Heterozygote	NM_002224.4	c.3181C>T	p.His1061Tyr	{Diabetes, type 1, susceptibility to} [#MIM:222100] AR	Autosomal Recessive	VUS	PM2, PP3	Not checked	VUS	PMID: 24627108; 27549087; 32949214	2022-02-24	No	___	___
Case165	11837	Hereditary Neuropathy	Solo	whole exome sequencing	Yes	Negative	Male	54 Y	Adulthood	Adulthood	Onset age: 52-year old; Lower limbs weakness, rapidly progressive; Fasciculations, all limbs, lower>upper; Stiffening of muscles; Shortness of breath; Atrophy of hand muscles; EMG: chronic anterior horn cell disease with upper motor involvement suggestive of distal SMA or HSP, HMN & familial ALS; Wheelchair bound.	Motor Neuron Disease	HSPB1	Missense	Known	Chr7:75933161G>T	Heterozygote	NM_001540.5	c.407G>T	p.Arg136Leu	Charcot-Marie-Tooth disease, axonal, type 2F [MIM#606595] AD; Neuronopathy, distal hereditary motor, type IIB [MIM#608634] AD	Autosoaml Dominant	Likely Pathogenic	PS4_Moderate, PM1, PM2, PM5, PP3, PP2(?)	Not checked	Positive	PMID: 22176143; 25547330; 26989944	2022-02-21	No	___	___
Case166	11925	CMS	Solo	whole exome sequencing	No	Negative	Female	38 Y	Adulthood	Adulthood	Onset at the age of 18-year old with lower muscle weakness; Generalized muscle weakness due to the defect at the neuromuscular junction, proximal>distal; Lordosis; Hand tremor; Waddling gait; Mild respiratory insufficiency due to muscle weakness; Weakness aggravated by exertion; Positive Hx of SLE since 12-year ago; Bone densitometry: osteoporotic at the levels of L1-L4 spine & femur neck; Muscle…	Neuromuscular junction disorders	CHRNA1	Missense	Known	Chr2:175618970C>T	Heterozygote	NM_000079.4	c.517G>A	p.Gly173Ser	Multiple pterygium syndrome, lethal type [#MIM:253290]/ AR; Myasthenic syndrome, congenital, 1A, slow-channel [#MIM:601462]/ AD; Myasthenic syndrome, congenital, 1B, fast-channel [#MIM:608930]/ AD, AR	Autosoaml Dominant	Likely Pathogenic	PM1 PM2 PP3 PP5	Inherited	Positive	PMID: 7619526, 9158151, 29054425	2022-03-02	No	___	___
Case167	11987	Myopathy	Solo	whole exome sequencing	Yes	Positive	Male	35 Y	Adulthood	Adulthood	Onset at the age of 31-year old; Lower muscle weakness, proximal & distal; Mild atrophy of lower limbs muscles; Thenar & hypothenar atrophy; Lordosis; Pes cavus; Elevated level of CPK; Muscle biopsy: rimmed vacuole myopathy compatible with hereditary inclusion body myopathy.	Myopathies	GNE	Missense	Known	Chr9:36217396A>G	Homozygote	NM_005476.7	c.2135T>C	p.Met712Thr	Nonaka myopathy, AR (#MIM: 605820), Sialuria, AD (#MIM: 269921)	Autosomal Recessive	Pathogenic	___	Not checked	Positive	PMID: 12743242,PMID: 12473753,PMID: 12743242,PMID: 25966635	2022-02-28	No	___	___
Case168	12052	Muscular dystrophy	Solo	whole exome sequencing	No	Positive	Male	21 Y	Adulthood	Adulthood	Onset since 19-year old with feet weakness extended to hands; Proximal > distal muscle weakness; Mild muscle wasting lower>upper limbs; Bilateral Foot drop & Pes cavus; Mild abnormal gait; Difficulty walking, running & climbing steps; Elevated SGOT, SGPT, CPK & LDH; Muscle biopsy: myopathic disorder with moderate muscular atrophy; EMG: myopathic process.	Dystrophies	DYSF	Stop gain	Known	Chr2:71730438C>T	Homozygote	NM_003494.4	c.331C>T	p.Gln111*	Miyoshi muscular dystrophy 1 [#MIM:254130] AR; Muscular dystrophy, limb-girdle, autosomal recessive 2 [#MIM:253601] AR; Myopathy, distal, with anterior tibial onset [#MIM:606768] AR	Autosomal Recessive	Pathogenic	PVS1,PM2,PP5	Not checked	Positive	PMID:21522182, 18853459,26671124, 33613410	2022-02-27	No	___	SCV001755393
Case169	12100	SMA	Solo	whole exome sequencing	No	Negative	Female	43 Y	Adulthood	Adulthood	Neuropathy, progressive lower limb paresthesia started 12 years ago and later started in the palmar hands, distal symmetric polyneuropathy reported in NCV and one normal report of EDX	Negative	___	___	___	___	___	___	___	___	___	Sporadic	___	___	___	Negative	___	2024-01-20	___	___	___
Case170	12133	Myopathy	Solo	whole exome sequencing	Yes	Negative	Female	61 Y	Adulthood	Not reported	Bilateral glaucoma; Lower muscle weakness, distal>proximal; Mild muscle atrophy; Increased CPK; Muscle biopsy: selective type 2 fibers atrophy with some degenerative/ regenerative fibers and fiber type grouping associated with moth-eaten fibers suggestive of neurogenic atrophy.	Overlapping	ANO5	Frameshift	Novel	Chr11:22283821_22283824delTTTA	Homozygote	NM_213599.3	c.1777_1780delTTTA	p.Phe593Metfs*15	Gnathodiaphyseal dysplasia; #MIM166260, ADMiyoshi muscular dystrophy 3; #MIM613319, ARMuscular dystrophy, limb-girdle, autosomal recessive 12; #MIM611307, AR	Autosomal Recessive	Likely Pathogenic	PM2, PVS1	Not checked	Positive	___	2022-03-02	No	___	___
Case171	12217	NMD	Solo	whole exome sequencing	Yes	Positive	Female	34 Y	Adulthood	Adulthood	Onset age: 30-year old with muscle weakness and hypoesthesia, unilateral; Progressive dementia; Progressive gait disturbance; Parkinsonism; Quadriparesis; Wheelchair bound; Minimyoclonus; Dysarthria; Spasticity; EEG: Intermittent periodic slowing; Brain MRI: two UBOs at the posterior horn of lateral ventricle, also few tiny nonspecific bright signal intensity foci in periventricular subcortical w…	Myopathies	PSEN1	Missense	Known	Chr14:73637671T>C	Heterozygote	NM_000021.4	c.254T>C	p.Leu85Pro	?Acne inversa, familial, 3 [#MIM:613737]/ AD; Alzheimer disease, type 3 [#MIM:607822]/ AD; Alzheimer disease, type 3, with spastic paraparesis and apraxia [#MIM:607822]/ AD; Alzheimer disease, type 3, with spastic paraparesis and unusual plaques [#MIM:607822]/ AD; Cardiomyopathy, dilated, 1U [#MIM:613694]/ AD; Dementia, frontotemporal [#MIM:600274]/ AD; Pick disease [#MIM:172700]/ AD	Autosoaml Dominant	Pathogenic	PM1 PM2 PP3 PP5]+PS3??	Not checked	Positive	PMID: 15534188 &PMID: 31282415	2022-08-05	No	___	___
Case172	12418	CMS	Solo	whole exome sequencing	Yes	Negative	Female	31 Y	Adulthood	Childhood	Bilateral cataract; Glaucoma; Strabismus; Mild ptosis; Muscle weakness, proximal, upper & lower limbs since 12-13 years old; Difficulty running & climbing steps; Increased CPK; EMG: myopathic process with very mild active denervation; Muscle biopsy: dystrophic process	Overlapping	GMPPB	Missense	Novel	Chr3:49759916C>A	Homozygote	NM_021971.4	c.589G>T	p.Val197Phe	Muscular dystrophy-dystroglycanopathy (congenital with brain and eye anomalies), type A, 14, AR [#MIM:615350]; Muscular dystrophy-dystroglycanopathy (congenital with mental retardation), type B, 14, AR [#MIM:615351]; Muscular dystrophy-dystroglycanopathy (limb-girdle), type C, 14, AR [#MIM:615352]	Autosomal Recessive	VUS	PM2	Not checked	VUS	___	2022-05-04	No	___	___
Case173	12618	Hereditary paraplagia	Solo	whole exome sequencing	Yes	Positive	Male	12 Y	Childhood	Childhood	Onset at the age of 5-year old with gait abnormality & lower muscle weakness; Flat feet; Spastic gait.	Hereditary Paraplegia	PCYT2	Missense	Novel	Chr17:79864350T>C	Homozygote	NM_002861.5	c.749A>G	p.His250Arg	Spastic paraplegia 82, autosomal recessive [#MIM:618770]/ AR	Autosomal Recessive	VUS	PM2 PP3	Inherited	VUS	___	2022-12-03	No	___	___
Case174	12686	ALS	Solo	whole exome sequencing	Yes	Positive	Female	47 Y	Adulthood	Adulthood	Onset at the age of 41-year with lower muscle weakness, lumbar pain & cramp due to neuropathy; Fasciculations; Hand tremor; Generalized muscle weakness, lower & upper limbs; Difficulty walking and rising from seated position; EDX: compatible with motor neuron disease.	Motor Neuron Disease	SOD1	Missense	Known	Chr21:33040860T>C	Heterozygote	NM_000454.5	c.434T>C	p.Leu145Ser	Amyotrophic lateral sclerosis 1 [#MIM:105400], AD, AR; Spastic tetraplegia; axial hypotonia, progressive [#MIM:618598], AR	Autosoaml Dominant	Pathogenic	PM1,PM2,PM5,PP3,PP5	Not checked	Positive	PMID: 7496169, 9029070, 23062701, 27978769, 32777948, 33036560	2022-04-04	No	___	SCV001755373
Case175	12687	CMT	Solo	whole exome sequencing	No	Negative	Male	20 Y	Adulthood	Childhood	Mild lordosis; Mild steppage gait; Pes cavus; Distal lower limb muscle weakness due to neuropathy; No ability to heel & tip-toe walking; EMG-NCV: Chronic demyelinating sensorimotor polyneuropathy	Neuropathies	GJB1	Missense	Known	ChrX:70444113G>A	Hemizygote	NM_000166.6	c.556G>A	p.Glu186Lys	Charcot-Marie-Tooth neuropathy, X-linked dominant, 1 [#MIM:302800]/ XLD	X-linked	Pathogenic	PM1 PM2 PP3 PP5	Not checked	Positive	PMID: 8266101, 11571214, 12542510, 22243284, 27844031	2022-05-22	Multiplex Ligation Dependent Probe Amplification (MLPA) screening for deletions and duplications in CMT/HNPP region was previously performed in this laboratory for this individual and revealed no Del/Dup in PMP22 gene of this individual.	___	___
Case176	12695	LGMD	Solo	whole exome sequencing	Yes	Negative	Female	33 Y	Adulthood	Adulthood	Age at diagnosis: 23-year old; Hx. of delayed motor milestone; Proximal & distal muscle weakness; Decreased muscle force; Lumbar lordosis; Muscle wasting at shoulder girdle; Waddling gait; Achilles tendon contractures; Wheelchair bound; Hx of spinal tumor, cellular schwannoma & hypothyroidism; Lower limb MRI: fatty atrophy; Echocardiography: mild MVP, PI & TR, trivial MR, AR; Elevated CPK; EMG-NC…	Myopathies	KY	Missense	Novel	Chr3:134339623C>T	Homozygote	NM_178554.6	c.560G>A	p.Arg187His	Myopathy, myofibrillar, 7 [MIM#617114]/ AR	Autosomal Recessive	VUS	PM2,PP3	Inherited	VUS	___	2022-04-24	Multiplex Ligation Dependent Probe Amplification (MLPA) testing for Spinal Muscular Atrophy (SMA) was previously performed for this individual in Medical Genetics Laboratory of Dr. Zeinali and no del/dup was detected in SMN1 gene.	___	___
Case177	12759	CMT	Solo	whole exome sequencing	Yes	Negative	Female	15 Y	Childhood	Childhood	Onset: 11-year old; Laxity in fingers, wrists & elbows; Distal > proximal muscle weakness & wasting; Abnormal gait, imbalance; Difficulty walking, running & climbing steps; Hand tremor; Muscle cramps; Claw toes, mild; Bilateral pes cavus; Thenar & hypothenar atrophy; Axonal neuropathy; EMG-NCV: distal sensory, motor polyneuropathic process mainly axonal with active axonal degeneration.	Neuropathies	SORD	Missense	Known	Chr15:45357501C>A	Homozygote	NM_003104.6	c.458C>A	p.Ala153Asp	Sorbitol dehydrogenase deficiency with peripheral neuropathy [#MIM:618912] AR	Autosomal Recessive	Likely Pathogenic	PS3,PM2,PP3,PP5	Not checked	Positive	PMID:33875678, 32367058, 33397963	2022-03-03	No	___	___
Case178	13327	Myopathy	Solo	whole exome sequencing	Yes	Negative	Female	38 Y	Adulthood	Adulthood	Onset at the age of 38-year old with proximal muscle weakness; Cardiomyopathy; Motor developmental delay; Ptosis; EMG-NCV suggestive of Myopathy.	Myopathies	ACTA1	Missense	Known	Chr1:229567647T>C	Heterozygote	NM_001100.4	c.811A>G	p.Met271Val	Myopathy, actin, congenital, with cores [#MIM:161800] AD, AR; Myopathy, actin, congenital, with excess of thin myofilaments [#MIM:161800] AD, AR; Myopathy, congenital, with fiber-type disproportion 1 [#MIM:255310] AD, AR; Nemaline myopathy 3, autosomal dominant or recessive [#MIM:161800] AD, AR; ?Myopathy, scapulohumeroperoneal [#MIM:616852] AD	Autosoaml Dominant	Likely Pathogenic	PM1?, PM2, PM5, PP2, PP5?	De novo	Positive	PMID: 29731279	2022-05-19	No	___	___
Case179	13466	Hereditary Neuropathy	Solo	whole exome sequencing	No	Negative	Female	60 Y	Adulthood	Adulthood	Onset at the age of 55-year old with foot neuropathy extended to hand; Gait imbalance, walk with support; Inability to heel & toe walking; Paresthesia; Osteopenia; EMG-NCV: chronic axonal sensorimotor polyneuropathy.	Negative	___	___	___	___	___	___	___	___	___	Sporadic	___	___	___	Negative	___	2022-05-21	No	___	___
Case180	13637	Metabolic myopathy	Solo	whole exome sequencing	Yes	Negative	Male	23 Y	Adulthood	Childhood	Onset age: 7-year old with muscle cramps in lower limbs following exercise; Episodic weakness with myoglobinuria; Mild calf muscles pseudohypertrophy; Elevated CPK; Normal EMG-NCV; Muscle biopsy: no significant histochemical pathologic finding, no lipid or glycogen excess.	Myopathies	CPT2	Missense	Known	Chr1:53679182G>A	Homozygote	NM_000098.3	c.1892G>A	p.Arg631His	CPT II deficiency, myopathic, stress-induced [#MIM:255110] AD, AR; CPT II deficiency, infantile [#MIM:600649] AR; CPT II deficiency, lethal neonatal [#MIM:608836] AR; {Encephalopathy, acute, infection-induced, 4, susceptibility to} [#MIM:614212] AD, AR	Autosomal Recessive	VUS	PM2, PM5	Inherited	VUS	PMID:35256318	2022-04-20	No	___	___
Case181	13806	Kennedy disease	Solo	whole exome sequencing	No	Negative	Male	72 Y	Adulthood	Adulthood	Sporadic case, facial weakness, tremor, thenar and hypothenar atrophy, asymmetric muscle weakness, axonal poly sensorimotor atrophy and anterior horn disease reported in EMG/NCV	Negative	___	___	___	___	___	___	___	___	___	Sporadic	___	___	___	Negative	___	2024-02-04	Genetic testing for CAG trinucleotide repeat expansion in AR gene was previously performed in Diagenom Lab for this individual, and revealed normal allele size.	___	___
Case182	13813	LGMD	Solo	whole exome sequencing	Yes	Negative	Female	35 Y	Adulthood	Childhood	Onset at the age of 17-year old with scoliosis & dysarthria; Muscle weakness, lower & upper limbs following surgery at the age of 20-year; Generalized muscle weakness, lower>upper; Wheelchair bound since 31-year old; EMG-NCV: myopathic pattern; Elevated CPK; Muscle biopsy: myopathic atrophy of mainly type 1 fibers with few necrotic & degenerative/regenerative fibers associated with focal endomysi…	Myopathies	SELENON	Missense	Known	Chr1:26135586G>A	Homozygote	NM_020451.3	c.817G>A	p.Gly273Arg	Muscular dystrophy, rigid spine, 1 [#MIM:602771]/ AR; Myopathy, congenital, with fiber-type disproportion [#MIM:255310]/AD, AR	Autosomal Recessive	Likely Pathogenic	[PM2 PP3]+PM1 PM5?	Not checked	Positive	PMID: 15961312, PMID: 17951086 & PMID: 11528383	2022-08-18	No	___	___
Case183	13883	Myopathy	Solo	whole exome sequencing	Yes	Negative	Male	11 Y	Childhood	Childhood	Onset at the age of 9-year old with mild abnormal gait; Mild proximal weakness & difficulty climbing steps since 9-year old; Lower muscle weakness; EMG-NCV: myopathic pattern	Negative	___	___	___	___	___	___	___	___	___	Sporadic	___	___	___	Negative	___	2022-08-14	No	___	___
Case184	13976	Muscular dystrophy	Solo	whole exome sequencing	Yes	Positive	Female	35 Y	Adulthood	Adulthood	Onset: 28-year old; Proximal & distal muscle weakness, legs>arms; Frequent falls; Difficulty walking, running & climbing steps; Prominent calves, mild; Ankles deformity; Feet drop; Lordosis; Mild wasting in distal of legs; Hand tremor; Abnormal gait; Thenar & hypothenar atrophy; High level of CPK & Aldolase	Myopathies	GNE	Missense	Known	Chr9:36217396A>G	Homozygote	NM_005476.7	c.2135T>C	p.Met712Thr	Nonaka myopathy [#MIM:605820], AR;Sialuria; [#MIM:269921], AD	Autosomal Recessive	Pathogenic	PS3, PS4, PM2, PM3, PP3	Not checked	Positive	PMID: 15670773; PMID: 15670773; PMID: 21873062	2022-05-19	No	___	___
Case185	14097	SMA	Solo	whole exome sequencing	Yes	Negative	Male	15 Y	Childhood	Childhood	Onset age: 4-year old with Gait disturbance & Lower limb muscle weakness; Generalized muscle weakness; Generalized limb muscle atrophy; Wheelchair-bound; Hospitalized due to Respiratory insufficiency; EMG-NCV suggestive of chronic anterior horn cell disease, R/O SMA; Echocardiography: mild to moderate mitral valve abnormality & minimal PI.	Negative	___	___	___	___	___	___	___	___	___	Sporadic	___	___	___	Negative	___	2023-12-01	Quantitative analysis by Multiplex Ligation Dependent Probe Amplification (MLPA) for exons VII and VIII in SMN1 & SMN2 genes was previously performed in this laboratory for this individual, and revealed two copies of exons 7&8 in SMN1 gene.	___	___
Case186	14146	Congenital myopathy	Solo	whole exome sequencing	Yes	Positive	Female	28 Y	Adulthood	Childhood	Calf muscle pseudohypertrophy, bilateral; Hand tremor; Abnormal gait since 2-year old; Difficulty rising from seated position, walking, jumping and climbing steps; EMG-NCV: myotonic myopathic process; Positive Hx. of Systemic lupus erythematosus since 17-year old.	Overlapping	CLCN1	Missense	Known	Chr7:143017862A>G	Homozygote	NM_000083.3	c.407A>G	p.Asp136Gly	Myotonia congenita, dominant [#MIM:160800]/ AD; Myotonia congenita, recessive [#MIM:255700]/ AR; Myotonia levior, recessive	Autosomal Recessive	VUS	PM2 PP3 PP5	Inherited	VUS	PMID: 33263785& PMID: 7981681	2022-04-30	No	___	___
Case187	14296	LGMD	Solo	whole exome sequencing	Yes	Positive	Male	22 Y	Adulthood	Childhood	Onset at the age of 14-year old with elevated level of LFT; Feet weakness since 17-year old; Difficulty walking, running & climbing steps; Muscle weakness, legs>arms, distal>proximal; Muscle wasting in distal of legs; Lordosis; Ankle deformities; Abnormal gait; Elevated CPK & LDH; High level of SGOT & SGPT.	Dystrophies	DYSF	Stop gain	Novel	Chr2:71797809C>T	Homozygote	NM_003494.4	c.3112C>T	p.Arg1038*	Miyoshi muscular dystrophy 1 [#MIM:254130], AR; Muscular dystrophy, limb-girdle, autosomal recessive 2 [#MIM:253601], AR; Myopathy, distal, with anterior tibial onset [#MIM: 606768], AR	Autosomal Recessive	Pathogenic	PVS1-PP5-PM2	Not checked	Positive	___	2022-04-25	No	___	SCV001755662
Case188	14300	Metabolic myopathy	Solo	whole exome sequencing	Yes	Negative	Male	3 Y	Childhood	Childhood	Onset at the age of 1-month; Short stature; Growth retardation; Seizures; Depressed nasal bridge; Broad nasal tip; Midface hypoplasia, mild; Bow shaped lip; Deep set eyes; Mild cardiac hypertrophy & SDS; Hepatomegaly; Prominent abdomen; Hypoglycemia; Inguinal hernia, bilateral; Hx of vomiting & diarrhea; Elevated level of SGOT, SGPT, CPK, LDH & Aldolase; Abdomen & pelvis ultrasound suggestive of …	Myopathies	AGL	Large CNV deletion	Novel	NC_000001.10:g.(?_100327057)_(100327981_?)del	___	NM_000642.3	___	___	Glycogen storage disease IIIa, IIIb, [#MIM:232400]/ AR	___	Likely Pathogenic	CNV	Not checked	Positive	___	2022-01-06	No	No	___
Case189	14324	Myopathy	Solo	whole exome sequencing	Yes	Negative	Female	58 Y	Adulthood	Adulthood	Onset at the age of 51-year old; Proximal & distal muscle weakness, lower>upper; Muscle pain; Difficulty walking, running & climbing steps; Lower limb asymmetry; Scoliosis; Lordosis; Kyphosis; Elevated level of CPK; Lumbosacral MRI: osteopenia in bony structure & non-active schmorl’s nodes in the body of L3 & L4 spines, small hemangioma in the body of T12 spine; EMG-NCV: mild myopathic process; R…	Dystrophies	CAPN3	Missense	Known	Chr15:42702630A>G	Homozygote	NM_000070.3	c.2120A>G	p.Asp707Gly	Muscular dystrophy, limb-girdle, autosomal dominant 4 [#MIM:618129] AD; Muscular dystrophy, limb-girdle, autosomal recessive 1 [#MIM:253600] AR	Autosomal Recessive	Likely Pathogenic	PM1,PM2,PP3,PP5	Not checked	Positive	PMID: 10567047, 11525884, 25252031, 26632398	2022-04-26	No	___	___
Case190	14360	Myopathy	Solo	whole exome sequencing	No	Positive	Female	50 Y	Adulthood	Adulthood	Easy fatigability since 42-year old; Proximal muscle weakness since 45-year old; Muscle weakness, proximal>distal, lower>upper; Difficulty climbing steps & combing hair; Legs & thighs muscle MRI: fatty changes; Muscle biopsy: chronic dystrophic process; Slightly elevated CPK & Tg; EMG-NCV: inconclusive; Positive FHx of muscle weakness.	Overlapping	LMNA	Missense	Novel	Chr1:156104276C>T	Heterozygote	NM_170707.4	c.596C>T	p.Thr199Ile	Cardiomyopathy, dilated, 1A [#MIM:115200]/AD; Charcot-Marie-Tooth disease, type 2B1 [#MIM:605588]/AR; Emery-Dreifuss muscular dystrophy 2, autosomal dominant [#MIM:181350]/AD; Emery-Dreifuss muscular dystrophy 3, autosomal recessive [#MIM:616516]/AR; Heart-hand syndrome, Slovenian type [#MIM:610140]/AD; Hutchinson-Gilford progeria [#MIM:176670]/AD; Lipodystrophy, familial partial, type 2 [#MIM:15…	Autosoaml Dominant	VUS	PM1 PM2 PP3	Inherited	VUS	___	2022-05-16	No	___	___
Case191	14702	Hereditary Neuropathy	Solo	whole exome sequencing	Yes	Negative	Female	41 Y	Adulthood	Adulthood	Hand numbness/tingling since 3-year ago; Muscular atrophy, upper>lower; Thenar & hypothenar muscle atrophy, severe; Muscle pain, severe; Muscle weakness, distal>proximal, upper>lower; Claw fingers/toes; Bilateral pes cavus; EMG-NCV: chronic axonal sensorimotor polyneuropathy.	Negative	___	___	___	___	___	___	___	___	___	Sporadic	___	___	___	Negative	___	2022-12-06	Multiplex Ligation Dependent Probe Amplification (MLPA) screening for deletions and duplications in CMT/HNPP region was previously performed in this laboratory for this individual and revealed no Del/Dup in PMP22 gene of this individual.	___	___
Case192	14777	Muscular dystrophy	Solo	whole exome sequencing	Yes	Negative	Male	15 Y	Childhood	Childhood	Muscle weakness; Severe & progressive motor developmental delay; MLPA (Dystrophin): No deletion or duplication; High level of CPK, LDH & Aldolase	Dystrophies	SGCG	Large CNV deletion	Novel	Chr13:23824766-23824858	___	NM_000231.3	Exon 4	___	Muscular dystrophy, limb-girdle, autosomal recessive 5; #MIM253700, AR	___	Likely Pathogenic	CNV	Not checked	Positive	___	2022-10-05	No	No	___
Case193	14821	Congenital myopathy	Solo	whole exome sequencing	Yes	Negative	Male	11 Y	Childhood	Childhood	Onset from 2 years ago with lower muscle weakness; Difficulty rising from seated position and jumping; EMG-NCV suggestive of myopathy.	Negative	___	___	___	___	___	___	___	___	___	Sporadic	___	___	___	Negative	___	2022-05-22	No	___	___
Case194	14840	Hereditary paraplagia	Solo	whole exome sequencing	Yes	Negative	Male	30 Y	Adulthood	Childhood	Onset at the age of 12-year old; Seizures; Generalized tremor, hand, face; Progressive myoclonus epilepsy; Prominent & abnormal ears; Thin lips; Spasticity in lower limbs; Spastic gait; Muscle pain; Facial asymmetry; Hx of transient stuttering; Elevated level of CPK & LDH; EMG-NCV suggestive of diffuse motor neuron involvement with minimal active denervation; Moderate abnormal EEG.	Overlapping	DYNC1H1	Missense	Novel	Chr14:102478703G>A	Heterozygote	NM_001376.5	c.6910G>A	p.Asp2304Asn	Charcot-Marie-Tooth disease, axonal, type 2O [#MIM:614228] AD; Intellectual developmental disorder, autosomal dominant 13 [#MIM:614563] AD; Spinal muscular atrophy, lower extremity-predominant 1 [#MIM:158600] AD	Autosoaml Dominant	VUS	PM2, PP2, PP3	Inherited	VUS	___	2022-06-18	No	___	___
Case195	14997	SMA	Solo	whole exome sequencing	No	Positive	Female	30 Y	Adulthood	Childhood	Onset: 9-month; Hypotonia, mild; Difficulty rising from a sitting position; Frequent falls; Wheelchair bound from 5-year ago; EMG-NCV: anterior horn cell disease.	Motor Neuron Disease	SMN1	Stop gain	Known	Chr5:70247777C>T	Hemizygote	NM_000344.4	c.844C>T	p.Gln282*	Spinal muscular atrophy-1 [#MIM:253300]/AR; Spinal muscular atrophy-2 [#MIM:253550]/AR; Spinal muscular atrophy-3 [#MIM:253400]/AR; Spinal muscular atrophy-4 [#MIM:271150]/AR	Autosomal Recessive	Likely Pathogenic	PVS1-Strong, PM2, PP5	Not checked	Positive	PMID: 23352792; 35248528	2022-11-22	Multiplex Ligation Dependent Probe Amplification (MLPA) screening for deletions of SMN1 gene was previously performed in this laboratory for this individual which revealed one copy of exons 7/8 of SMN1 gene in this individual.	___	___
Case196	14998	motor neuron disease	Solo	whole exome sequencing	No	Negative	Female	13 Y	Childhood	Childhood	Age of onset 7 years, frequent falling, muscle weakness (distal more than proximal) ,lower more than upper extrimities involved , pes cavus ,compatible with chronic axonal motor neuropathy,dHMNand myopathy excluded (reported in EMG/NCV),negative for SMN screening (suspected to SMA typeIII).	Motor Neuron Disease	SIGMAR1	Missense	Novel	Chr9:34635780C>A	Homozygote	NM_005866.4	c.521G>T	p.Gly174Val	?Amyotrophic lateral sclerosis 16, juvenile [#MIM:614373]/ AR; ?Spinal muscular atrophy, distal, autosomal recessive, 2 [#MIM:605726]/ AR	Autosomal Recessive	VUS	PM2,PP3	Not checked	VUS	___	2023-05-30	Quantitative analysis by Multiplex Ligation Dependent Probe Amplification (MLPA) for exons VII and VIII in SMN1 & SMN2 genes was previously performed in this laboratory for this individual, and revealed two copies of exons 7&8 in SMN1 gene.	___	___
Case197	15219	CMT	Solo	whole exome sequencing	Yes	Negative	Male	17 Y	Childhood	Childhood	Onset at the age of 10-year old with difficulty running & frequent falls; Muscle weakness (distal) due to neuropathy, lower>upper; Difficulty rising from seated position; Muscle cramps; Areflexia; Gait abnormality; Pes cavus; EMG-NCV: Demyelinating type sensorimotor polyneuropathy.	Neuropathies	PLEKHG5	Splicing	Novel	Chr1:6534655C>T	Homozygote	NM_020631.6	c.303-8G>A	___	Charcot-Marie-Tooth disease, recessive intermediate C [MIM#615376] AR; Spinal muscular atrophy, distal, autosomal recessive, 4 [MIM#611067] AR	Autosomal Recessive	VUS	PM2,PP3	Inherited	VUS	___	2022-06-06	Multiplex Ligation Dependent Probe Amplification (MLPA) for PMP22 gene was previously performed at Tabriz Genetic Analysis Center for this individual and no deletions or duplications were identified.	___	___
Case198	15260	Hereditary Neuropathy	Solo	whole exome sequencing	Yes	Negative	Male	20 Y	Adulthood	Childhood	Onset from 10-year ago with lower limbs neuropathy & muscle weakness; Pes cavus; Muscle cramps & pain; Lower muscle weakness & atrophy due to neuropathy; Paresthesia, upper limbs; Neuropathic lesion; EMG-NCV: compatible with chronic axonal type sensorimotor polyneuropathy.	Myopathies	ISCU	Missense	Novel	Chr12:108961002G>A	Homozygote	NM_213595.4	c.376G>A	p.Ala126Thr	Myopathy with lactic acidosis, hereditary [#MIM:255125], AR	Autosomal Recessive	VUS	PM2, PP3	Not checked	VUS	___	2022-11-06	No	___	___
Case199	15316	Myopathy	Solo	whole exome sequencing	Yes	Positive	Male	40 Y	Adulthood	Childhood	Onset at the age of 6-7 years old; Difficulty running; Frequent falls; Progressive muscle weakness, lower>upper limbs; Hearing impairment; EMG-NCV suggestive of chronic non-irritable myopathy; Elevated CPK & LDH.	Negative	___	___	___	___	___	___	___	___	___	Familial	___	___	___	Negative	___	2022-06-18	Targeted next generation sequencing with emphasizing on metabolic myopathies genes was previously performed in this laboratory for this individual’s affected sister (Zahra Khorrami) which revealed no pathogenic/likely pathogenic clinically relevant variants in this NGS panel.	___	___
Case200	15447	Myopathy	Solo	whole exome sequencing	No	Negative	Female	7 Y	Childhood	Childhood	Onset from 6.5 years ago with gait abnormality & bilateral foot drop; Neck muscle weakness; Generalized muscle weakness, progressive, upper & lower, proximal & axial, right>left; Lordosis; Muscle cramps; Muscle biopsy suggestive of inflammatory myopathy and some chronic dystrophic process such as FSHD; EMG: generalize myogenic pattern, R/O Polymyositis.	Overlapping	FHL1	Inframe deletion	Novel	ChrX:135290053GGGA>G	Heterozygote	NM_001449.5	c.438_440del	p.Glu146del	?Uruguay faciocardiomusculoskeletal syndrome [#MIM:300280]/ XLR; Emery-Dreifuss muscular dystrophy 6, X-linked [#MIM:300696]/ XLR; Myopathy, X-linked, with postural muscle atrophy [#MIM:300696]/ XLR; Reducing body myopathy, X-linked 1a, severe, infantile or early childhood onset [#MIM:300717]/ XLD; Reducing body myopathy, X-linked 1b, with late childhood or adult onset [#MIM:300718]/ XL; Scapulop…	X-linked	VUS	PM2 ,PM4, PP3	De novo	VUS	___	2022-06-06	No	___	___
Case201	15503	Myopathy	Solo	whole exome sequencing	Yes	Negative	Male	20 Y	Adulthood	Childhood	Retinitis pigmentosa (peripheral visual field loss; nyctalopia) with onset at the age of 5-year old; Myopathy (feet weakness extended to hands) with onset at the age of 17-year old; Muscle weakness, proximal>distal, lower>upper; Swallowing difficulty; Hands tremor; Thenar & hypothenar atrophy; Muscle wasting in distal of limbs; Loss of ambulation since last month; Skin rash, generalized (suspecte…	Overlapping	DYSF	Inframe deletion	Novel	Chr2:71883398CATCTGTGATTGGTGA>C	Homozygote	NM_003494.4	c.4619_4633delCTGTGATTGGTGAAT	p.Ser1540_Glu1544del	Miyoshi muscular dystrophy 1 [#MIM: 254130]/AR; Muscular dystrophy, limb-girdle, autosomal recessive 2[#MIM: 253601]; Myopathy, distal, with anterior tibial onset [#MIM: 606768]/AR	Autosomal Recessive	VUS	PM2/PP3/PM4	Inherited	Positive	___	2022-09-06	No	___	___
Case202	15508	LGMD	Solo	whole exome sequencing	Yes	Negative	Male	22 Y	Adulthood	Childhood	Onset at the age of 16-year old; Muscle weakness, proximal>distal, lower>upper limbs; Difficulty walking, running & climbing steps; Respiratory problem, mild; Mild facial weakness; Abnormal gait; Loss of tip-toe walking; Elevated level of CPK, LDH, SGOT & SGPT; Muscle biopsy: muscular dystrophy with perimysial chronic inflammation; IHC findings suggestive of Dysferlinopathies; EMG-NCV: polymyopat…	Dystrophies	DYSF	Splicing	Novel	Chr2:71797465G>T	Homozygote	NM_003494.4	c.3031+1G>T	___	Miyoshi muscular dystrophy 1 254130 AR;Muscular dystrophy, limb-girdle, autosomal recessive 2 253601 AR;Myopathy, distal, with anterior tibial onset 606768 AR	Autosomal Recessive	Likely Pathogenic	PVS1-PM2	Not checked	Positive	___	2022-12-06	No	___	___
Case203	15595	LGMD	Solo	whole exome sequencing	No	Negative	Male	44 Y	Adulthood	Adulthood	Onset from 8-month ago with lower muscle weakness, extended to upper limb; Progressive muscle weakness, proximal; Lower limbs neuropathy from 2-3 months ago; Waddling gait ; Difficulty running & climbing steps; Mild muscle atrophy; Bilateral calf hypertrophy; Lordosis; High CPK, LDH, Aldolase; EMG-NCV: irritable myopathy.	Overlapping	DNM2	Large CNV duplication	Novel	Chr19:10934461-10934577	___	NM_001005360.3	Exon 17	___	Centronuclear myopathy 1; #MIM160150, AD Charcot-Marie-Tooth disease, axonal type 2M; #MIM606482, AD Charcot-Marie-Tooth disease, dominant intermediate B; #MIM606482, AD Lethal congenital contracture syndrome 5; #MIM615368, AR	___	VUS	___	Not checked	VUS	___	2022-05-07	No	No	___
Case204	15622	Myopathy	Solo	whole exome sequencing	No	Negative	Male	53 Y	Adulthood	Adulthood	Onset at the age of 43-year old with foot muscle weakness, extended to hands; Muscle weakness, proximal>distal, lower>upper limbs; Facial weakness; Abnormal gait; Difficulty walking, running & climbing steps; Positive Gowers sign; Elevated level of CPK; EMG-NCV: chronic non-inflammatory myopathic features; Muscle biopsy: mild myopathic atrophy.	Overlapping	DYSF	Missense	Known	Chr2:71883301A>C	Homozygote	NM_001130987.2	c.4636A>C	p.Thr1546Pro	Miyoshi muscular dystrophy 1 [MIM#254130]/AR; Muscular dystrophy, limb-girdle, autosomal recessive 2 [MIM#253601]/AR; Myopathy, distal, with anterior tibial onset [MIM#606768]/AR	Autosomal Recessive	VUS	PM2,PM3_Supporting,PP3	Not checked	VUS	PMID: 34418069	2022-06-28	No	___	___
Case205	15708	Mitochondrial disease	Solo	whole exome sequencing	Yes	Negative	Male	24 Y	Adulthood	Adulthood	Transient strabismus 4-year ago; Left ptosis; Left eye deviated down & outward, transient; Right eye deviated up & outward; Ophthalmoplegia; Muscle biopsy: slight myopathic changes with some cox-negative fibers but no ragged-red fiber compatible with mitochondrial myopathy; EMG-NCV: suggestive of neuromuscular junction instability.	Overlapping	SCN4A	Missense	Novel	Chr17:62028907G>T	Homozygote	NM_000334.4	c.2730C>A	p.Asp910Glu	Hyperkalemic periodic paralysis, type 2; #MIM170500, AD; Hypokalemic periodic paralysis, type 2; #MIM613345, AD; Myasthenic syndrome, congenital, 16; #MIM 614198, AR; Myotonia congenita, atypical, acetazolamide-responsive; #MIM608390, AD; Paramyotonia congenita; #MIM168300, AD	Autosomal Recessive	VUS	PM2, PP2, BP4	Not checked	VUS	___	2022-05-15	No	___	___
Case206	15931	ALS	Solo	whole exome sequencing	Yes	Positive	Female	55 Y	Adulthood	Adulthood	Onset at the age of 53-year old with lower muscle weakness & gait abnormality; Muscle weakness & atrophy; Bulbar dysfunction; Sleep apnea.	Motor Neuron Disease	OPTN	Stop gain	Novel	Chr10:13154519C>T	Homozygote	NM_021980.4	c.436C>T	p.Gln146*	Amyotrophic lateral sclerosis 12 with or without frontotemporal dementia [#MIM:613435] AD, AR	Autosomal Recessive	Likely Pathogenic	PVS1, PM2	Not checked	Positive	___	2022-04-07	No	___	___
Case207	16003	Hereditary ataxia	Solo	whole exome sequencing	Yes	Negative	Male	22 Y	Adulthood	Adulthood	Onset from 2-year ago with seizures, tonic-clonic; Ataxia from 6-month ago; Difficulty heel & tip-toe walking; Hand tremor; Dysarthria; Echocardiogram: Mild TR; EMG-NCV: moderate sensorimotor axonal polyneuropathy, chronic mild to moderate neurogenic process.	Overlapping	COQ4	Missense	Novel	Chr9:131087502G>A	Homozygote	NM_016035.5	c.283G>A	p.Gly95Ser	Coenzyme Q10 deficiency, primary, 7 [#MIM:616276]/AR	Autosomal Recessive	VUS	PM2,PP3	Not checked	VUS	___	2022-05-28	No	___	___
Case208	16076	Congenital myopathy	Solo	whole exome sequencing	Yes	Negative	Female	28 Y	Adulthood	Adulthood	R/O Congenital Myopathy.	Myopathies	DNM2	Missense	Novel	Chr19:10922947G>A	Heterozygote	NM_001005360.3	c.1565G>A	p.Arg522His	Centronuclear myopathy 1 [#MIM:160150],AD; Charcot-Marie-Tooth disease, axonal type 2M [#MIM:606482],AD; Charcot-Marie-Tooth disease, dominant intermediate B [#MIM:606482],AD; Lethal congenital contracture syndrome 5 [#MIM:615368],AR	Autosoaml Dominant	Likely Pathogenic	PM2-PM6, PP5, PP3	Not checked	Positive	___	2022-11-07	No	___	___
Case209	16094	Hereditary Neuropathy	Solo	whole exome sequencing	No	Positive	Male	34 Y	Adulthood	Childhood	Age of onset 5 years ago with lower muscle weakness & foot drop; Difficulty heel & tip-toe walking; Abnormality of gait, sensory ataxia; Distal lower muscle atrophy & weakness due to neuropathy; Atrophy of thenar due to neuropathy; Pes cavus; Positive Romberg test; EMG-NCV: chronic sensorimotor polyneuropathy.	Neuropathies	PRPS1	Missense	Novel	ChrX:106882584G>C	Hemizygote	NM_002764.4	c.182G>C	p.Gly61Ala	Arts syndrome; #MIM301835, XLR, Charcot-Marie-Tooth disease, X-linked recessive, 5; #MIM311070, XLR , Deafness, X-linked 1; #MIM304500, XL , Gout, PRPS-related; #MIM300661, XLR Phosphoribosylpyrophosphate synthetase superactivity; #MIM 300661, XLR	X-linked	VUS	PM2, PP2, PP3	Not checked	VUS	___	2022-06-25	Multiplex Ligation Dependent Probe Amplification (MLPA) (P033 MRC Holland) was performed in order to screen duplication or deletion of a 1.5 Mb region on chromosome 17p11.2 causing Charcot-Marie-Tooth disease type 1A (CMT1A) and Hereditary Neuropathy with liability to Pressure Palsies (HNPP), respectively.	___	___
Case210	16146	Hereditary paraplagia	Solo	whole exome sequencing	Yes	Negative	Male	1 Y	Childhood	Childhood	Psychomotor delay; Mild mental retardation; Seizures; Hirschsprung; Speech delay; Delayed walking; Prominent forehead; Micrognathia; Low set ears, mild; Nystagmus; Myopia; Small & short nose; Depressed nasal bridge; Full cheeks; Polydactyly, postaxial, hands; Polydactyly, Lt. foot;. R/O Acrocallosal syndrome or Greig Cephalopolysyndactyly syndrome.	Myopathies	MYO18B	Missense	Novel	Chr22:26176055C>T	Homozygote	NM_032608.7	c.2101C>T	p.Arg701Trp	Klippel-Feil syndrome 4, autosomal recessive, with myopathy and facial dysmorphism [#MIM:616549] AR	Autosomal Recessive	VUS	PM2	Not checked	Unclear	___	2022-07-28	No	___	___
Case211	16176	Leukodystrophy	Solo	whole exome sequencing	Yes	Negative	Male	2 Y	Childhood	Childhood	Onset at the age of 18-mo with abnormal gait; Spastic gait; Flat foot; Brain MRI revealed delayed myelination or hypomyelination suggestive of Leukodystrophies; Hx of Hypothyroidism.	Hereditary Paraplegia	GJC2	Missense	Novel	Chr1:228345473G>T	Homozygote	NM_020435.4	c.14G>T	p.Ser5Ile	?Spastic paraplegia 44, autosomal recessive [#MIM:613206]/AR; Leukodystrophy, hypomyelinating, 2 [#MIM:608804]/AR; Lymphatic malformation 3 [#MIM:613480]/AD	Autosomal Recessive	VUS	___	Inherited	VUS	___	2022-05-31	No	___	___
Case212	16197	Myotonia	Solo	whole exome sequencing	Yes	Negative	Male	13 Y	Childhood	Childhood	Delayed walking; Muscle weakness, upper & lower limbs; Difficulty running & rising from seated position; Increased muscle fatiguability; Handgrip myotonia; Short attention span; EMG-NCV: suggestive of myotonia.	Myotonic syndrome	CLCN1	Splicing	Known	Chr7:143036416G>A	Homozygote	NM_000083.3	c.1471+1G>A	___	Myotonia congenita, dominant [#MIM:160800] AD; Myotonia congenita, recessive [#MIM:255700] AR; Myotonia levior, recessive[#MIM:160800]	Autosomal Recessive	Pathogenic	PVS1, PM2-Supporting, PP5] BS2?	Not checked	Positive	PMID: 24452722, 25065301, 27614575, 33304817, 8533761, 26502825	2022-12-07	No	___	___
Case213	16199	CMS	Solo	whole exome sequencing	Yes	Negative	Male	12 Y	Childhood	Childhood	Mild to moderate bilateral ptosis since 3 month old; Dysphagia; Chewing difficulty& fatigue in jaw.	Overlapping	RAPSN	Splicing	Novel	Chr11:47470726T>C	Homozygote	NM_005055.5	c.-210A>G	___	Fetal akinesia deformation sequence 2; #MIM618388, AR; Myasthenic syndrome, congenital, 11, associated with acetylcholine receptor deficiency; #MIM616326, AR	Autosomal Recessive	Pathogenic	___	Not checked	Positive	___	2022-02-06	No	___	SCV001755525
Case214	16270	LGMD	Solo	whole exome sequencing	Yes	Negative	Female	9 Y	Childhood	Childhood	Onset at the age of 8-year old with difficulty climbing steps; Muscle weakness, proximal>distal; Calf hypertrophy, lower>upper; Positive Gowers sign; Elevated level of CPK, LDH & Aldolase; Elevated LFT; EMG-NCV: myopathic process; Muscle biopsy: muscular dystrophy; IHC: compatible with beta or less probably delta sarcoglycanopathy.	Dystrophies	SGCB	Large CNV deletion	Known	NC_000002.11:g.(?_52899597)_(52899806_?)del	___	NM_000232.5	Exon 2	___	Muscular dystrophy, limb-girdle, autosomal recessive 4 [#MIM:604286]/AR	___	Likely Pathogenic	CNV	Not checked	Positive	___	2022-06-28	No	Confirmed by MLPA	___
Case215	16310	Hereditary Neuropathy	Solo	whole exome sequencing	Yes	Negative	Female	36 Y	Adulthood	Adulthood	Onset at the age of 26-year old with lower limbs neuropathy & weakness; Mild upper limbs neuropathy; Impaired toe-walking; Abnormal gait; EMG-NCV: chronic axonal type sensorimotor polyneuropathy	Neuropathies	MPV17	Inframe indel	Known	Chr2:27535560ATCT>AACA	Homozygote	NM_002437.5	c.263_265delinsTGT	p.Lys88_Met89delinsMetLeu	Charcot-Marie-Tooth disease, axonal, type 2EE [#MIM: 618400]/AR; Mitochondrial DNA depletion syndrome 6 (hepatocerebral type) [#MIM: 256810]/AR	Autosomal Recessive	VUS	PM2, PP2	Inherited	VUS	PMID: 22964873	2022-06-20	No	___	___
Case216	16504	ALS	Solo	whole exome sequencing	Yes	Negative	Male	50 Y	Adulthood	Not reported	Onset from 5-month ago with hand neuropathy; Muscle fasciculation; Distal muscle weakness & atrophy due to neuropathy; Hand tremor; Thenar & hypothenar atrophy due to neuropathy; Difficulty tip-toe and heel walking; Brain MRI: high signal focus in right frontal lobe associated with peripheral white matter edema suggestive of cortical hemorrhage and another focus of cortical abnormal signal in rig…	Negative	___	___	___	___	___	___	___	___	___	Sporadic	___	___	___	Negative	___	2022-06-27	No	___	___
Case217	16537	Metabolic myopathy	Solo	whole exome sequencing	Yes	Negative	Male	16 Y	Childhood	Childhood	Onset at the age of 15-year old with muscle weakness; Generalized muscle wasting since 7-year old; Muscle cramps; Muscle biopsy suggestive of GSD, probably type III; Elevated level of CPK; Mild abnormal EEG; EMG-NCV: mild non-inflammatory myopathic process; Muscle biopsy revealed vacuolar myopathies with excess glycogen.	Myopathies	PYGM	Missense	Known	Chr11:64525719T>C	Homozygote	NM_005609.4	c.527A>G	p.Gln176Arg	McArdle disease [#MIM:232600]/AR	Autosomal Recessive	VUS	PM2, PP3	Not checked	VUS	PMID: 29143597	2022-06-16	No	___	___
Case218	16613	Myopathy	Solo	whole exome sequencing	Yes	Negative	Female	41 Y	Adulthood	Childhood	Mild hypotonia since birth; Lower muscle weakness since 7 years old; Upper muscle weakness (proximal); Muscle cramp; Frequent falls; Feet drop; Difficulty running and climbing steps; Mild facial weakness; Fingers flexor weakness; Mild right calf hypertrophy; Decreased fetal movements; EMG: is in favor of a chronic myopathic disorder; Echocardiography: Mild MR, MVP & TR; Muscle biopsy: Nemaline my…	Myopathies	MYPN	Stop gain	Novel	Chr10:69921491C>T	Homozygote	NM_032578.4	c.1465C>T	p.Arg489Ter	Cardiomyopathy, dilated, 1KK; #MIM615248, AD; Cardiomyopathy, familial restrictive, 4; #MIM615248, AD; Cardiomyopathy, hypertrophic, 22; #MIM615248, AD; Nemaline myopathy 11, autosomal recessive; #MIM617336, AR	Autosomal Recessive	Pathogenic	PM2, PVS1, PP4	Not checked	Positive	___	2022-10-05	No	___	___
Case219	16702	CMT	Solo	whole exome sequencing	Yes	Negative	Male	36 Y	Adulthood	Adulthood	Consanguinous parents, sporadic case, poor balance started 22 years, kyphoscoliosis started 9 years, muscle weakness, pes cavus, hereditary uniform demyelinating sensory motor polyneuropathy reported in NCV.	Neuropathies	SH3TC2	Missense	Known	Chr5:148386608G>A	Homozygote	NM_024577.4	c.3511C>T	p.Arg1171Cys	Charcot-Marie-Tooth disease, type 4C (CMT4C) [#MIM:601596], AR; Mononeuropathy of the median nerve, mild (MNMN)[#MIM:613353], AD	Autosomal Recessive	Likely Pathogenic	PM2, PM5, PP3, PP5	Not checked	Positive	PMID: 23466821, 25429913, 30001926	2023-01-26	Multiplex Ligation Dependent Probe Amplification (MLPA) screening for deletions and duplications in CMT/HNPP region was previously performed in this laboratory for this individual and revealed no Del/Dup in PMP22 gene of this individual.	___	SCV001755646
Case220	16784	Muscular dystrophy	Solo	whole exome sequencing	Yes	Positive	Female	20 Y	Adulthood	Childhood	Age of onset 3 years ago with lower muscle weakness extended to upper muscle and mild neuropathy; Difficulty running, walking & climbing upstairs; Increased CPK; EMG & NCS: Proximal inflammatory myopathy (upper & lower limbs) with normal of peripheral nervous & negative decrement test.	Dystrophies	SGCB	Missense	Novel	Chr4:52894903G>T	Homozygote	NM_000232.5	c.614C>A	p.Thr205Asn	Muscular dystrophy, limb-girdle, autosomal recessive 4; #MIM604286, AR	Autosomal Recessive	VUS	PM2, PP3	Not checked	VUS	___	2022-02-06	No	___	___
Case221	16862	Congenital Myotonia	Solo	whole exome sequencing	Yes	Negative	Male	44 Y	Adulthood	Childhood	Age of onset: 7 years old; Muscle cramp; Handgrip myotonia; Tongue Myotonia; Muscle hypertrophy of limbs; Imbalance from 3 or 4 years ago; EMG-NCV: compatible with a myotonic disorder with significant drop in CMAP amplitude after short exercise test which is compatible with chloride channel myotonia, probably becker type.	Overlapping	CLCN1	Missense	Novel	Chr7:143029920C>T	Homozygote	NM_000083.3	c.1355C>T	p.Pro452Leu	Myotonia congenita, dominant; #MIM160800, AD; Myotonia congenita, recessive; #MIM255700, AR Myotonia levior, 160800-AD	Autosomal Recessive	VUS	PM2, PP3, PP4	Not checked	VUS	___	2022-05-17	No	___	___
Case222	17028	Myopathy	Solo	whole exome sequencing	No	Negative	Female	35 Y	Adulthood	Adulthood	Onset with frequent falls & difficulty climbing steps from 10 years ago; Muscle weakness & wasting of lower limbs (proximal<distal); Positive Gowers sign; EMG: myothic process, Muscle biopsy: marked muscle atrophy with severe endomysial fibrosis & multiple red-rimmed vacuoles; Slightly elevated CPK; MRIs revealed fatty degeneration in muscles.	Myopathies	MYH7	Missense	Novel	Chr14:23888715C>G	Heterozygote	NM_000257.4	c.3830G>C	p.Arg1277Pro	Cardiomyopathy, dilated, 1S; #MIM613426, AD Cardiomyopathy, hypertrophic, 1; #MIM192600, AD, DD Laing distal myopathy; #MIM160500, AD Left ventricular noncompaction 5; #MIM613426, AD Myopathy, myosin storage, autosomal dominant; #MIM608358, AD; Myopathy, myosin storage, autosomal recessive; #MIM255160, AR; Scapuloperoneal syndrome, myopathic type; #MIM181430, AD	Autosoaml Dominant	VUS	PM2, PP2, PP3	Not checked	VUS	___	2022-06-13	No	___	___
Case223	17089	CMT	Solo	whole exome sequencing	Yes	Negative	Female	14 Y	Childhood	Childhood	Clinical Data: Onset at the age of 10-year old with distal neuropathy & mild weakness; Sever lower muscle sensory loss; EMG-NCV: chronic sensory & motor axonal polyneuropathy; Bilateral sensorineural hearing loss, moderate, Lt.>Rt	Neuropathies	RETREG1	Stop gain	Novel	Chr5:16565897G>A	Homozygote	NM_001034850.3	c.433C>T	p.Gln145Ter	Neuropathy, hereditary sensory and autonomic, type IIB; #MIM613115, AR	Autosomal Recessive	Pathogenic	PM2, PVS1, PP5	Not checked	Positive	___	2022-06-23	No	___	___
Case224	17099	Myopathy	Solo	whole exome sequencing	Yes	Negative	Female	14 Y	Childhood	Childhood	Onset at the age of 10 years old with generalized muscle weakness & wasting; Difficulty climbing steps & running; Muscle weakness, proximal> distal; EMG, NCV: Mild myopathy, with upper motor neuron disease as DDx.	Negative	___	___	___	___	___	___	___	___	___	Sporadic	___	___	___	Negative	___	2022-06-15	No	___	___
Case225	17115	Myopathy	Solo	whole exome sequencing	No	Negative	Male	8 Y	Childhood	Childhood	Onset at the age of 6.5-year old with positive Gowers sign; Difficulty running & climbing steps; Muscle biopsy: slight atrophic changes with type 1 fibers predominance & fiber type grouping, no ragged red fiber & no cox-negative; EMG-NCV: mild myopathic process without spontaneous activity (non-irritable myopathy).	Dystrophies	COL12A1	Missense	Novel	Chr6:75866072C>G	Heterozygote	NM_004370.6	c.3151G>C	p.Val1051Leu	?Ullrich congenital muscular dystrophy 2; #MIM616470, AR; Bethlem myopathy 2; #MIM616471, AD	Autosoaml Dominant	VUS	PM2, PP2	De novo	VUS	___	2022-06-23	No	___	___
Case226	17473	CMT	Solo	whole exome sequencing	Yes	Positive	Female	30 Y	Adulthood	Adulthood	Onset at the age of 20-year old with frequent fallings; Lower & upper distal muscle weakness; Atrophy due to neuropathy; Foot drop; Muscle Cramps; Thenar and hypothenar atrophy; EMG/NCV: severe neurogenic changes suggestive of chronic motor> sensory axonal polyneuropathy.	Overlapping	DNM2	Large CNV duplication	Novel	Chr19:10916589-10923055	___	NM_001005360.3	Exom 13-15	___	Centronuclear myopathy 1;#MIM160150,AD Charcot-Marie-Tooth disease, axonal type 2M;#MIM606482,AD Charcot-Marie-Tooth disease, dominant intermediate B;#MIM606482,AD Lethal congenital contracture syndrome 5;#MIM615368,AR	___	VUS	CNV	Not checked	VUS	___	2022-06-27	No	No	___
Case227	17495	Hereditary paraplagia	Solo	whole exome sequencing	No	Negative	Female	9 Y	Childhood	Childhood	Onset at the age of 1-year old; Foot drop; Frequent fallings; Spastic gait; Lower limb spasticity & weakness; Urinary urgency; Brain MRI: mildly thin corpus callosum.	Hereditary Paraplegia	REEP2	Large CNV duplication	Novel	Chr5:137774895-137774931	___	NM_001271803.2	Exon 1	___	?Spastic paraplegia 72, autosomal dominant; #MIM615625, AD,AR ?Spastic paraplegia 72, autosomal recessive; #MIM615625, AD,AR	___	VUS	___	Not checked	VUS	___	2022-06-27	No	No	___
Case228	17526	Myopathy	Solo	whole exome sequencing	Yes	Negative	Male	31 Y	Adulthood	Adulthood	Age of onset 2-3 years ago with proximal lower limb muscle weakness & cramps; Muscle weakness, lower>upper; Winging of scapula; Abnormal gait; Difficulty running & climbing steps; Pseudohypertrophy of calves; Positive Gowers sign; Elevated level of CPK & LDH; EMG-NCV: non-irritable myopathic features.	Dystrophies	FKRP	Missense	Novel	Chr19:47259561A>C	Homozygote	NM_024301.5	c.854A>C	p.Glu285Ala	Muscular dystrophy-dystroglycanopathy (congenital with brain and eye anomalies), type A, 5; #MIM613153, AR; Muscular dystrophy-dystroglycanopathy (congenital with or without mental retardation), type B, 5; #MIM606612, AR; Muscular dystrophy-dystroglycanopathy (limb-girdle), type C, 5; #MIM607155, AR	Autosomal Recessive	Likely Pathogenic	PM2, PP2, PP3, PS4	Not checked	Positive	___	2022-06-28	No	___	___
Case229	17555	SMA	Solo	whole exome sequencing	Yes	Negative	Female	25 Y	Adulthood	Childhood	Onset age: 10 years old; Pes cavus; Easy fatigability; Muscle spasm; Spastic gait; Gait ataxia; Foot dorsiflexor weakness; Scoliosis; Hand tremor; Increased DTR; Babinski sign; EMG: Chronic neurogenic changes in distal lower limbs muscles; Thoracic spine MRI suggestive of colloid cyst; Mildly abnormal Echocardiography.	Negative	___	___	___	___	___	___	___	___	___	Sporadic	___	___	___	Negative	___	2023-02-01	Polymerase chain reaction (PCR) and Triplet Primed (TP) PCR analysis of the GAA repeat within intron 1 of the FXN gene previously performed in this center and revealed normal allele size for this individual.	___	___
Case230	17779	Muscular dystrophy	Solo	whole exome sequencing	Yes	Positive	Male	18 Y	Adulthood	Childhood	Age of onset 5 years old; Positive Gowers sign; Lower muscle weakness & pain, proximal>distal; Waddling gait; Pseudohypertrophy of calves; Difficulty running & climbing steps; EMG-NCV: mild myopathic process; High CPK; Muscular biopsy: muscular dystrophy other than Duchenne.	Dystrophies	DMD	Large CNV duplication	Novel	ChrX:32827607-33038319	___	NM_004006.3	Exom 2-7	___	Becker muscular dystrophy; #MIM300376, XLR Cardiomyopathy, dilated, 3B; #MIM302045, XL Duchenne muscular dystrophy; #MIM310200, XLR	___	Likely Pathogenic	___	Not checked	Unclear	___	2022-06-28	No	Confirmed by MLPA	___
Case231	17848	Hereditary Neuropathy	Solo	whole exome sequencing	Yes	Negative	Male	21 Y	Adulthood	Not reported	Mild Mental Retardation; Tiptoe walking in childhood; Delayed speech; Spasticity in lower limbs; Spastic gait; Contractures in limbs; Lateral deviation in first toe; Hammer toes; Scoliosis; EMG-NCV: compatible with chronic axonal sensorimotor polyneuropathy; Brain MRI: mild brain atrophy, moderate cerebellar atrophy, arachnoid cyst in posterior fossa.	Overlapping	KIF1A	Missense	Novel	Chr2:241737138C>T	Heterozygote	NM_004321.8	c.32G>A	p.Arg11Gln	NESCAV syndrome; #MIM614255, AD; Neuropathy, hereditary sensory, type IIC; #MIM614213, AR; Spastic paraplegia 30, autosomal dominant; #MIM610357, AD,AR; Spastic paraplegia 30, autosomal recessive; #MIM610357, AD, AR	Autosoaml Dominant	Pathogenic	___	Not checked	Positive	___	2022-06-30	No	___	___
Case232	18032	CMT	Solo	whole exome sequencing	No	Negative	Female	52 Y	Adulthood	Childhood	Onset since 7-year old with upper limbs neuropathy; Mild neuropathy, lower & upper limbs; Difficulty heel>tip-toe walking; EMG-NCV: chronic mild asymmetric polyneuropathy with demyelinating feature suggestive of HNPP.	Neuropathies	PMP22	Frameshift	Novel	Chr17:15142905TG>T	Heterozygote	NM_000304.4	c.201delC	p.Thr68Profs*2	? Neuropathy, inflammatory demyelinating [#MIM: 139393], ? AD; Charcot-Marie-Tooth disease, type 1A [#MIM: 118220], AD; Charcot-Marie-Tooth disease, type 1E [#MIM: 118300], AD; Dejerine-Sottas disease [#MIM: 145900], AD, AR; Neuropathy, recurrent, with pressure palsies [#MIM: 162500], AD, Roussy-Levy syndrome [#MIM: 180800], AD	Autosoaml Dominant	Likely Pathogenic	PVS1-PM2	Not checked	Positive	___	2022-02-08	No	___	___
Case233	18109	Hereditary ataxia	Solo	whole exome sequencing	No	Negative	Female	64 Y	Adulthood	Adulthood	Age of onset: 61-year old; Ataxic gait; Tremor in hands; Anosmia; Mild LV enlargement in Doppler Echocardiography.	Overlapping	ATXN2	Missense	Novel	Chr12:111948287C>A	Heterozygote	NM_002973.4	c.1658G>T	p.Gly553Val	Spinocerebellar ataxia 2; #MIM183090/AD {Amyotrophic lateral sclerosis, susceptibility to, 13}; #MIM183090/AD {Parkinson disease, late-onset, susceptibility to}; #MIM168600/AD, Mu	Autosoaml Dominant	VUS	PM2, PP3	Not checked	VUS	___	2022-11-13	No	___	___
Case234	18178	CMT	Solo	whole exome sequencing	No	Positive	Male	41 Y	Adulthood	Not reported	Muscle face fasciculations, unilateral; Generalized muscle weakness; Ataxia, cerebellar.	Neuropathies	MPZ	Missense	Known	Chr1:161277181G>A	Heterozygote	NM_000530.8	c.101C>T	p.Thr34Ile	Charcot-Marie-Tooth disease, dominant intermediate D [#MIM:607791], AD; Charcot-Marie-Tooth disease, type 1B [#MIM:118200], AD; Charcot-Marie-Tooth disease, type 2I [#MIM:607677], AD; Charcot-Marie-Tooth disease, type 2J [#MIM:607736], AD; Dejerine-Sottas disease [#MIM:145900], AD, AR; Hypomyelinating neuropathy, congenital, 2 [#MIM:618184], AD; Roussy-Levy syndrome [#MIM:180800], AD	Autosoaml Dominant	Likely Pathogenic	PM1, PM2, PP2, PP3, PP5	Inherited	Positive	PMID:8797476;12090401	2022-08-18	Multiplex Ligation Dependent Probe Amplification (MLPA) screening for deletions and duplications in CMT/HNPP region was previously performed in this laboratory for this individual and revealed no Del/Dup in PMP22 gene of this individual.	___	___
Case235	18247	Myopathy	Solo	whole exome sequencing	Yes	Negative	Female	23 Y	Adulthood	Adulthood	Onset at the age of 20-year old with foot drop, abnormality of gait & lower muscle weakness; Upper limbs weakness, proximal; High CPK; EMG: Myopathy; Muscle biopsy: hereditary inclusion myopathy; Rt. leg & femur MRI: fatty degeneration due to myopathy.	Myopathies	GNE	Missense	Known	Chr9:36236861C>T	Homozygote	NM_001128227.3	c.830G>A	p.Arg277Gln	Nonaka myopathy; #MIM605820, AR; Sialuria; #MIM269921, AD	Autosomal Recessive	Pathogenic	PM2, PM1, PP2, PP5, PS1, PM5	Not checked	Positive	PMID: 24695763, PMID: 29480215, 24695763	2022-11-07	No	___	___
Case236	18362	Hereditary Neuropathy	Solo	whole exome sequencing	No	Negative	Male	15 Y	Childhood	Childhood	Onset at the age of 13-year old with abnormality of gait & lower muscle weakness & pain due to neuropathy; Hand tremor; Mild pes cavus; Difficulty heel & tip-toe walking; EMG-NCV: chronic axonal type sensorimotor polyneuropathy; High CPK.	Neuropathies	HARS1	Large CNV duplication	Novel	Chr5:140056909-140057007	___	NM_002109.6	Exon 8	___	Charcot-Marie-Tooth disease, axonal, type 2W; #MIM616625, AD Usher syndrome type 3B; #MIM614504, AR	___	VUS	___	Not checked	VUS	___	2022-04-07	No	No	___
Case237	18419	CMT	Solo	whole exome sequencing	No	Negative	Female	32 Y	Adulthood	Childhood	Onset at the age of 16-year old with fever & lower muscle pain; Distal upper & lower muscle weakness & atrophy due to neuropathy; Wheelchair bound from 4-year ago; Pes cavus; EMG-NCV: suggestive of chronic demyelinating sensorimotor polyneuropathy with superimposed axonal damage.	Negative	___	___	___	___	___	___	___	___	___	Sporadic	___	___	___	Negative	___	2022-12-09	Multiplex Ligation Dependent Probe Amplification (MLPA) screening for deletions and duplications in CMT/HNPP region was previously performed in this laboratory for this individual and revealed no Del/Dup in PMP22 gene of this individual.	___	___
Case238	18422	Myopathy	Solo	whole exome sequencing	Yes	Positive	Female	40 Y	Adulthood	Childhood	Age of onset: 11 years old with wasting of lower muscle, difficulty running & climbing steps; Lower & upper muscle weakness; Positive Gower sign; Abnormality of gait; Decreased muscle force; High CPK; Hypothyroidism EMG-NCV: chronic myopathic process; Muscle biopsy: muscular dystrophy.	Dystrophies	TRIM32	Frameshift	Novel	Chr9:119461527delA	Homozygote	NM_012210.4	c.1506delA	p.Val504Trpfs*30	?Bardet-Biedl syndrome 11; #MIM615988, AR; Muscular dystrophy, limb-girdle, autosomal recessive 8; #MIM254110, AR	Autosomal Recessive	Likely Pathogenic	PM2, PVS1	Not checked	Positive	___	2022-05-07	No	___	___
Case239	18460	Hereditary Neuropathy	Solo	whole exome sequencing	Yes	Positive	Male	26 Y	Adulthood	Adulthood	Onset at the age of 20-year old with lower muscle weakness & atrophy due to neuropathy; Distal upper muscle weakness & atrophy due to neuropathy; Pes cavus; Hand tremor; Difficulty Tip-toe & heel walking.	Negative	___	___	___	___	___	___	___	___	___	Familial	___	___	___	Negative	___	2022-07-30	No	___	___
Case240	18543	SMA	Solo	whole exome sequencing	Yes	Negative	Male	2 Y	Childhood	Childhood	Onset age: 4-month; Developmental delay, motor; inability to hold neck; Hypotonia; Elevated CPK level; EMG-NCV: generalized neurogenic process involving all limbs, more severe in upper limbs, highly suggestive of SMA, type 1. MLPA for exons VII and VIII in SMN1 & SMN2 genes in this laboratory revealed this individual has inherited two copies of exons 7&8 in SMN1 gene. Parents are distant relative…	Dystrophies	LAMA2	Frameshift	Novel	Chr6:129826422delA	Homozygote	NM_000426.4	c.8625delA	p.Ala2876Profs*27	Muscular dystrophy, congenital, merosin deficient or partially deficient; #MIM607855/AR; Muscular dystrophy, limb-girdle, autosomal recessive 23; #MIM618138/AR	Autosomal Recessive	Pathogenic	___	Not checked	Positive	___	2023-03-08	Multiplex Ligation Dependent Probe Amplification (MLPA) (P021 MRC Holland) for exons VII and VIII in SMN1 & SMN2 genes.	___	___
Case241	18563	Myopathy	Solo	whole exome sequencing	Yes	Negative	Female	4 Y	Childhood	Childhood	Onset at birth; Hypotonia; Poor sucking; Developmental delay; Difficulty walking, running & climbing steps; Tip-toe walking; Abnormal gait; Muscle weakness & wasting, proximal>distal; Positive Gowers sign; Joints laxity; Prominent calves; Lordosis; Small mouth; Thin lips; High CPK, AST & ALT; EMG/NCV: non-irritable myogenic process.	Overlapping	LMNA	Missense	Novel	Chr1:156105759G>C	Homozygote	NM_170707.4	c.1004G>C	p.Arg335Pro	Cardiomyopathy, dilated, 1A 115200 AD 3Charcot-Marie-Tooth disease, type 2B1 605588 AR 3Emery-Dreifuss muscular dystrophy 2, autosomal dominant 181350 AD 3Emery-Dreifuss muscular dystrophy 3, autosomal recessive 616516 AR 3Heart-hand syndrome, Slovenian type 610140 AD 3Hutchinson-Gilford progeria 176670 AD, AR 3Lipodystrophy, familial partial, type 2 151660 AD 3Malouf syndrome 212112 AD 3Mandibul…	Autosomal Recessive	Likely Pathogenic	PM2, PM1, PP2, PP3, PM5	Not checked	Positive	___	2022-07-17	No	___	___
Case242	18625	CMT	Solo	whole exome sequencing	No	Negative	Male	39 Y	Adulthood	Adulthood	Decreased force in hands & feet fingers; Hands & feet tingling; Hands paresthesia; Difficulty running; Mild ataxia; Imbalance; Thenar muscle atrophy; Cervical spine lordosis & dorsal scoliosis; EDX: generalized demyelinating with superimposed axonal sensory & motor polyneuropathy.	Neuropathies	PMP22	Large CNV duplication	Novel	Chr17:14095303-15458680	___	NM_000304.4	___	___	?Neuropathy, inflammatory demyelinating; #MIM139393, ?AD Charcot-Marie-Tooth disease, type 1A; #MIM118220, AD Charcot-Marie-Tooth disease, type 1E; #MIM118300, AD Dejerine-Sottas disease; #MIM145900, AD, AR Neuropathy, recurrent, with pressure palsies; #MIM162500, AD Roussy-Levy syndrome; #MIM180800, AD	___	Pathogenic	___	Not checked	Positive	___	2022-09-04	No	Confirmed by Oligo-Array CGH	___
Case243	18705	ALS	Solo	whole exome sequencing	No	Negative	Male	61 Y	Adulthood	Adulthood	Onset at the age of 58-year old with upper muscle weakness & pain ; Distal muscles atrophy & cramps; Muscle weakness extended to lower limb; Fasciculations; Bulbar palsy; Wheelchair bound; Sleep testing: severe obstructive sleep apnea, unusual sleep cycle, sleep fragmentation & initial insomnia; EMG: profound active denervation and severe neurogenic changes suggestive of motor neuron disease.	Motor Neuron Disease	DCTN1	Large CNV deletion	Novel	Chr2:74589774-74589858	___	NM_004082.5	Exon 30	___	Neuronopathy, distal hereditary motor, type VIIB; #MIM607641, AD Perry syndrome; #MIM168605, AD {Amyotrophic lateral sclerosis, susceptibility to}; #MIM105400, AD, AR	___	Likely Pathogenic	___	Not checked	Positive	___	2022-07-28	No	No	___
Case244	18914	Muscular dystrophy	Solo	whole exome sequencing	Yes	Negative	Male	25 Y	Adulthood	Not reported	Shortness of breath since childhood; Difficulty climbing stairs & running; Progressive muscle weakness, proximal>distal; Paresthesia & paresis of lower limbs & hands; Pain in lower limbs; Muscle biopsy: myopathic atrophy/ fibrosis & rare necrosis/regeneration in favor of muscular dystrophy; EMG: suggestive of irritable myopathic process; High CPK, LDH, AST & ALT.	Overlapping	DYSF	Inframe deletion	Novel	Chr2:71743319_71743321delTTC	Homozygote	NM_003494.4	c.802_804delTTC	p.Phe268del	Miyoshi muscular dystrophy 1; #MIM254130, AR Muscular dystrophy, limb-girdle, autosomal recessive 2; #MIM253601, AR Myopathy, distal, with anterior tibial onset; #MIM 606768, AR	Autosomal Recessive	VUS	___	Not segregated	VUS	___	2022-07-28	No	___	___
Case245	18936	LGMD	Solo	whole exome sequencing	No	Positive	Female	25 Y	Adulthood	Adulthood	Onset at age 23 years with lower muscle weakness, proximal & distal; Upper muscle weakness from 8-month ago; Facial weakness; Fasciculations; Lordosis; Scoliosis; Muscle wasting; Abnormal gait; Difficulty walking, running & climbing steps; EMG-NCV compatible with active anterior horn cell disease.	Negative	___	___	___	___	___	___	___	___	___	Familial	___	___	___	Negative	___	2022-10-31	Multiplex Ligation Dependent Probe Amplification (MLPA) screening for deletions and duplications in exons 7 & 8 in SMN1 gene was previously performed in this laboratory for this individual which revealed no Del/Dup in this patient.	___	___
Case246	19278	Myopathy	Solo	whole exome sequencing	Yes	Negative	Male	37 Y	Adulthood	Adulthood	Onset age: 32-year old, with difficulty running & walking & foot drop; Muscle weakness, lower & upper limbs, proximal<distal; Increased CPK & LDH; Wheelchair bound; MRI of Lt. femur: marked fatty degeneration; Muscle biopsy: atrophic change, rimmed vacuoles myopathy; EMG: chronic severe myopathic process.	Negative	___	___	___	___	___	___	___	___	___	Sporadic	___	___	___	Negative	___	2022-07-16	No	___	___
Case247	21802	CMT	Solo	whole exome sequencing	No	Negative	Female	11 Y	Childhood	Childhood	Mild distal neuropathy; Mild pes cavus; Positive Gowers sign.	Negative	___	___	___	___	___	___	___	___	___	Sporadic	___	___	___	Negative	___	2022-01-20	Multiplex Ligation Dependent Probe Amplification (MLPA) screening for deletions and duplications in CMT/HNPP region was previously performed in this laboratory for this individual and revealed no Del/Dup in PMP22 gene of this individual.	___	___
Case248	100050	Anterior horn cell disease	Solo	whole exome sequencing	No	Negative	Male	22 Y	Adulthood	Adulthood	Positive Hx. of arrhythmia; Ptosis, unilateral; Pectus excavatum; Fasciculations; Fatigue; Muscle biopsy: suggestive muscular dystrophy; EMG-NCV: chronic neurogenic changes suggestive of chronic ant. horn dis; Elevated CPK & Aldolase; Echocardiography: Moderate RV systolic dysfunction, MVP, Mild MR.	Dystrophies	EMD	Stop gain	Novel	ChrX:153608687C>A	Hemizygote	NM_000117.3	c.359C>A	p.Ser120*	Emery-Dreifuss muscular dystrophy 1, X-linked [#MIM: 310300], XLR	X-linked	Likely Pathogenic	PVS1-PM2	Inherited	Positive	___	2022-07-23	No	___	___
Case249	100260	Myopathy	Solo	whole exome sequencing	No	Negative	Male	22 Y	Adulthood	Not reported	Onset at the age of 17-year old with hand weakness; Difficulty walking, running & climbing steps; Feet weakness; Progressive muscle weakness, upper & lower limbs, proximal>distal; Insulin dependent diabetes mellitus; Prominent abdomen; Lordosis; Hand tremor; Flat feet; Abnormal gait; Elevated CPK, SGOT & SGPT; EMG-NCV: inflammatory myopathic process such as dermatomyositis; Muscle biopsy: lipid m…	Negative	___	___	___	___	___	___	___	___	___	Sporadic	___	___	___	Negative	___	2022-04-08	No	___	___
Case250	100294	CMT	Solo	whole exome sequencing	Yes	Positive	Male	56 Y	Adulthood	Adulthood	Onset age: 40-year old, with difficulty walking & frequent falls; Severe muscle weakness & wasting, distal>proximal, lower>upper limbs; Feet drop; Deformed ankle bones; Bilateral pes cavus; Claw fingers; Hand tremor; Abnormal gait, walk with support; Thenar and hypothenar atrophy; Hearing impairment; Cardiovascular disorder; EDX: chronic severe axonal polyneuropathy.	Neuropathies	MME	Frameshift	Novel	Chr3:154890329G>A	Homozygote	NM_007289.4	c.2081G>A	p.Trp694*	?Spinocerebellar ataxia 43 [#MIM:617018]/ AD; Charcot-Marie-Tooth disease, axonal, type 2T [#MIM:617017]/ AD, AR	Autosomal Recessive	Likely Pathogenic	PVS1 PM2	Not checked	Positive	___	2022-07-16	No	___	___
Case251	100356	Myopathy	Solo	whole exome sequencing	Yes	Negative	Male	62 Y	Adulthood	Not reported	Elevated level of CPK from 7 to 9-year ago; Elevated Aldolase level; Normal EMG-NCV; Muscle biopsy: chronic dystrophic process with fiber type grouping as evidence of reinnervation;	Negative	___	___	___	___	___	___	___	___	___	Sporadic	___	___	___	Negative	___	2022-08-21	No	___	___
Case252	100403	CMT	Solo	whole exome sequencing	Yes	Positive	Male	26 Y	Adulthood	Childhood	Sporadic case, started 12 years ago with distal lower and upper muscle weakness(neuropathy) and atrophy, pes cavus, foot drop , inability walking on heels and chronic demyelinating sensorimotor polyneuropathy reported in EDX	Neuropathies	GJB1	Missense	Known	chrX:70443664T>C	Hemizygote	NM_000166.6	c.107T>C	(p.Leu36Pro)	Charcot-Marie-Tooth neuropathy, X-linked dominant, 1 [MIM#302800]/XLD	X-linked	Likely Pathogenic	(PM1_Moderate/PM2_Moderate/PP2_Supporting/PP3_Moderate)	Not checked	Positive	PMID: 18379723	2024-05-08	Multiplex Ligation Dependent Probe Amplification (MLPA) screening for deletions and duplications in CMT/HNPP region was previously performed in this laboratory for this individual and revealed no Del/Dup in PMP22 gene of this individual.	___	___
Case253	100491	Myopathy	Solo	whole exome sequencing	Yes	Negative	Female	33 Y	Adulthood	Adulthood	Onset: 22-year old with lower muscle weakness, proximal and gait abnormality; Proximal muscle weakness, lower & upper; Lordosis; Foot drop; EMG-NCV: myopathic pattern suggestive of inflammatory myopathic process such as polymyositis; Muscle biopsy: Rimmed vacuole myopathy suggestive of hereditary inclusion body myopathy, GNE myopathy; Slightly increased CPK.	Myopathies	GNE	Missense	Known	Chr9:36217396A>G	Homozygote	NM_001128227.3	c.2228T>C	p.Met743Thr	Nonaka myopathy [#MIM:605820] AR; Sialuria [#MIM:269921] AD	Autosomal Recessive	Pathogenic	PS3,PM1,PM2,PM3,PP3	Not checked	Positive	PMID: 11528398 & 23278550	2022-07-21	No	___	___
Case254	100588	CMS	Solo	whole exome sequencing	Yes	Positive	Male	17 Y	Childhood	Childhood	Childhood onset; Frequent falls; Respiratory & Cardiac problems, arrhythmia, mild MR & TR; Generalized muscle weakness & wasting, proximal>distal, lower>upper limbs; Kyphoscoliosis; Abnormal gait; Proximal laxity; Cervical rigid spine; Flat feet, bilateral; Deformed ankle bones; Difficulty walking, running & climbing steps; Thin build; Elevated CPK; Muscle biopsy: tubular aggregate myopathy with …	Neuromuscular junction disorders	GFPT1	Missense	Novel	Chr2:69586432T>A	Homozygote	NM_002056.4	c.376A>T	p.Ile126Phe	Myasthenia, congenital, 12, with tubular aggregates [#MIM:610542]/ AR	Autosomal Recessive	VUS	PM2 PP3	Inherited	VUS	___	2022-07-28	No	___	___
Case255	100598	CMT	Solo	whole exome sequencing	Yes	Negative	Male	16 Y	Childhood	Childhood	Childhood onset with feet weakness & frequent falls; Difficulty running, walking & climbing steps; Hand weakness; Muscle weakness, distal>proximal, lower>upper limbs; Mild kyphosis; Mild thenar & hypothenar atrophy; Claw fingers & toes; Hands tremor; Bilateral pes cavus; Feet drop; Abnormal gait, Imbalance; EMG-NCV: demyelinating sensorimotor polyneuropathy with secondary axonal loss.	Hereditary Ataxia	SACS	Missense	Known	Chr13:23929369G>C	Homozygote	NM_014363.6	c.1382C>G	p.Pro461Arg	Spastic ataxia, Charlevoix-Saguenay type [#MIM:270550] AR	Autosomal Recessive	VUS	PM2,PP3	Not checked	VUS	PMID: 29277257	2022-02-08	Multiplex Ligation Dependent Probe Amplification (MLPA) screening for deletions and duplications in CMT/HNPP region was previously performed in Imam Hasan Mojtaba genetic lab of Firoozgar Hospital for this individual and revealed no Del/Dup in PMP22 gene of this individual.	___	___
Case256	100600	CMT	Solo	whole exome sequencing	Yes	Negative	Male	38 Y	Adulthood	Adulthood	Onset at the age of 32-year old with feet weakness and paresthesia; Feet>hands weakness; Difficulty heel & tip-toe walking; Distal muscle weakness; Distal legs wasting, mild; Thenar & hypothenar atrophy, mild; Hands tremor; Bilateral pes cavus; Claw toes; Feet drop, mild; Mild abnormal gait; Imbalance; EMG-NCV: chronic axonal sensorimotor polyneuropathy.	Negative	___	___	___	___	___	___	___	___	___	Sporadic	___	___	___	Negative	___	2022-08-13	No	___	___
Case257	100623	Myopathy	Solo	whole exome sequencing	Yes	Positive	Male	35 Y	Adulthood	Adulthood	Onset at the age of 20-year old with proximal muscle weakness, Abnormal gait, Waddling gait; Lordosis; Diplopia; Elevated CPK & Aldolase; Muscle biopsy: chronic myopathic atrophy with type 2 fibers predominance, increased internalization and centralization of nuclei and few basophilic degenerative/regenerative fibers associated with endomysial fibrosis and some moth-eaten fibers; EMG-NCV: compati…	Dystrophies	CAPN3	Missense	Novel	Chr15:42693874C>T	Heterozygote	NM_000070.3	c.1390C>T	p.Leu464Phe	Muscular dystrophy, limb-girdle, autosomal dominant 4 [#MIM: 618129], AD, Muscular dystrophy, limb-girdle, autosomal recessive 1 [#MIM: 253600], AR	Autosoaml Dominant	VUS	PM2-PP3	Not checked	VUS	___	2022-08-20	No	___	___
Case258	100687	SMA	Solo	whole exome sequencing	Yes	Negative	Female	8 Y	Childhood	Childhood	Difficulty walking, running & climbing steps; Feet drop; Positive Gowers sign; Hypotonia; Mildly increased CPK; EMG-NCV: suggestive of diffuse ant. horn cell disease.	Motor Neuron Disease	ASAH1	Missense	Novel	Chr8:17933057C>G	Homozygote	NM_177924.5	c.118G>C	p.Gly40Arg	Farber lipogranulomatosis [#MIM:228000]/ AR; Spinal muscular atrophy with progressive myoclonic epilepsy [#MIM:159950]/ AR	Autosomal Recessive	VUS	PM2, PP3, PP5	Not checked	VUS	___	2022-09-08	Quantitative analysis by Multiplex Ligation Dependent Probe Amplification (MLPA) for exons VII and VIII in SMN1 & SMN2 genes was previously performed in this laboratory for this individual, and revealed two copies of exons 7&8 in SMN1 gene.	___	___
Case259	100689	Motor neuron disease	Solo	whole exome sequencing	Yes	Negative	Female	19 Y	Adulthood	Not reported	Lower limbs muscle wasting since 18-year old; Foot drop; Increased DTR; EMG-NCV: in favor of an active motor neuron disorder or MND-like syndromes.	Negative	___	___	___	___	___	___	___	___	___	Sporadic	___	___	___	Negative	___	2022-09-08	No	___	___
Case260	100740	CMS	Solo	whole exome sequencing	Yes	Negative	Male	29 Y	Adulthood	Childhood	Infancy onset with bilateral ptosis and weak cry; Severe muscle weakness attacks; Respiratory problem; Abnormality of eye movement, ophthalmoparesis; Deep set eyes; Dysphagia; Mild lordosis; Generalized muscle weakness; Difficulty rising from seated position, running & climbing steps; Easy fatiguability; Weakness exacerbated by activities and at night; Poor feeding due to muscle weakness; Chewing…	Neuromuscular junction disorders	CHRNE	Missense	Known	Chr17:4804886T>G	Homozygote	NM_000080.4	c.535A>C	p.Thr179Pro	Myasthenic syndrome, congenital, 4A, slow-channel [#MIM:605809]/ AD, AR; Myasthenic syndrome, congenital, 4B, fast-channel [#MIM:616324]/ AR; Myasthenic syndrome, congenital, 4C, associated with acetylcholine receptor deficiency [#MIM:608931]/ AR	Autosomal Recessive	VUS	PM2, PM3, PP4, BP4	Inherited	VUS	___	2022-08-28	No	___	___
Case261	100815	CMD	Solo	whole exome sequencing	Yes	Negative	Female	1 Y	Childhood	Childhood	Generalized muscle weakness, proximal & distal; No head control; Bell-shaped thorax; Increased CPK; EDX: irritable myopathic process of proximal & distal muscles; Increased SGOT; Brain MRI: high possibility of leukodystrophia.	Dystrophies	LAMA2	Frameshift	Novel	Chr6:129777483T>TG	Homozygote	NM_000426.4	c.6714dup	p.Arg2239Glufs*54	Muscular dystrophy, congenital, merosin deficient or partially deficient [#MIM:607855]/AR; Muscular dystrophy, limb-girdle, autosomal recessive 23 [#MIM:618138]/AR	Autosomal Recessive	Likely Pathogenic	PVS1_very strong,PM2	Not checked	Positive	___	2023-12-09	Multiplex Ligation Dependent Probe Amplification (MLPA) screening for deletions of SMN1 gene was previously performed in this laboratory for this individual which revealed no deletion in this patient.	___	___
Case262	100894	CMS	Solo	whole exome sequencing	No	Positive	Female	17 Y	Childhood	Childhood	Last year onset with strabismus, diplopia & bilateral ptosis; Swallowing difficulty; Generalized muscle weakness, exacerbated at night; Respiratory problem; EDX: neuromuscular junction instability.	Negative	___	___	___	___	___	___	___	___	___	Familial	___	___	___	Negative	___	2022-08-18	No	___	___
Case263	100913	Congenital myopathy	Solo	whole exome sequencing	No	Negative	Female	41 Y	Adulthood	Adulthood	Onset from 35-year old with feet weakness & difficulty climbing steps & rising from seated position; Hand weakness; Mild facial weakness; Sensorineural hearing loss, unilateral; Proximal muscle weakness, lower>upper limbs; Difficulty walking, mild; EMG-NCV: suggestive of myopathic process of mild severity; Muscle biopsy: type 1 fibers atrophy associated with intermyofibrillar network disruption a…	Myopathies	MYH7	Missense	Novel	Chr14:23896028G>C	Heterozygote	NM_000257.4	c.2002C>G	p.His668Asp	Cardiomyopathy, dilated, 1S [#MIM:613426], AD; Cardiomyopathy, hypertrophic, 1 [#MIM:192600], AD, DD; Laing distal myopathy [#MIM:160500], AD; Left ventricular noncompaction 5 [#MIM:613426], AD; Myopathy, myosin storage, autosomal dominant [#MIM:608358], AD; Myopathy, myosin storage, autosomal recessive [#MIM:255160], AR; Scapuloperoneal syndrome, myopathic type [#MIM:181430], AD	Autosoaml Dominant	VUS	PM2-PP3_strong	Not checked	VUS	___	2022-08-20	No	___	___
Case264	100997	Myopathy	Solo	whole exome sequencing	Yes	Negative	Female	23 Y	Adulthood	Childhood	Onset at the age of 8-year with feet weakness & difficulty walking and rising from seated position; Proximal & distal muscle weakness, severe; Respiratory problem; Kyphoscoliosis; Prominent calves; Wheelchair bound from 10-year ago; Elevated SGOT & SGPT; EMG-NCV: chronic myopathic disorders; IHC: gamma Sarcoglycanopathy.	Dystrophies	SGCG	Large CNV deletion	Known	Deletionspanningexon4	___	NM_000231.3	Exon 4	___	Muscular dystrophy, limb-girdle, autosomal recessive 5 [#MIM:253700]/AR	___	Pathogenic	CNV	Not checked	Positive	PMID: 28687063	2022-08-09	No	No	___
Case265	101086	Hereditary paraplagia	Solo	whole exome sequencing	No	Negative	Female	58 Y	Adulthood	Adulthood	Onset at the age of 50-year old with hypoaesthesia & numbness; Progressive muscle weakness, lower>upper limbs; Muscle cramps; Frequent falls; Limbs spasticity, lower>upper; Abnormal gait, spastic; Imbalance; Dysphagia; Mild scoliosis; Coronary artery stenosis; Brain MRI: Encephalomalacia with surrounding gliosis in Rt. parietal lobe; EMG-NCV: suggestive of active motor neuron disease.	Motor Neuron Disease	NEK1	Missense	Novel	Chr4:170429443A>T	Heterozygote	NM_012224.4	c.1705T>A	p.Phe569Ile	Short-rib thoracic dysplasia 6 with or without polydactyly [#MIM: 263520], AR, DR; {Amyotrophic lateral sclerosis, susceptibility to, 24} [#MIM: 617892], AD	Autosoaml Dominant	VUS	PM2-PP3	Not checked	VUS	___	2022-08-20	No	___	___
Case266	101140	Hereditary Neuropathy	Solo	whole exome sequencing	No	Negative	Female	5 Y	Childhood	Childhood	Onset at the age of 1.5-year old with delayed walking; Difficulty walking, running & climbing steps; Frequent falls; Abnormal gait, imbalance; Muscle weakness & wasting, distal>proximal, lower>upper limbs; Thenar & hypothenar atrophy; Hands tremor; Claw fingers/toes; Pes cavus, bilateral; Deformed ankles; EMG-NCV: distal symmetrical polyneuropathy, axonal & demyelinating, mixed sensory & motor.	Neuropathies	SPG11	Missense	Novel	Chr15:44887477C>T	Homozygote	NM_025137.4	c.4615G>A	p.Gly1539Ser	Amyotrophic lateral sclerosis 5, juvenile [#MIM:602099]/AR; Charcot-Marie-Tooth disease, axonal, type 2X [#MIM:616668]/AR; Spastic paraplegia 11, autosomal recessive [#MIM: 604360]/AR	Autosomal Recessive	VUS	PM2	Not checked	VUS	___	2022-08-30	No	___	___
Case267	101189	Metabolic myopathy	Solo	whole exome sequencing	No	Negative	Female	30 Y	Adulthood	Adulthood	Onset at the age of 22-year old with morning stiffness; Generalized muscle weakness, mainly episodic attacks with head drop; Difficulty walking, running, climbing steps; Muscle cramps; Respiratory problem, dyspnea; Dysphagia; Weight loss; EMG-NCV: chronic myogenic changes; Bone density test: osteopenia; Muscle biopsy: suggestive of inflammatory myopathy like necrotizing autoimmune myopathy.	Myopathies	ETFDH	Missense	Known	Chr4:159624588T>C	Homozygote	NM_004453.4	c.1130T>C	p.Leu377Pro	Glutaric acidemia IIC [#MIM:231680]/ AR	Autosomal Recessive	Likely Pathogenic	PM1, PM2, PP3, PP5	Not checked	Positive	___	2022-08-18	No	___	___
Case268	101236	CMT	Solo	whole exome sequencing	Yes	Positive	Male	52 Y	Adulthood	Childhood	Onset at the age of 8-year old with feet weakness; Difficulty running & climbing steps; Muscle weakness, distal > proximal, lower > upper limbs; Muscle wasting, atrophy of thenar & hypothenar; Speech problem; Swallowing & chewing difficulty; Claw finger/toe deformity; Pes cavus, bilateral; Wheelchair bound since 45-year old; EMG-NCV: chronic axonal sensorimotor polyneuropathy.	Myopathies	PNPLA8	Splicing	Novel	Chr7:108154879C>T	Homozygote	NM_015723.5	c.1056+1G>A	___	?Mitochondrial myopathy with lactic acidosis [#MIM:251950}, AR	Autosomal Recessive	Likely Pathogenic	PVS1_strong,PM2	Not checked	Positive	___	2022-01-09	No	___	___
Case269	101296	Myopathy	Solo	whole exome sequencing	Yes	Negative	Male	31 Y	Adulthood	Adulthood	Age of onset 21-year old with weight loss & digestive manifestations including malnutrition, malabsorption, vomiting, and chronic abdominal pain, suspicious of Crohn disease; Facial weakness; Ophthalmoplegia; Progressive proximal & distal muscle weakness & wasting; Pes cavus; Feet drop; Areflexia; Impaired walking, Imbalance; EMG-NCV: chronic demyelinating sensorimotor polyneuropathy.	Overlapping	TYMP	Stop gain	Novel	Chr22:50967747G>A	Homozygote	NM_001953.5	c.235C>T	p.Arg79Ter	Mitochondrial DNA depletion syndrome 1 (MNGIE type); #MIM603041, AR	Autosomal Recessive	Pathogenic	(PM2, PVS1, PP5, PP4)	Inherited	Positive	___	2022-08-09	No	___	___
Case270	101384	CMT	Solo	whole exome sequencing	No	Negative	Male	21 Y	Adulthood	Childhood	Onset at the age of 5-year old with distal limbs weakness; Proximal & distal muscle weakness, upper & lower limbs; Intrinsic hand muscle atrophy; Waddling gait; Wheelchair bound since 15-year old; Intermittent myotonia of lips & chin; EMG suggestive of chronic axonal Sensorimotor polyneuropathy; Slightly elevated CPK.	Negative	___	___	___	___	___	___	___	___	___	Sporadic	___	___	___	Negative	___	2022-08-30	Whole exome sequencing of this patient was previously performed in Medical Genetic laboratory Dr.Bonyadi and no mutation relevant to the disease was identified. Also, Genetic analysis for exons VII and VIII in SMN1 gene was previously performed in Medical Genetic laboratory Dr.Bonyadi and revealed no deletion in this patient.	___	___
Case271	101476	Muscular dystrophy	Solo	whole exome sequencing	No	Negative	Female	13 Y	Childhood	Childhood	Difficulty rising from seated position & climbing steps; Muscle weakness & cramps; Elevated level of CPK, Aldolase & LDH; Elevated ALT & AST; Microcytic, hypochromic anemia; EMG-NCV: compatible with myopathic process with denervating feature; Muscle biopsy: compatible with muscular dystrophy.	Negative	___	___	___	___	___	___	___	___	___	Sporadic	___	___	___	Negative	___	2022-09-22	No	___	___
Case272	101491	Hereditary paraplagia	Solo	whole exome sequencing	No	Negative	Female	29 Y	Adulthood	Adulthood	Onset at the age of 27-year old; Limbs weakness, lower>upper; Increased muscle tone; Fasciculations, limbs & trunk; Involuntary jerking movements, finger; Tremor; Paresthesia, lower limbs & hands, transient.	Negative	___	___	___	___	___	___	___	___	___	Sporadic	___	___	___	Negative	___	2022-01-09	No	___	___
Case273	101501	CMT	Solo	whole exome sequencing	Yes	Negative	Male	20 Y	Adulthood	Childhood	Onset at the age of 16-year old with foot drop & lower limbs neuropathy; Distal lower & upper muscle weakness due to neuropathy; Impaired toe-walking ability; Abnormal gait; Mild pes cavus; EMG-NCV: chronic axonal polyneuropathy, sensory>motor.	Overlapping	SETX	Missense	Novel	Chr9:135150805G>A	Homozygote	NM_015046.7	c.6938C>T	p.Ser2313Leu	Amyotrophic lateral sclerosis 4, juvenile [#MIM:602433]/ AD; Spinocerebellar ataxia, autosomal recessive, with axonal neuropathy 2 [#MIM:606002]/ AR	Autosomal Recessive	VUS	___	Inherited	VUS	___	2022-04-09	No	___	___
Case274	101637	LGMD	Solo	whole exome sequencing	Yes	Negative	Female	13 Y	Childhood	Childhood	Proximal lower muscle weakness from 3-year ago which extended to upper muscle; Waddling gait; Lordosis; Inability to walk on heels, foot drop; Difficulty climbing steps; Elevated level of CPK & Aldolase; Slightly elevated SGOT & SGPT; EMG-NCV: chronic non-irritable myopathy; Muscle biopsy: suggestive of progressive Duchenne muscular dystrophy.	Dystrophies	CAPN3	Frameshift	Novel	Chr15:42680018TG>T	Homozygote	NM_000070.3	c.568delG	p.Val190Phefs*30	Muscular dystrophy, limb-girdle, autosomal dominant 4 [#MIM:618129]/AD; Muscular dystrophy, limb-girdle, autosomal recessive 1 [#MIM:253600]/AR	Autosomal Recessive	Likely Pathogenic	PVS1,PM2	Not checked	Positive	___	2022-12-09	No	___	___
Case275	101681	CMS	Solo	whole exome sequencing	Yes	Positive	Male	27 Y	Adulthood	Adulthood	Onset at the age of 22-23 years with lower limbs muscle weakness, extended to upper limbs; Difficulty climbing steps; Mild facial weakness; Pes cavus; Lordosis; Positive Gowers sign; Difficulty walking on heels since last year; Neuropathy, hands > feet; EMG-NCV: myopathic pattern.	Myopathies	MYPN	Frameshift	Novel	Chr10:69935117CCTCAACCAGTG>C	Homozygote	NM_032578.4	c.2603_2613delCTCAACCAGTG	p.Pro868Glnfs*2	Cardiomyopathy, dilated, 1KK [#MIM: 615248]/AD; Cardiomyopathy, familial restrictive, 4 [#MIM: 615248]/AD; Cardiomyopathy, hypertrophic, 22 [#MIM: 615248]/AD; Nemaline myopathy 11, autosomal recessive [#MIM: 617336]/AR	Autosomal Recessive	Likely Pathogenic	PM2/PVS1-Strong/PM1?	Not checked	Positive	___	2022-09-22	No	___	___
Case276	101707	Motor neuron disease	Solo	whole exome sequencing	No	Negative	Female	58 Y	Adulthood	Adulthood	Onset at the age of 58-year old with hand weakness; Hand & feet paresthesia, Lt. > Rt. hand; Twitching & fasciculations, hands; Fatigue; EMG-NCV: chronic focal motor neuron disease.	Motor Neuron Disease	SOD1	Frameshift	Novel	Chr21:33040863CT>C	Heterozygote	NM_000454.5	c.439delT	p.Cys147Valfs*3	Amyotrophic lateral sclerosis 1 [#MIM: 105400] AD, AR; Spastic tetraplegia and axial hypotonia, progressive [#MIM:618598], AR	Autosoaml Dominant	Likely Pathogenic	Not Provided	Not checked	Positive	___	2022-09-13	No	___	___
Case277	101758	Anterior horn cell disease	Solo	whole exome sequencing	Yes	Negative	Male	21 Y	Adulthood	Adulthood	Blurred vision & sensorineural hearing impairment from 2-year ago; Facial muscle weakness; Bulbar palsy, dysphagia; Nocturnal hypoventilation; Ataxia; Abnormal gait from last year; Neuropathy; Muscle weakness, lower>upper; Muscle cramps; Fasciculations; Mildly elevated CPK; EMG-NCV: compatible with anterior horn cell disease.	Negative	___	___	___	___	___	___	___	___	___	Sporadic	___	___	___	Negative	___	2022-09-19	No	___	___
Case278	101869	Myopathy	Solo	whole exome sequencing	No	Negative	Female	46 Y	Adulthood	Adulthood	Onset at the age of 35-year old with progressive muscle weakness; Proximal muscle weakness, lower>upper, Rt. > Lt. hand; EMG-NCV: non-irritable myopathic pattern; Slightly elevated CPK; Muscle biopsy: suggestive of late phase of dystrophy; Pompe disease is unlikely based on lysosomal enzyme activity assay.	Negative	___	___	___	___	___	___	___	___	___	Sporadic	___	___	___	Negative	___	2022-09-20	No	___	___
Case279	101880	SMA	Solo	whole exome sequencing	Yes	Negative	Male	17 Y	Childhood	Childhood	Onset: 15-16 years old; Difficulty running; Hypoesthesia; Paresthesia; Postural instability; Distal muscle weakness, upper & lower; Foot dorsiflexor weakness; Hyperreflexia; Clonus; Pes cavus; EMG-NCV: mostly consistent with distal motor neuron disease and pure motor neuropathy/neuronopathy.Above clinical information is based on HPO nomenclature.	Negative	___	___	___	___	___	___	___	___	___	Sporadic	___	___	___	Negative	___	2022-11-24	No	___	___
Case280	101890	LGMD	Solo	whole exome sequencing	Yes	Negative	Female	22 Y	Adulthood	Childhood	Onset at the age of 12-year old with tip-toe walking, frequent falls & difficulty running; Scapular winging; Proximal upper & lower muscle weakness; Pes cavus; Abnormal gait, waddling gait; EMG-NCV: myopathic pattern, LGMD; Elevated CPK; Muscle biopsy: muscle dystrophy.	Dystrophies	CAPN3	Missense	Novel	Chr15:42693932C>A	Homozygote	NM_000070.3	c.1448C>A	p.Ala483Asp	Muscular dystrophy, limb-girdle, autosomal dominant 4 [#MIM: 618129]/AD; Muscular dystrophy, limb-girdle, autosomal recessive 1 [#MIM: 253600]/AR	Autosomal Recessive	Likely Pathogenic	PM1?-PM2-PP3-PP5?	Not checked	Positive	___	2022-09-19	No	___	___
Case281	101929	Muscular dystrophy	Solo	whole exome sequencing	Yes	Negative	Male	27 Y	Adulthood	Adulthood	Weakness at age of 19 years; Progressive muscle weakness, lower & upper limbs, proximal>distal; Difficulty running; Waddling gait; EMG-NCV: in favor of myopathic process; Elevated level of CPK, LDH & Aldolase; Increased level of AST & ALT; Muscle MRI revealed fatty degeneration and muscular atrophy of thighs & legs; Muscle biopsy: suggestive of muscular dystrophy.	Dystrophies	CAPN3	Missense	Known	Chr15:42679985T>C	Heterozygote	NM_000070.3	c.533T>C	p.Ile178Thr	Muscular dystrophy, limb-girdle, autosomal dominant 4 [#MIM:618129]/AD; Muscular dystrophy, limb-girdle, autosomal recessive 1 [#MIM:253600]/AR	Autosoaml Dominant	Likely Pathogenic	PM1,PM2,PP3,PP5	Not checked	Positive	PMID: 22443334, 17526799, 18854869, 16141003	2022-10-22	Multiplex Ligation Dependent Probe Amplification (MLPA) screening for deletions and duplications in Dystrophin gene was previously performed in this laboratory for this individual which revealed no Del/Dup in this patient.	___	___
Case282	102104	SMA	Solo	whole exome sequencing	Yes	Positive	Male	19 Y	Adulthood	Childhood	Muscle spasm, since 7-year old; Muscle weakness, since 14-year old; Proximal muscle weakness, lower>upper; Gowers sign; Foot dorsiflexor weakness; EMG-NCV: Chronic motor polyneuropathy or neuronopathy; Elevated CPK. Above clinical information is based on HPO nomenclature.	Negative	___	___	___	___	___	___	___	___	___	Familial	___	___	___	Negative	___	2022-11-13	Multiplex Ligation Dependent Probe Amplification (MLPA) screening for deletions and duplications in exons 7 & 8 in SMN1 gene was previously performed in this laboratory for this individual which revealed no Del/Dup in this patient.	___	___
Case283	102157	Myopathy	Solo	whole exome sequencing	No	Negative	Female	51 Y	Adulthood	Adulthood	Onset at the age of 46-year with Ataxia & Diplopia; Mild neuropathy; Mild lower muscle weakness; Muscle wasting; Positive Gowers sign, mild; EMG-NCV: mild non irritable-myopathic pattern; Brain MRI: corpus callosum.	Negative	___	___	___	___	___	___	___	___	___	Sporadic	___	___	___	Negative	___	2022-01-10	No	___	___
Case284	102224	Muscular dystrophy	Solo	whole exome sequencing	Yes	Positive	Female	18 Y	Adulthood	Childhood	Consanguineous parents, two siblings patients ,age of onset 10 years, proximal lower muscle weakness and atrophy, positive Gower’s sign, frequent falling , climbing and walking difficulty, lordosis, scapula winging and elevated CPK.	Dystrophies	CAPN3	Splicing	Novel	Chr15:42703200T>G	Homozygote	NM_000070.3	c.2380+2T>G	___	Muscular dystrophy, limb-girdle, autosomal dominant 4 [#MIM 618129]/AD Muscular dystrophy, limb-girdle, autosomal recessive 1[#MIM 253600]/AR	Autosomal Recessive	Pathogenic	PM3,PVS1,PM2,PP5	Not checked	Positive	___	2023-09-12	The MLPA analysis for this individual did not reveal any deletion or duplication in DMD gene.	___	SCV001755391
Case285	102257	Myopathy	Solo	whole exome sequencing	Yes	Positive	Female	50 Y	Adulthood	Adulthood	consanguineous parents and one affected sister ,Age of onset :35 years old ,Proximal lower muscle weakness, waddling gait, proximal upper muscle weakness , atrophic changes with core like cytoplasmic lesions and no rimmed vacuole ,type 2 fiber predominance and no fiber type grouping in muscle biopsy , sarcolemmal labelling for dystrophin, dysferlin and sarcoglycans in IHC report, fatty replacemen…	Dystrophies	TTN	Splicing	Novel	Chr2:179462547C>A	Heterozygote	NM_001267550.2	c.57263-1G>T	___	Cardiomyopathy, dilated, 1G [#MIM:604145],AD; Cardiomyopathy, familial hypertrophic, 9 [#MIM:613765] ,AD;Muscular dystrophy, limb-girdle, autosomal recessive 10 [#MIM: 608807],AR; Myopathy, myofibrillar, 9, with early respiratory failure [#MIM:603689],AD; Salih myopathy[#MIM:611705],AR; Tibial muscular dystrophy, Tardive [#MIM: 600334], AD.	Autosoaml Dominant	Likely Pathogenic	PVS1,PM2	Not checked	Positive	___	2022-10-15	No	___	___
Case286	102283	CMS	Solo	whole exome sequencing	Yes	Positive	Male	10 Y	Childhood	Childhood	Motor delay; Generalized muscle weakness; Myopathic facies; Ptosis; Gait disturbance; Gowers sign; Febrile seizure; Muscle biopsy: muscular dystrophy; Positive repetitive nerve stimulation (RNS) finding; EMG-NCV: compatible with myopathic pattern. Above clinical information is based on HPO nomenclature.	Myopathies	DES	Frameshift	Novel	Chr2:220286071CT>C	Homozygote	NM_001927.4	c.1034delT	p.Leu345Argfs*2	Myopathy, myofibrillar, 1 [#MIM:601419]/AD, AR; Scapuloperoneal syndrome, neurogenic, Kaeser type [#MIM:181400]/AD; Cardiomyopathy, dilated, 1I [#MIM:604765]/AD	Autosomal Recessive	Likely Pathogenic	PVS1, PM2	Inherited	Positive	___	2022-10-11	No	___	___
Case287	102305	CMT	Solo	whole exome sequencing	Yes	Negative	Male	12 Y	Childhood	Childhood	Consanguineous parents. Upper and lower muscle weakness (neuropathy), gait abnormality, delayed walking, axonal sensory motor polyneuropathy (HSMN) reported in NCV.	Neuropathies	MPZ	Splicing	Novel	Chr1:161277219A>C	Homozygote	NM_000530.8	c.68-5T>G	___	Charcot-Marie-Tooth disease, dominant intermediate D [MIM#607791] AD; Charcot-Marie-Tooth disease, type 1B [MIM#118200] AD; Charcot-Marie-Tooth disease, type 2I [MIM#607677] AD; Charcot-Marie-Tooth disease, type 2J [MIM# 607736] AD; Dejerine-Sottas disease [MIM#145900] AD, AR; Hypomyelinating neuropathy, congenital, 2 [MIM#618184] AD; Roussy-Levy syndrome [MIM#180800] AD	Autosomal Recessive	VUS	___	Not checked	VUS	___	2022-09-29	No	___	___
Case288	102379	Hereditary Neuropathy	Solo	whole exome sequencing	Yes	Negative	Female	4 Y	Childhood	Childhood	Onset at the age of 15-month with frequent falls; Abnormal gait; Lower muscle weakness; Elevated CPK; EMG-NCV with inconsistent results including mild myopathy in proximal upper limbs, chronic anterior horn disease in lower limbs, and proximal & distal sensorimotor peripheral polyneuropathy.	Negative	___	___	___	___	___	___	___	___	___	Sporadic	___	___	___	Negative	___	2022-10-16	No	___	___
Case289	102388	Hereditary ataxia	Solo	whole exome sequencing	Yes	Negative	Female	44 Y	Adulthood	Not reported	Onset age: 29-year old; Unilateral lower limb neuropathy; Muscle cramps; Paresthesia (bilateral stocks); Strabismus, unilateral; Ptosis, unilateral; Dysarthria; Steppage gait; Ataxia; Cerebellar signs. Consanguineous parents.	Negative	___	___	___	___	___	___	___	___	___	Sporadic	___	___	___	Negative	___	2023-12-11	Investigation of GAA repeats of frataxin gene using Triplet Primed (TP) PCR analysis in this center, revealed normal allele size for this individual	___	___
Case290	102708	CMT	Solo	whole exome sequencing	Yes	Negative	Female	27 Y	Adulthood	Adulthood	Sporadic case, consanguineous marriage, age of onset 20 years, distal lower and upper muscle weakness, pes cavus, thenar,hypothenar muscle atrophy.	Neuropathies	LRSAM1	Missense	Novel	Chr9:130245258C>A	Heterozygote	NM_138361.5	c.1118C>A	p.Thr373Asn	Charcot-Marie-Tooth disease, axonal, type 2P [#MIM:614436],AD,AR	Autosoaml Dominant	VUS	PM2	Inherited	VUS	___	2022-10-22	No	___	___
Case291	102732	LGMD	Solo	whole exome sequencing	Yes	Positive	Male	28 Y	Adulthood	Childhood	Onset at age 15 years with proximal lower muscle weakness & gait abnormality; Upper & lower muscle weakness, proximal; Progressive girdle muscle weakness; Mild muscle atrophy; Lordosis; Elevated CPK; Muscle biopsy: myopathic atrophy, mild fibrosis and fat replacement associated with necrosis/regeneration; EMG-NCV: myopathic pattern, non-irritable.	Overlapping	DYSF	Missense	Novel	Chr2:71797464G>A	Homozygote	NM_003494.4	c.3031G>A	p.Gly1011Ser	Miyoshi muscular dystrophy 1 [#MIM:254130]/AR; Muscular dystrophy, limb-girdle, autosomal recessive 2 [#MIM:253601]/AR; Myopathy, distal, with anterior tibial onset [#MIM:606768]/AR	Autosomal Recessive	VUS	PP3-PM2	Inherited	VUS	___	2022-05-11	No	___	___
Case292	102740	Lipid Storage Disease (LSD)	Solo	whole exome sequencing	Yes	Negative	Female	23 Y	Adulthood	Adulthood	Age of onset 20 years, consanguineous parents, progressive facial and limb muscle weakness, hypotonia, unstable gait, poor head control ( neck muscle weakness and pain), dysphagia, myopathy reported in EMG , normal endoscopy, CPK:1519U/L, LDH,1928U/L, SGOT:101U/L,SGOT147U/L, Mild TR reported in echocardiography.	Myopathies	ETFDH	Missense	Novel	Chr4:159618721T>C	Homozygote	NM_004453.4	c.842T>C	p.Ile281Thr	Glutaric acidemia IIC [#MIM:231680], AR	Autosomal Recessive	VUS	PM2-PP3	Not checked	VUS	___	2022-10-20	No	___	___
Case293	102768	ALS	Solo	whole exome sequencing	Yes	Negative	Female	35 Y	Adulthood	Adulthood	Age of onset 34 years, frequent falling, generalized muscle weakness,muscle atrophy, paraparesis, dysarthria.	Negative	___	___	___	___	___	___	___	___	___	Sporadic	___	___	___	Negative	___	2022-10-29	No	___	___
Case294	102875	Hereditary Neuropathy	Solo	whole exome sequencing	Yes	Negative	Male	41 Y	Adulthood	Not reported	Low back pain; Pes cavus; EMG-NC: mild involvement of some nerves with no evidence of definite polyneuropathy.	Negative	___	___	___	___	___	___	___	___	___	Sporadic	___	___	___	Negative	___	2022-11-10	No	___	___
Case295	102894	Hereditary Neuropathy	Solo	whole exome sequencing	Yes	Negative	Male	32 Y	Adulthood	Childhood	Onset at age 3-4 years with difficulty walking; Lower limbs, distal neuropathy at age of 22 years; Upper limbs neuropathy at age of 30 years; Imbalance while running; Abnormal gait; Hammertoe; Pes cavus; EMG-NCV in favor of a chronic length-dependent sensorimotor axonal polyneuropathy.	Hereditary Ataxia	SACS	Missense	Novel	Chr13:23907118A>C	Homozygote	NM_014363.6	c.10897T>G	p.Phe3633Val	Spastic ataxia, Charlevoix-Saguenay type [#MIM:270550]/AR	Autosomal Recessive	VUS	PM2-PP3?	Inherited	VUS	___	2022-10-31	No	___	___
Case296	102942	Motor neuron disease	Solo	whole exome sequencing	Yes	Negative	Male	21 Y	Adulthood	Childhood	Onset: 14-year old; Mild neuropathy of hands & feet; Distal lower & upper muscle weakness due to neuropathy; Pes cavus; EMG-NCV: in favor of active motor neuron disorders; Elevated CPK; Brain MRI: mild senile global cortical atrophy and moderate to severe generalized cerebellar atrophy.	Hereditary Ataxia	SYNE1	Stop gain	Novel	Chr6:152497558C>T	Homozygote	NM_182961.4	c.23598G>A	p.Trp7866*	Spinocerebellar ataxia, autosomal recessive 8 [#MIM:610743]/AR; Arthrogryposis multiplex congenita 3, myogenic type [#MIM:618484]/AR; Emery-Dreifuss muscular dystrophy 4, autosomal dominant [#MIM:612998]/AD	Autosomal Recessive	Likely Pathogenic	PVS1, PM2	Inherited	Positive	___	2022-11-19	No	___	___
Case297	103013	Hereditary Neuropathy	Solo	whole exome sequencing	No	Negative	Female	10 Y	Childhood	Childhood	Onset at age 2 years with gait abnormality; Distal lower & upper muscle weakness & atrophy due to neuropathy; Steppage gait; Impaired tip-toe and heel walking; EMG-NCV: suggestive of chronic motor polyneuropathy.	Overlapping	BSCL2	Missense	Novel	Chr11:62469966A>C	Heterozygote	NM_001122955.4	c.460T>G	p.Ser154Ala	Encephalopathy, progressive, with or without lipodystrophy [#MIM:615924]/AR; Lipodystrophy, congenital generalized, type 2 [#MIM:269700]/AR; Neuropathy, distal hereditary motor, type VC [#MIM:619112]/AD; Silver spastic paraplegia syndrome [#MIM:270685]/AD	Autosoaml Dominant	VUS	PM2/PM5	De novo	VUS	___	2022-10-22	No	___	___
Case298	103098	CMT	Solo	whole exome sequencing	Yes	Negative	Male	25 Y	Adulthood	Childhood	Onset age: 6-year old; Hearing loss, from 10-year ago; Difficulty walking; Abnormal gait; Footdrop; Hands & feet deformity; Upper & lower limbs weakness & atrophy due to neuropathy; Decreased muscle force; EMG-NCV: suggestive of CMT1 & Hereditary motor sensory neuropathy.	Neuropathies	SBF2	Splicing	Novel	Chr11:9985431T>C	Homozygote	NM_030962.4	c.1601-2A>G	___	Charcot-Marie-Tooth disease, type 4B2 [#MIM 604563]/AR	Autosomal Recessive	Likely Pathogenic	PVS1-very strong, PM2	Not checked	Positive	___	2023-02-26	No	___	___
Case299	103148	Hereditary paraplagia	Solo	whole exome sequencing	No	Negative	Male	32 Y	Adulthood	Adulthood	Onset: 25-year old; consanguineous parents ,spastic gait, upper and lower muscle weakness, mild lower muscle atrophy, mild pes cavus, normal EMG/NCV with mild neurogenic process, normal CPK, normal cervical, thoracic MRI	Hereditary Ataxia	ANO10	Missense	Novel	Chr3:43618184C>T	Homozygote	NM_018075.5	c.1162G>A	p.Glu388Lys	Spinocerebellar ataxia, autosomal recessive 10 [#MIM:613728], AR	Autosomal Recessive	VUS	PM2, PP3	Inherited	VUS	___	2022-11-29	No	___	___
Case300	103207	CMT	Solo	whole exome sequencing	No	Negative	Female	23 Y	Adulthood	Childhood	Age of onset 6 years old with frequent falls; Distal lower & upper muscle weakness due to neuropathy; Difficulty climbing steps; Pes cavus; Mild claw hand; Lordosis; Decreased DTR; Positive Hx. of seizure.	Neuropathies	GDAP1	Missense	Novel	Chr8:75272408T>G	Homozygote	NM_018972.4	c.347T>G	p.Met116Arg	Charcot-Marie-Tooth disease, axonal, type 2K; #MIM607831/AD,AR Charcot-Marie-Tooth disease, axonal, with vocal cord paresis; #MIM607706/ AR Charcot-Marie-Tooth disease, recessive intermediate, A; #MIM608340/AR Charcot-Marie-Tooth disease, type 4A; #MIM214400/AR	Autosomal Recessive	Likely Pathogenic	PM2, PM1, PP3, PP5	Not checked	Positive	___	2022-04-10	No	___	SCV001755211
Case301	103277	Mitochondrial myopathy	Solo	whole exome sequencing	Yes	Positive	Male	38 Y	Adulthood	Adulthood	Age of onset 18 years old with bilateral ptosis; External ophtalmoplegia; Poor vision; Facial muscle weakness; Mild lower & upper limbs muscle weakness; Exercise intolerance; Generalized neuropathy; Pes cavus; Hair loss & Alopecia; itchy-Rash; Elevated level of CPK; EMG: Non-irritable myopathy; Muscle biopsy compatible with mitochondrial myopathy; Positive Hx. of Lichen Planus.	Overlapping	MGME1	Stop gain	Known	Chr20:17950958G>A	Homozygote	NM_052865.4	c.456G>A	p.Trp152Ter	Mitochondrial DNA depletion syndrome 11; #MIM615084/AR	Autosomal Recessive	Pathogenic	PM2, PVS1, PP5	Not checked	Positive	PMID: 233113956	2022-02-11	No	___	___
Case302	103322	Metabolic myopathy	Solo	whole exome sequencing	Yes	Negative	Female	40 Y	Adulthood	Adulthood	Onset at age of 32 years with Difficulty running & Lower limb muscle weakness; Calf muscle pseudohypertrophy; Fasciculations; Gowers sign; Hypoesthesia; Paresthesia; EMG-NCV: irritable myopathy; Elevated CPK & LDH. Above clinical information is based on HPO nomenclature.	Myopathies	PNPLA2	Frameshift	Novel	Chr11:822523C>CC	Homozygote	NM_020376.4	c.613dupC	p.Leu205Profs*102	Neutral lipid storage disease with myopathy [#MIM:610717], AR	Autosomal Recessive	Pathogenic	PVS1-PM2-PP5	Not checked	Positive	___	2022-09-11	No	___	___
Case303	103420	Myopathy	Solo	whole exome sequencing	No	Negative	Male	15 Y	Childhood	Childhood	Onset: 6-year; Frequent falls; Difficulty climbing stairs; Gowers sign; Waddling gait; Precocious puberty; Muscle weakness, Proximal > Distal in lower limbs; Proximal muscle weakness in Lt. upper limb; Calf muscle pseudohypertrophy; EMG-NCV: myopathic process with myotonia and spontaneous activity; Elevated SGOT, SGPT & LDH; Muscle biopsy: myopathic atrophy, necrosis and regeneration and focus of…	Negative	___	___	___	___	___	___	___	___	___	Sporadic	___	___	___	Negative	___	2022-11-21	No	___	___
Case304	103495	Cerebellar atrophy	Solo	whole exome sequencing	No	Positive	Male	61 Y	Adulthood	Adulthood	Onset: 55-56 years old; Gait ataxia; Cerebellar atrophy; Dysarthria; Impaired tandem gait; Hx. of ype I diabetes mellitus since 15-year ago.Above clinical information is based on HPO nomenclature.	Hereditary Paraplegia	VAMP1	Stop gain	Novel	Chr12:6575423G>A	Heterozygote	NM_014231.5	c.97C>T	p.Arg33*	Spastic ataxia 1, autosomal dominant[#MIM: 108600]/AD Myasthenic syndrome, congenital, 25 [#MIM:618323]/AR	Autosoaml Dominant	Likely Pathogenic	PVS1-PM2	Not checked	Positive	___	2022-01-12	No	___	___
Case305	103569	CMT	Solo	whole exome sequencing	Yes	Negative	Male	19 Y	Adulthood	Not reported	Distal lower muscle weakness, excercise fatigability, muscle cramp, hand tremor, muscle fasciculation, gait abnormality due to muscle weakness, EMG suspected SMA, normal brain MRI	Negative	___	___	___	___	___	___	___	___	___	Sporadic	___	___	___	Negative	___	2022-11-27	No	___	___
Case306	103571	CMS	Solo	whole exome sequencing	Yes	Positive	Female	18 Y	Adulthood	Childhood	Bilateral ptosis since childhood. Above clinical information is based on HPO nomenclature.	Neuromuscular junction disorders	CHRNE	Missense	Novel	Chr17:4805326C>T	Homozygote	NM_000080.4	c.401G>A	p.Gly134Asp	Myasthenic syndrome, congenital, 4A, slow-channel [#MIM: 605809]/AD, AR; Myasthenic syndrome, congenital, 4B, fast-channel [#MIM:616324]/AR; Myasthenic syndrome, congenital, 4C, associated with acetylcholine receptor deficiency [#MIM:608931]/AR	Autosomal Recessive	VUS	PP3-PM2	Not checked	VUS	___	2022-11-17	No	___	___
Case307	103663	CMT	Solo	whole exome sequencing	Yes	Positive	Female	32 Y	Adulthood	Childhood	Consanguineous parents, age of onset 6 years, muscle weakness and atrophy, ataxia, achilles tendon release, sensory motor demyelinating polyneuropathy reported in EMG/NCV.	Neuropathies	SH3TC2	Stop gain	Known	Chr5:148407200G>A	Homozygote	NM_024577.4	c.2095C>T	p.Gln699*	Charcot-Marie-Tooth disease, type 4C [#MIM:601596], AR; Mononeuropathy of the median nerve, mild [#MIM:613353], AD	Autosomal Recessive	Pathogenic	PVS1, PM2, PP5	Not checked	Positive	PMID:32376792	2022-06-12	No	___	___
Case308	103908	Mitochondrial myopathy	Solo	whole exome sequencing	Yes	Negative	Male	15 Y	Childhood	Childhood	Onset at age of 9 years with bilateral ptosis; Muscle weakness, lower & upper limbs, proximal>distal; Muscle atrophy; Ataxic gait; EMG/NCV showed chronic myopathic pattern, additionally evidence of axonal sensorimotor polyneuropathy was detected; Muscle biopsy was suggestive of mitochondrial myopathy.	Overlapping	POLG	Missense	Known	Chr15:89872286A>C	Homozygote	NM_002693.3	c.911T>G	p.Leu304Arg	Mitochondrial DNA depletion syndrome 4A (Alpers type); #MIM203700/AR Mitochondrial DNA depletion syndrome 4B (MNGIE type); #MIM 613662/AR Mitochondrial recessive ataxia syndrome (includes SANDO and SCAE); #MIM607459/AR Progressive external ophthalmoplegia, autosomal dominant 1; #MIM157640/AD Progressive external ophthalmoplegia, autosomal recessive 1; #MIM258450/AR	Autosomal Recessive	Pathogenic	PM2, PM1, PP3, PP5, PS1, PS3	Not checked	Positive	PMID: 11431686, 16639411, 21880868, 22006280, 24288107	2022-10-30	No	___	SCV001755354
Case309	104061	CMT	Solo	whole exome sequencing	Yes	Negative	Female	3 Y	Childhood	Childhood	Consanguineous parents, sporadic case, age 3 years, distal muscle weakness, walking imapairment, normal intelligence , neuropathy reported in EMG/NCV.	Neuropathies	PRX	Stop gain	Known	Chr19:40903169G>A	Homozygote	NM_181882.3	c.1090C>T	p.Arg364*	Charcot-Marie-Tooth disease, type 4F [#MIM:614895]/ AR; Dejerine-Sottas disease [#MIM:145900]/ AD, AR	Autosomal Recessive	Pathogenic	PVS1 PM2 PM3	Inherited	Positive	PMID: 21741241, 30724636	2023-10-16	Multiplex Ligation Dependent Probe Amplification (MLPA) screening for deletions and duplications in CMT/HNPP region was previously performed in this laboratory for this individual and revealed no Del/Dup in PMP22 gene of this individual.	___	SCV001167082
Case310	104167	Hereditary Neuropathy	Solo	whole exome sequencing	Yes	Positive	Male	38 Y	Adulthood	Adulthood	Consanguineous parents, distal lower muscle weakness and atrophy, foot deformity, pes cavus, gait abnormality, distal hereditary motor neuropathy reported in EMG/NCV	Neuropathies	SORD	Frameshift	Known	Chr15:45361216CG>C	Homozygote	NM_003104.6	c.757delG	p.Ala253Glnfs*27	Sorbitol dehydrogenase deficiency with peripheral neuropathy [#MIM:618912]/ AR	Autosomal Recessive	Pathogenic	Not Provided	Not checked	Positive	PMID: 33875678, PMID: 33397963,PMID: 33381078 and PMID: 32367058PMID: 33397963;PMID: 32367058	2022-03-12	No	___	SCV001755401
Case311	104174	Muscular dystrophy	Solo	whole exome sequencing	Yes	Negative	Female	34 Y	Adulthood	Not reported	Consanguineous parents, age of onset 12 years, generalized muscle weakness, positive Gower's sign, elevated CPK and myopathic atrophy with necrosis and myophagocytosis with no fibrosis or inflammation reported in muscle biopsy, non-irritable myopathic process reported in EMG.	Negative	___	___	___	___	___	___	___	___	___	Sporadic	___	___	___	Negative	___	2022-12-31	Multiplex Ligation Dependent Probe Amplification (MLPA) screening for deletions and duplications in Dystrophin gene was previously performed in this laboratory for this individual which revealed no Del/Dup in this patient.	___	___
Case312	104190	CMT	Solo	whole exome sequencing	Yes	Negative	Male	43 Y	Adulthood	Childhood	Onset: 12-year old; upper & lower distal muscle weakness & atrophy due to neuropathy; Pes cavus; claw hand deformity; Abnormal gait; EMG-NCV: Sever symmetric sensory-motor axonal type peripheral polyneuropathy in upper & lower limbs, suggestive of CMT, type 2.	Neuropathies	MPV17	Splicing	Known	Chr2:27535123A>C	Homozygote	NM_002437.5	c.376-9T>G	___	Charcot-Marie-Tooth disease, axonal, type 2EE [#MIM:618400]/AR; Mitochondrial DNA depletion syndrome 6 (hepatocerebral type) [#MIM:256810]/AR	Autosomal Recessive	Likely Pathogenic	PP5_strong,PM2-PS3?	Inherited	Positive	PMID: 30298599	2022-08-12	No	___	___
Case313	104261	Congenital myotonia	Solo	whole exome sequencing	No	Positive	Female	21 Y	Adulthood	Childhood	Onset: infancy; Delayed ability to walk; Frequent falls; Eyelid myotonia; Muscle stiffness; Myalgia, aggravated by cold & menstruation; Tongue myotonia; EMG/NCV: myotonic disorder.	Myotonic syndrome	CLCN1	Synonymous	Known	Chr7:143020479G>A	Homozygote	NM_000083.3	c.774G>A	p.Glu258=	Myotonia congenita, dominant [#MIM:160800]/AD; Myotonia congenita, recessive [#MIM:255700]/AR; Myotonia levior, recessive	Autosomal Recessive	Likely Pathogenic	PM3-strongPP3-PM2	Not checked	Positive	___	2022-01-12	No	___	SCV000927074
Case314	104271	Hereditary Neuropathy	Solo	whole exome sequencing	No	Negative	Male	53 Y	Adulthood	Childhood	Sporadic case, age of onset 15 years, distal muscle weakness, pes cavus, neuropathy, pulmonary insufficiency, axonal HSMN reported in EMG/NCV, bronchiectasia, bilateral fibrotic changes, emphysema reported in chest CT scan, normal brain CT angiography, normal brain MRI( few small periventricular ischemic lesions).	Negative	___	___	___	___	___	___	___	___	___	Sporadic	___	___	___	Negative	___	2022-12-17	No	___	___
Case315	104313	Mitochondrial disease	Solo	whole exome sequencing	No	Negative	Male	18 Y	Adulthood	Childhood	Onset at age 12 years with bilateral ptosis, Lt.>Rt.; Progressive external ophthalmoplegia; Nasal speech; Urinary incontinency from 4 months ago; Ultrasonography: mild to moderate Varicocele, Lt.; Muscle biopsy: mitochondrial myopathy; SFEMG study: neuromuscular junction transmission disorder.	Overlapping	RYR1	Missense	Novel	Chr19:38993576C>A	Heterozygote	NM_000540.3	c.7892C>A	p.Pro2631His	Central core disease; #MIM117000/AD, AR, King-Denborough syndrome; #MIM619542/AD; Minicore myopathy with external ophthalmoplegia; #MIM255320/AR, Neuromuscular disease, congenital, with uniform type 1 fiber; #MIM117000/AD, AR {Malignant hyperthermia susceptibility 1}; #MIM145600/AD	Autosoaml Dominant	VUS	PM2, PP2, PP3	Not checked	VUS	___	2022-10-11	No	___	___
Case316	104450	Myopathy	Solo	whole exome sequencing	Yes	Negative	Female	40 Y	Adulthood	Adulthood	Onset:24 years old; Muscle weakness, lower>upper, proximal>distal; Exercise-induced muscle fatigue; Impaired toe-walking ability; difficulty climbing stairs; gowers sign; Ptosis, mild; palpitations, episodic; EMG: Moderate chronic myopathic process; muscle biopsy: myofibrillar myopathy; IHC study: sarcolemmal labelling with all examined antibodies.	Overlapping	LMNA	Missense	Novel	Chr1:156104275A>C	Heterozygote	NM_170707.4	c.595A>C	p.Thr199Pro	Cardiomyopathy, dilated, 1A [#MIM:115200]/AD; Charcot-Marie-Tooth disease, type 2B1 [#MIM:605588]/AR; Emery-Dreifuss muscular dystrophy 2, autosomal dominant [#MIM:181350]/AD; Emery-Dreifuss muscular dystrophy 3, autosomal recessive [#MIM:616516]/AR; Heart-hand syndrome, Slovenian type [#MIM:610140]/AD; Hutchinson-Gilford progeria [#MIM:176670]/AD; Lipodystrophy, familial partial, type 2 [#MIM:15…	Autosoaml Dominant	VUS	PP3-PM2	Not checked	VUS	___	2022-12-12	No	___	___
Case317	104481	Congenital myopathy	Solo	whole exome sequencing	Yes	Positive	Female	17 Y	Childhood	Childhood	Multiple affected individual, dominant pattern, slightly motor development delay in standing and walking, hypotonia, upper and lower muscle weakness, easy fatigability, flat foot, positive Gower‘s sign, left ankle dislocation ,congenital fiber type disproportion reported in muscle biopsy ,chronic myopathy process in EMG, normal echocardiography, low CPK	Myopathies	RYR1	Missense	Known	Chr19:39037155C>T	Heterozygote	NM_000540.3	c.12083C>T	p.Ser4028Leu	Central core disease [#MIM:117000] AD,AR; King-Denborough syndrome [#MIM:619542 ] AD; Minicore myopathy with external ophthalmoplegia [#MIM:255320 ]AR; Neuromuscular disease, congenital, with uniform type 1 fiber [#MIM:117000] AD,AR]; {Malignant hyperthermia susceptibility 1} [#MIM:145600 ] AD	Autosoaml Dominant	Likely Pathogenic	Not Provided	Inherited	Positive	PMID: 34535181, 32236737, 34809703, 33646171	2022-06-12	No	___	___
Case318	104535	CMT	Solo	whole exome sequencing	Yes	Positive	Female	31 Y	Adulthood	Not reported	Two affected individuals, distal upper and lower neuropathy, hearing impairment, pes cavus, myopia, decreased DTR, tongue fasciculation, axonal CMT reported in NCV.	Negative	___	___	___	___	___	___	___	___	___	Familial	___	___	___	Negative	___	2022-12-17	No	___	___
Case319	104554	CMT	Solo	whole exome sequencing	Yes	Positive	Female	29 Y	Adulthood	Childhood	Onset age: 10-year old; Distal lower muscle weakness due to neuropathy; Foot drop; Fasciculations; Inability to tip-toe and heel walk; Mild pes cavus; EMG-NCV: chronic demyelinating sensorimotor polyneuropathy.	Negative	___	___	___	___	___	___	___	___	___	Familial	___	___	___	Negative	___	2023-01-31	The MLPA analysis for this individual was previously performed in this center which revealed no duplication or deletion of a 1.5 Mb region on chromosome 17p11.2 (CMT/HNPP region) which means that the phenotype is not due to the PMP22 gene duplication or deletion.	___	___
Case320	104733	Hereditary ataxia	Solo	whole exome sequencing	Yes	Positive	Female	6 Y	Childhood	Childhood	Onset age: 4-5 month; Flat feet; Abnormal gait; Neuropathy, lower limbs; Spasticity, lower limbs; Ataxia; Feet deformity.	Hereditary Paraplegia	KIF5A	Splicing	Novel	Chr12:57965176A>G	Heterozygote	NM_004984.4	c.1362+4A>G	___	Myoclonus, intractable, neonatal [#MIM:617235]/AD; Spastic paraplegia 10, autosomal dominant [#MIM:604187]/AD; {Amyotrophic lateral sclerosis, susceptibility to, 25} [#MIM:617921]/AD	Autosoaml Dominant	VUS	PM2,PP3	Not segregated	VUS	___	2023-10-04	No	___	___
Case321	104797	Myotonia	Solo	whole exome sequencing	Yes	Negative	Male	5 Y	Childhood	Childhood	Consanguineous parents, sporadic case, age of onset neonatal, hypotonia, neurodevelopmental delay, proximal muscle weakness, open and fish like mouth, mild microcephaly (OFC: 49.5cm), elevated CPK, congenital dystrophy myotonic syndrome reported in EMG/NCV with myopathy and myotonic discharge.	Dystrophies	POMT1	Missense	Novel	Chr9:134394872A>G	Homozygote	NM_007171.4	c.1649A>G	p.Gln550Arg	Muscular dystrophy-dystroglycanopathy (congenital with brain and eye anomalies), type A, 1 [#MIM:236670]/ AR; Muscular dystrophy-dystroglycanopathy (congenital with impaired intellectual development), type B, 1 [#MIM:613155]/ AR; Muscular dystrophy-dystroglycanopathy (limb-girdle), type C, 1 [#MIM:609308]/ AR	Autosomal Recessive	VUS	PM2 PP3	Not checked	VUS	___	2023-07-03	No	___	___
Case322	104803	CMS	Solo	whole exome sequencing	Yes	Negative	Female	9 Y	Childhood	Childhood	Onset: 6-year old; Bilateral ptosis; Diplopia; Dysphagia; Nasal speech; Muscle weakness; Frequent falls; Easy fatigability; Dysarthria; Hx. of Thymectomy due to thymic follicular hyperplasia; Anti-acetylcholine receptor antibody positivity; EMG: Neuromuscular junction transmission disorder.	Negative	___	___	___	___	___	___	___	___	___	Sporadic	___	___	___	Negative	___	2022-12-19	No	___	___
Case323	104862	LGMD	Solo	whole exome sequencing	Yes	Positive	Male	20 Y	Adulthood	Childhood	Onset: 16 years; Lower limb muscle weakness, proximal; impaired toe-walking ability, mild; difficulty climbing stairs; gowers sign; calf muscle pseudohypertrophy; High CPK, LDH, AST & ALT; EMG: myopathic pattern.	Dystrophies	DYSF	Stop gain	Known	Chr2:71730438C>T	Homozygote	NM_003494.4	c.331C>T	p.Gln111*	Miyoshi muscular dystrophy 1 [#MIM:254130]/AR; Muscular dystrophy, limb-girdle, autosomal recessive 2 [#MIM:253601]/AR; Myopathy, distal, with anterior tibial onset [#MIM:606768]/AR	Autosomal Recessive	Pathogenic	PVS1_very strong,PM2,PP5	Not checked	Positive	PMID:21522182, 18853459,26671124, 33613410,21522182)	2022-10-12	No	___	SCV001755393
Case324	104948	LGMD	Solo	whole exome sequencing	No	Positive	Female	22 Y	Adulthood	Adulthood	Onset: 18 years old; Progressive muscle weakness, upper & lower, proximal>distal; Waddling gait; Hand tremor; Foot dorsiflexor weakness; Impaired toe-walking ability; Gowers sign; High CPK, LDH & Aldolase; High Lactate/Pyrovate ratio; Muscle biopsy: Muscular dystrophy; IHC: Dysferlinopathy.Above clinical information is based on HPO nomenclature.	Dystrophies	DYSF	Missense	Known	Chr2:71748001C>G	Homozygote	NM_003494.4	c.1020C>G	p.Ser340Arg	Miyoshi muscular dystrophy 1 [#MIM: 254130]/AR; Muscular dystrophy, limb-girdle, autosomal recessive 2 [#MIM: 253601]/AR; Myopathy, distal, with anterior tibial onset [#MIM: 606768]/AR	Autosomal Recessive	Likely Pathogenic	PM2/PP3/PS1	Not checked	Positive	PMID: 26404900; 25312915; 21522182	2022-12-15	No	___	___
Case325	104966	Muscle atrophy & Developmental delay	Solo	whole exome sequencing	Yes	Negative	Female	2 Y	Childhood	Childhood	Global developmental delay, severe; Generalized hypotonia; Muscle atrophy; Severe MR; Seizure; No speech; Excessive laughing.	Overlapping	COQ4	Missense	Novel	Chr9:131094466T>G	Homozygote	NM_016035.5	c.437T>G	p.Phe146Cys	Coenzyme Q10 deficiency, primary, 7; #MIM616276/AR	Autosomal Recessive	VUS	___	Not checked	VUS	___	2022-11-24	No	___	___
Case326	105030	Myopathy	Solo	whole exome sequencing	Yes	Negative	Male	14 Y	Childhood	Childhood	Onset: 10 years old; Difficulty walking, rising from seated position & climbing stairs; Foot dorsiflexor weakness; Increased muscle fatiguability; Palpitations; Dyspnea; Hypotonia; EMG: Mild myopathic process.	Neuromuscular junction disorders	COLQ	Missense	Novel	Chr3:15497469C>G	Homozygote	NM_005677.4	c.1132G>C	p.Gly378Arg	Myasthenic syndrome, congenital, 5 [#MIM:603034]/AR	Autosomal Recessive	VUS	PM2-PP3	Not checked	VUS	___	2022-12-19	No	___	___
Case327	105039	SMA	Solo	whole exome sequencing	No	Negative	Female	43 Y	Adulthood	Childhood	Onset age: 9-year old; Pelvic girdle muscle weakness; Upper & lower muscle weakness due to neuropathy; Frequent falls; Thenar, hypothenar & intrinsic muscle atrophy; Reduced muscle strength; Reduced tendon reflexes; Wheelchair bound since 16-year; EMG-NCV: in favor of motor neuron disease/SMA with severe axonal degeneration of motor nerves with superimposed with axonal sensory nerve damages.	Negative	___	___	___	___	___	___	___	___	___	Sporadic	___	___	___	Negative	___	2023-03-19	Multiplex Ligation Dependent Probe Amplification (MLPA) screening for deletions of SMN1 gene was previously performed in this laboratory which revealed that this individual has inherited one copy of exons 7 & 8 (carrier) in SMN1 gene.	___	___
Case328	105080	SMA	Solo	whole exome sequencing	Yes	Negative	Male	8 Y	Childhood	Childhood	Consanguineous parents, sporadic case, proximal muscle weakness, difficulty in climbing, ataxia, normal mental status , normal CPK and motor neuron disorder reported in EMG, negative MLPA for SMA type III.	Negative	___	___	___	___	___	___	___	___	___	Sporadic	___	___	___	Negative	___	2022-12-20	Multiplex Ligation Dependent Probe Amplification (MLPA) screening for deletions of SMN1, SMN2 and NAIP genes was previously performed in Isfahan Genetics Center for this individual which revealed no deletion in this patient.	___	___
Case329	105087	Hereditary paraplagia	Solo	whole exome sequencing	Yes	Negative	Female	19 Y	Adulthood	Childhood	Consanguineous parents, age of onset 8 years, frequent falling, climbing difficulty, spastic gait, proximal upper and lower muscle weakness, hyperreflexia (increased DTR), neurogenic changes reported in EMG/NCV, normal brain MRI and normal CPK.	Hereditary Paraplegia	CYP7B1	Stop gain	Known	Chr8:65528273A>T	Homozygote	NM_004820.5	c.825T>A	p.Tyr275*	Spastic paraplegia 5A, autosomal recessive [#MIM:270800], AR; Bile acid synthesis defect, congenital, 3 [#MIM:613812], AR	Autosomal Recessive	Pathogenic	PVS1, PP5, PM2	Not checked	Positive	PMIDs: 19439420, 27879220, and 28832565	2022-12-20	No	___	?
Case330	105146	CMS	Solo	whole exome sequencing	No	Negative	Female	4 Y	Childhood	Childhood	Sporadic case, age of onset 3 years, bilateral ptosis, recurrent respiratory infections, normal CPK, borderline anti MUSK antibody and neuromuscular junction disorder reported in EMG/NCV.	Negative	___	___	___	___	___	___	___	___	___	Sporadic	___	___	___	Negative	___	2023-01-01	No	___	___
Case331	105177	SMA	Solo	whole exome sequencing	Yes	Negative	Female	13 Y	Childhood	Childhood	Onset age: 8 month old; Mild generalized hypotonia; Poor sucking; Recurrent respiratory problems; Low-pitched cry; Generalized muscle weakness due to neuropathy; Fasciculations; Motor retardation; Wheelchair-bound since 6-year old; Scoliosis; Unilateral amblyopia & strabismus; EMG: suggestive of Motor-Neuron Disease, R/O SMA.	Negative	___	___	___	___	___	___	___	___	___	Sporadic	___	___	___	Negative	___	2023-02-01	Multiplex Ligation Dependent Probe Amplification (MLPA) screening for deletions of SMN1 gene was previously performed in Medical Genetics Center of Isfahan for this individual which revealed one copy of exons 7&8 in SMN1 gene.	___	___
Case332	105199	Myopathy	Solo	whole exome sequencing	No	Negative	Female	3 Y	Childhood	Childhood	Hypoxia & cyanosis at birth; Swallowing difficulty & hypotonia since birth; Open mouth; Bulbar muscle weakness; Delayed walking; Recurrent pulmonary infections; EMG: in favor of chronic myopathic process, facial & trigeminal nerves involvement; Brain MRI: mild dilation of lateral ventricle.	Negative	___	___	___	___	___	___	___	___	___	Sporadic	___	___	___	Negative	___	2023-02-02	No	___	___
Case333	105273	CMT	Solo	whole exome sequencing	No	Negative	Female	36 Y	Adulthood	Childhood	Onset age: 1.5 year old; Hand tremor; Steppage gait; Pes cavus; Difficulty walking; Lower and upper muscle weakness & atrophy due to neuropathy; Thenar & hypothenar atrophy; Foot drop; Impaired Tip-toe & heel walking; EMG-NCV: compatible with chronic axonal sensorimotor polyneuropathy, R/O CMT-2.	Neuropathies	INF2	Missense	Novel	Chr14:105169665G>A	Heterozygote	NM_022489.4	c.541G>A	p.Val181Ile	Charcot-Marie-Tooth disease, dominant intermediate E [#MIM:614455]/AD; Glomerulosclerosis, focal segmental, 5 [#MIM:613237]	Autosoaml Dominant	VUS	PM2-PM5-BP4	Inherited	VUS	___	2023-07-01	No	___	___
Case334	105285	CMT	Solo	whole exome sequencing	Yes	Negative	Female	48 Y	Adulthood	Adulthood	Onset age: 42- year old; Lower & upper muscle weakness, due to neuropathy; Muscle cramps; Muscle pain; Difficulty heel walking; Pes cavus, mild; Imbalance, intermittent; EMG-NCV: chronic sensorimotor polyneuropathy.	Negative	___	___	___	___	___	___	___	___	___	Sporadic	___	___	___	Negative	___	2023-04-27	Multiplex Ligation Dependent Probe Amplification (MLPA) screening for deletions and duplications in CMT/HNPP region was previously performed in this laboratory for this individual and revealed no Del/Dup in PMP22 gene of this individual.	___	___
Case335	105308	Myopathy	Solo	whole exome sequencing	No	Negative	Female	51 Y	Adulthood	Adulthood	Sporadic case, age of onset 49 years, proximal upper and lower muscle weakness, facial weakness, difficulty in swallowing (dysphagia) ,exertional dyspnea, speech difficulty, finger tingling, paresthesia, bilateral severe carpal tunnel syndrome,,CPK:654U/L ,hypothyroidism.	Negative	___	___	___	___	___	___	___	___	___	Sporadic	___	___	___	Negative	___	2023-01-24	No	___	___
Case336	105478	Hereditary ataxia	Solo	whole exome sequencing	No	Negative	Male	54 Y	Adulthood	Adulthood	Onset: 53 years old; Abnormal gait; Diplopia; Hand tremor; Cerebellar ataxia; Abnormal echocardiography.	Overlapping	CACNA1G	Large CNV duplication	Novel	Chr17:48685185-48685403	___	NM_018896.5	___	___	Spinocerebellar ataxia 42; #MIM616795/AD; Spinocerebellar ataxia 42, early-onset, severe, with neurodevelopmental deficits; #MIM618087/AD	Autosoaml Dominant	VUS	___	Not checked	VUS	___	44916	No	No	___
Case337	105697	Muscular dystrophy	Solo	whole exome sequencing	Yes	Positive	Male	28 Y	Adulthood	Adulthood	Consanguineous parents, muscle weakness and atrophy (proximal> distal and lower> upper), elevated CPK (26390 U/L), myopathic process reported in EMG, dysferlinopathy in IHC report, muscular dystrophy reported in muscle biopsy.	Dystrophies	DYSF	Frameshift	Known	Chr2:71795360A>AC	Homozygote	NM_003494.4	c.2706dupC	p.Lys903Glnfs*4	Muscular dystrophy, limb-girdle, autosomal recessive 2 [#MIM:253601], AR; Myopathy, distal, with anterior tibial onset [#MIM:606768], AR; Miyoshi muscular dystrophy 1 [#MIM:254130], AR	Autosomal Recessive	Pathogenic	PVS1, PM2, PP5	Not checked	Positive	PMID: 22616201; 31693312	2023-01-18	No	___	SCV001755403
Case338	105726	CMT	Solo	whole exome sequencing	Yes	Negative	Male	15 Y	Childhood	Childhood	Onset age: 14-year old with gait abnormality; EMG-NCV: Demyelinating sensorimotor polyneuropathy.	Negative	___	___	___	___	___	___	___	___	___	Sporadic	___	___	___	Negative	___	2023-01-21	Multiplex Ligation Dependent Probe Amplification (MLPA) screening for deletions and duplications in CMT/HNPP region was previously performed in this laboratory for this individual and revealed no Del/Dup in PMP22 gene of this individual.	___	___
Case339	105946	CMT	Solo	whole exome sequencing	Yes	Positive	Male	36 Y	Adulthood	Adulthood	Consanguineous parents, multiple affected individuals, distal upper and lower muscle weakness and atrophy, ataxic gait, pes cavus, delayed walking ,scanning speech, dysarthria, swan neck like deformities of the fingers, stripped like in brain MRI , demyelinating neuropathy in NCV.	Hereditary Ataxia	SACS	Stop gain	Novel	Chr13:23906350G>A	Homozygote	NM_014363.6	c.11665C>T	p.Gln3889*	Spastic ataxia, Charlevoix-Saguenay type [#MIM:270550]/AR	Autosomal Recessive	Likely Pathogenic	PVS1 PM2	Inherited	Positive	___	2023-10-01	No	___	___
Case340	105986	LGMD	Solo	whole exome sequencing	No	Negative	Female	21 Y	Adulthood	Adulthood	Onset age: 19-year old; Lower & upper proximal muscle weakness; Scapular winging, unilateral; Decreased muscle force; Hand tremor; Positive Gowers; Elevated CPK level; EMG-NCV: mild non-irritable myopathy; MRI of both thigh: chronic inflammatory myopathy; Muscle biopsy: prominent atrophy of type 2 fibers with necrosis/regeneration, some foci of perivascular perimysial chronic inflammation and mil…	Negative	___	___	___	___	___	___	___	___	___	Sporadic	___	___	___	Negative	___	2023-05-02	No	___	___
Case341	106053	Muscular dystrophy	Solo	whole exome sequencing	Yes	Negative	Female	37 Y	Adulthood	Adulthood	Consanguineous parents, age of onset 30 years, proximal upper and lower muscle weakness and wasting , climbing difficulty, waddling gait,polymyopathy reported in EMG, muscular dystophy reported in muscle biopsy and sarcolemmal labelling in IHC for dystrophin and sarcoglycans.	Dystrophies	CAPN3	Missense	Known	Chr15:42688999T>C	Homozygote	NM_000070.3	c.1117T>C	p.Trp373Arg	Muscular dystrophy, limb-girdle, autosomal dominant 4 [#MIM:618129]/ AD; Muscular dystrophy, limb-girdle, autosomal recessive 1 [#MIM:253600]/AR	Autosomal Recessive	Likely Pathogenic	PM1,PM2,PM3,PP2,PP3	Not checked	Positive	___	2023-08-02	No	___	SCV001755642
Case342	106079	Muscular dystrophy	Solo	whole exome sequencing	Yes	Negative	Male	45 Y	Adulthood	Adulthood	Onset age: 40-year old; Progressive proximal & distal weakness; Difficulty running & climbing steps; Gowers sign; Muscle biopsy: muscular dystrophy; EMG-NCV: non-active myopathic pattern in proximal limb & axonal sensorimotor polyneuropathy in lower limbs; Known case of DM.	Negative	___	___	___	___	___	___	___	___	___	Sporadic	___	___	___	Negative	___	2023-01-28	No	___	___
Case343	106113	Hereditary Neuropathy	Solo	whole exome sequencing	No	Positive	Female	61 Y	Adulthood	Not reported	Onset age: 58-year old; Distal lower & upper muscle weakness due to neuropathy; Hand tremor; Inability to heel & toe walk; Muscle wasting; EMG-NCV: chronic diffuse inactive anterior horn cell disease.	Negative	___	___	___	___	___	___	___	___	___	Familial	___	___	___	Negative	___	2023-01-19	No	___	___
Case344	106131	Leukodystrophy	Solo	whole exome sequencing	No	Negative	Male	25 Y	Adulthood	Adulthood	Onset age: 23-year old; Lower muscle neuropathy; Spastic gait; Ataxia; Muscle cramp; Foot drop; Urinary incontinence; Brain MRIs: high signal intensities in white matter & partial agenesis of corpus callosum, involvement of brainstem & degree of gliosis; MRS of brain: post-inflammatory or post-ischemic changes.	Negative	___	___	___	___	___	___	___	___	___	Sporadic	___	___	___	Negative	___	2023-02-19	No	___	___
Case345	106229	Muscular dystrophy	Solo	whole exome sequencing	No	Negative	Female	37 Y	Adulthood	Childhood	Sporadic case, age of onset 15 years, proximal and lower muscle weakness, lordosis, muscle atrophy, waddling gait, chronic myopathy process reported in EMG, dysferlinopathy reported in IHC.	Dystrophies	DYSF	Missense	Known	Chr2:71778203G>A	Heterozygote	NM_003494.4	c.1555G>A	p.Gly519Arg	Miyoshi muscular dystrophy 1 [#MIM:254130]/ AR; Muscular dystrophy, limb-girdle, autosomal recessive 2 [#MIM:253601]/ AR; Myopathy, distal, with anterior tibial onset [#MIM:606768]/ AR	Autosomal Recessive	Pathogenic	[PM2 PP3 PP5]+PS3 ???PP1???	Not checked	Unclear	___	2023-02-14	No	___	___
Case346	106270	LGMD	Solo	whole exome sequencing	Yes	Negative	Female	46 Y	Adulthood	Adulthood	Consanguineous parents, sporadic case, age of onset 21 years, progressive weakness in lower proximal and gradually upper proximal muscles, waddling gait, mild lordosis, positive Gower’s sign, chronic myopathic process in EMG, muscular dystrophy or chronic stages of polymyositis reported in muscle biopsy and sarcolemmal labelling for dystrophin, alpha and gamma sarcoglycans, dysferlin and merosin …	Negative	___	___	___	___	___	___	___	___	___	Sporadic	___	___	___	Negative	___	2023-02-15	No	___	___
Case347	106364	Congenital myotonia	Solo	whole exome sequencing	Yes	Negative	Male	17 Y	Childhood	Childhood	Consanguineous parents, sporadic case, age of onset 14 years, climbing difficulty, myotonia, and myotonia congenita suggested in EMG/NCV, normal echocardiography.	Negative	___	___	___	___	___	___	___	___	___	Sporadic	___	___	___	Negative	___	2023-07-02	No	___	___
Case348	106398	LGMD	Solo	whole exome sequencing	Yes	Negative	Male	6 Y	Childhood	Childhood	Consangunious parents, sporadic male case, age of onset 4 years, positive Gower’s sign, lower muscle weakness, waddling gait, lordosis, mild pseudohypertrophy, significantly elevated CPK, myopathic process reported in EMG.	Dystrophies	DMD	Frameshift	Novel	ChrX:32472868AT>A	Hemizygote	NM_004006.3	c.3513delA	p.Glu1171Aspfs*3	Duchenne muscular dystrophy [MIM#310200], XLR; Becker muscular dystrophy [MIM#300376], XLR; and Cardiomyopathy, dilated, 3B [MIM#302045], XL	X-linked	Likely Pathogenic	PVS1, PM2	Inherited	Positive	___	2023-04-10	Multiplex Ligation Dependent Probe Amplification (MLPA) screening for deletions and duplications in Dystrophin gene was previously performed in this laboratory for this individual which revealed no Del/Dup in this patient.	___	___
Case349	106551	CMT	Solo	whole exome sequencing	No	Negative	Male	46 Y	Adulthood	Adulthood	Onset from 10-months ago with Numbness & Paresthesia; Muscle weakness, generalized; Difficulty walking & climbing steps; Mild pes cavus, bilateral; Distal neuropathy, lower & upper limbs; EMG-NCV: compatible with chronic sensorimotor demyelinating polyneuropathy.	Negative	___	___	___	___	___	___	___	___	___	Sporadic	___	___	___	Negative	___	2023-02-19	The MLPA analysis for this individual revealed no duplication or deletion of a 1.5 Mb region on chromosome 17p11.2 (CMT/HNPP region) which means that the phenotype is not due to the PMP22 gene duplication or deletion.	___	___
Case350	106675	Myopathy	Solo	whole exome sequencing	No	Negative	Male	71 Y	Adulthood	Adulthood	Non-related parents, sporadic case, age of onset 65 years , lower muscle weakness,neuropathy,spinal canal stenosis (L4-L5) ,decreased DTR, muscle cramp,mild hand tremor, history of parkinson and elevated CPK.	Negative	___	___	___	___	___	___	___	___	___	Sporadic	___	___	___	Negative	___	2023-02-03	No	___	___
Case351	106689	Hereditary Neuropathy	Solo	whole exome sequencing	No	Negative	Male	63 Y	Adulthood	Adulthood	Sporadic case, age 63 years, age of onset 57 years, distal lower muscle weakness, pes cavus, foot drop, decreased deep tendon reflexes(DTR) ,distal hereditary motor neuropathy (distal SMA) reported in EMG/NCV.	Neuropathies	HSPB1	Missense	Known	Chr7:75933161G>A	Heterozygote	NM_001540.5	c.407G>A	p.Arg136Gln	Charcot-Marie-Tooth disease, axonal, type 2F (CMT2F) [#MIM:606595], AD; Neuronopathy, distal hereditary motor, type IIB (HMN2B) [#MIM:608634], AD	Autosoaml Dominant	Pathogenic	PM1, PM2, PM5-Strong, PP2, PP3, PP5	Not checked	Positive	PMID: 25614874,21611841, 22176143, 25547330, 26989944	2023-03-13	No	___	___
Case352	106691	Hereditary ataxia	Solo	whole exome sequencing	Yes	Negative	Female	8 Y	Childhood	Childhood	Consanguineous parents, sporadic case, age 8 years, bilateral sensory neural hearing loss(SNHL), axonal sensory motor neuropathy, ataxic gait and loss of deep tendon reflexes (areflexia)	Hereditary Ataxia	TWNK	Missense	Known	Chr10:102748841C>A	Homozygote	NM_021830.5	c.874C>A	p.Pro292Thr	Mitochondrial DNA depletion syndrome 7 (hepatocerebral type) [#MIM:271245], AR; Perrault syndrome 5 [#MIM:616138], AR; Progressive external ophthalmoplegia with mitochondrial DNA deletions, autosomal dominant 3 [#MIM:609286], AD	Autosomal Recessive	Likely Pathogenic	PM2, PM3, PP2, PP3, PP5	Not checked	Positive	PMID: 29302074; 31823625	2023-12-03	No	___	___
Case353	106800	Congenital myopathy	Solo	whole exome sequencing	No	Negative	Female	9 Y	Childhood	Childhood	Onset age: 1.5 year old; Lower & upper muscle weakness, proximal>distal; Frequent falls; Abnormal gait; Wheelchair-bound; Increased CPK level; Restrictive lung disease, moderate; EMG-NCV: non-irritable myopathic process.	Dystrophies	COL6A1	Splicing	Novel	Chr21:47409656G>A	Heterozygote	NM_001848.3	c.904-10G>A	___	Bethlem myopathy 1 [MIM#158810]/AD, AR; Ullrich congenital muscular dystrophy 1 [MIM#254090]/AD, AR	Autosoaml Dominant	VUS	PM2, PP3	De novo	VUS	___	2023-02-27	No	___	___
Case354	106802	Myopathy	Solo	whole exome sequencing	Yes	Negative	Female	4 Y	Childhood	Childhood	Consanguineous parents, distal muscle weakness, decreased DTR, moderated form of congenital myopathy reported in EMG/NCV, no dystrophy sign.	Neuropathies	PRX	Stop gain	Known	Chr19:40903169G>A	Homozygote	NM_181882.3	c.1090C>T	p.Arg364*	Charcot-Marie-Tooth disease, type 4F [#MIM:614895]/AR; Dejerine-Sottas disease [#MIM:145900]/ AD, AR	Autosomal Recessive	Pathogenic	PVS1 PM2 PP5]+PM1??	Not checked	Positive	PMID: 21741241, 30724636	2023-01-03	No	___	SCV001167082
Case355	106809	CMT	Solo	whole exome sequencing	Yes	Positive	Male	15 Y	Childhood	Childhood	Onset age: 11-month with inability to move, lower limbs>upper limbs; Muscular dystrophy	Neuropathies	GDAP1	Frameshift	Novel	Chr8:75262696GA>G	Homozygote	NM_018972.4	c.1delA	p.Met1Trpfs*14	Charcot-Marie-Tooth disease, axonal, type 2K [#MIM:607831] AD, AR; Charcot-Marie-Tooth disease, axonal, with vocal cord paresis [#MIM:607706] AR; Charcot-Marie-Tooth disease, recessive intermediate, A [#MIM:608340] AR; Charcot-Marie-Tooth disease, type 4A [#MIM:214400] AR	Autosomal Recessive	Likely Pathogenic	PM2/PS1/PVS1-Strong	Inherited	Positive	___	2023-02-19	No	___	___
Case356	106821	NMD	Solo	whole exome sequencing	Yes	Negative	Male	9 Y	Childhood	Childhood	Consanguineous parents, sporadic case, age of onset 4 years, lower and upper proximal muscle weakness( limb girdle pattern), waddling gait, decreased deep tendon reflexes(DTR), highly elevated CPK , normal echocardiography and negative MLPA for dystrophin	Dystrophies	SGCB	Frameshift	Novel	Chr4:52899654GC>G	Homozygote	NM_000232.5	c.185delG	p.Gly62Alafs*3	Muscular dystrophy, limb-girdle, autosomal recessive 4 [#MIM: 604286], AR	Autosomal Recessive	Pathogenic	PVS1-PM2-PP5	Not checked	Positive	___	2023-06-03	Multiplex Ligation Dependent Probe Amplification (MLPA) screening for deletions and duplications in DMD gene was previously performed in Medical Genetics laboratory of Sana for this individual which revealed no Del/Dup in this patient	___	SCV001755580
Case357	106859	Myopathy	Solo	whole exome sequencing	Yes	Negative	Male	48 Y	Adulthood	Adulthood	Consanguineous parents , sporadic case, age of onset 38 years, lower more than upper muscle weakness, walking and standing inability, mild muscle atrophy, hypotonia, slightly elevated CPK, fatty degeneration in hamstring and right thigh muscles due to myopathy reported in muscle MRI and rimmed vacuole reported in muscle biopsy.	Negative	___	___	___	___	___	___	___	___	___	Sporadic	___	___	___	Negative	___	2023-11-03	No	___	___
Case358	106892	Congenital myopathy	Solo	whole exome sequencing	Yes	Positive	Female	43 Y	Adulthood	Adulthood	Onset age: 29-year old; Lower muscle cramps & wasting; Difficulty rising from seated position; Muscle pain; Lower limbs weakness; Waddling gait; Lordosis; Gowers sign; Hx. of seizures; Muscle MRI: fatty changes/replacement suggestive of dystrophic myopathy.	Dystrophies	JAG2	Missense	Novel	Chr14:105614156A>G	Homozygote	NM_002226.5	c.2318T>C	p.Phe773Ser	Muscular dystrophy, limb-girdle, autosomal recessive 27 [#MIM:619566]/AR	Autosomal Recessive	VUS	PM2,PP3	Inherited	VUS	___	2023-03-30	No	___	___
Case359	106921	SMA	Solo	whole exome sequencing	No	Negative	Female	51 Y	Adulthood	Adulthood	Onset age: 22-year old; Neuropathy; Lower muscle weakness; Foot drop; Difficulty running & climbing steps; Gowers sign; EMG-NCV: suggestive of chronic motor neuropathy/neuronopathy, also sensory potentials showed borderline amplitudes.	Negative	___	___	___	___	___	___	___	___	___	Sporadic	___	___	___	Negative	___	2023-03-16	Quantitative analysis by Multiplex Ligation Dependent Probe Amplification (MLPA) for exons VII and VIII in SMN1 & SMN2 genes was previously performed in this laboratory for this individual, and revealed two copies of exons 7&8 in SMN1 gene. Therefore she is normal for deletion in exons 7 & 8 of SMN1 gene.	___	___
Case360	106993	Anterior horn cell disease	Solo	whole exome sequencing	Yes	Negative	Male	31 Y	Adulthood	Not reported	Consanguineous parents, sporadic case, proximal lower muscle weakness, climbing ,walking and running difficulty started at age 9 years , proximal upper muscle weakness started 18 months earlier, foot drop, anterior horn cell disease reported in EMG/NCV and elevated CPK.	Negative	___	___	___	___	___	___	___	___	___	Sporadic	___	___	___	Negative	___	2023-11-19	Quantitative analysis by Multiplex Ligation Dependent Probe Amplification (MLPA) for exons VII and VIII in SMN1 & SMN2 genes was previously performed in this laboratory for this individual, and revealed two copies of exons 7&8 in SMN1 gene.	___	___
Case361	107045	CMT	Solo	whole exome sequencing	Yes	Negative	Female	33 Y	Adulthood	Childhood	Onset age: 17-year; Lower & upper muscle weakness & atrophy due to neuropathy; Gowers sign; Pes cavus; EMG-NCV: chronic severe demyelinating sensorimotor polyneuropathy.	Negative	___	___	___	___	___	___	___	___	___	Sporadic	___	___	___	Negative	___	2023-05-13	Multiplex Ligation Dependent Probe Amplification (MLPA) screening for deletions and duplications in CMT/HNPP region was previously performed in this laboratory for this individual and revealed no Del/Dup in PMP22 gene of this individual.	___	___
Case362	107046	Hereditary paraplagia	Solo	whole exome sequencing	Yes	Negative	Male	21 Y	Adulthood	Childhood	Delayed motor milestones; Hypotonia; Speech problem due to unilateral hearing loss; Flat occiput; Long nose; Facial weakness, mild; Strabismus & Amblyopia; Ataxia; Neuropathy, feet; Spastic gait; Flat feet; Brain MRI: cerebellar malformation; Elevated LFT; EMG-NCV: chronic focal distal motor neuropathy/neuronopathy restricted to upper limbs.	Overlapping	POLG	Missense	Known	Chr15:89862284C>T	Heterozygote	NM_002693.3	c.3151G>A	p.Gly1051Arg	Mitochondrial DNA depletion syndrome 4A (Alpers type) [#203700]/AR; Mitochondrial DNA depletion syndrome 4B (MNGIE type) [#MIM613662]/AR; Mitochondrial recessive ataxia syndrome (includes SANDO and SCAE) [#MIM607459]/AR; Progressive external ophthalmoplegia, autosomal dominant 1 [#MIM157640]/AD; Progressive external ophthalmoplegia, autosomal recessive 1 [#MIM258450]/AR	Autosoaml Dominant	Likely Pathogenic	PS1,PM2,PP3,PP5,PP2,PM5	Not checked	Unclear	PMID: 14745080, 28130605, 30818899,17980715, 20185557	2023-03-16	No	___	___
Case363	107213	CMT	Solo	whole exome sequencing	Yes	Positive	Male	30 Y	Adulthood	Adulthood	onsanguineous parents, multiple affected individuals in three generation,age of onset 24 years,lower muscle pain, pes cavus, genu recurvatum ,hereditary axonal symmetric sensory motor polyneuropathy or anterior horn cell disease in favor of distal SMA reported in EMG/NCV.	Neuropathies	SORD	Frameshift	Novel	Chr15:45361216CG>C	Homozygote	NM_003104.6	c.757delG	p.Ala253Glnfs*27	Sorbitol dehydrogenase deficiency with peripheral neuropathy [#MIM: 618912], AR	Autosomal Recessive	Pathogenic	Not Provided	Inherited	Positive	___	2023-03-16	No	___	SCV001755401
Case364	107251	Muscular dystrophy	Solo	whole exome sequencing	Yes	Negative	Male	17 Y	Childhood	Childhood	Onset age: 10-year old; Lower & upper muscle weakness, proximal; Abnormal gait; Scoliosis; Contracture, mild; Flat feet; Gowers sign; Rigid spine; Fibrous band, cervical; EMG-NCV: myopathic process.	Myopathies	SELENON	Inframe deletion	Novel	Chr1:26139179TCTC>T	Homozygote	NM_020451.3	c.1286_1288delCCT	___	Congenital myopathy 3 with rigid spine [#MIM602771]/AR	Autosomal Recessive	VUS	PM2,PM4	Not checked	VUS	___	2023-11-03	No	___	___
Case365	107255	Myopathy	Solo	whole exome sequencing	No	Positive	Female	49 Y	Adulthood	Adulthood	Age 49 years, age of onset 37 years, distal muscle cramps, distal and proximal muscle weakness of the lower limbs , waddling gait, climbing difficulty, positive Gower’s sign, slightley elevated CPK ,thrombocytopenia, history of splenctomy, myopathy and myogenic pattern reported in EMG/NCV , nonspecific muscle atrophy with rimmed vacueles reported in muscle biopsy, no specific nerve cell or vascul…	Myopathies	GNE	Missense	Known	Chr9:36219910A>C	Homozygote	NM_001128227.3	c.1834T>G	p.Cys612Gly	Nonaka myopathy [#MIM:605820]/ AR; Sialuria [#MIM:269921]/ AD	Autosomal Recessive	Likely Pathogenic	[PM1 PM2 PP3]+PP2??	Not checked	Positive	PMID: 25422667,24796702	2023-03-17	No	___	___
Case366	107264	Myopathy	Solo	whole exome sequencing	Yes	Positive	Male	39 Y	Adulthood	Childhood	epatosplenomegaly; Generalized muscle weakness, proximal>distal in limbs; Muscle wasting; Scapular winging; Achilles tendon contracture; Mental retardation, mild; Seizure; Elevated CPK, LDH & Aldolase levels; Increased AST & ALT; EMG-NCV: non-irritable myopathic process; MRI of Lt. leg & femur & Rt. femur: fatty degeneration suggestive of myopthy; Muscle biopsy: suggestive of GSD type 3.	Myopathies	AGL	Stop gain	Novel	Chr1:100361933T>G	Homozygote	NM_000642.3	c.3351T>G	p.Tyr1117*	Glycogen storage disease IIIa [#MIM:232400]/AR; Glycogen storage disease IIIb [#MIM:232400]/AR	Autosomal Recessive	Likely Pathogenic	PVS1,PM2	Not checked	Positive	___	2023-11-03	No	___	___
Case367	107270	LGMD	Solo	whole exome sequencing	Yes	Positive	Male	18 Y	Adulthood	Childhood	Onset age: 16-year old; Lower muscle weakness; Gower sign; Tip-toe walking; Difficulty climbing steps, walking & running; EMG-NCV: myopathic process suggestive of Becker muscular dystrophy; Elevated CPK, LDH, Aldolase, ALT & AST.	Dystrophies	CAPN3	Stop gain	Known	Chr15:42679970G>A	Homozygote	NM_000070.3	c.518G>A	p.Trp173*	Muscular dystrophy, limb-girdle, autosomal dominant 4 [#MIM:618129]/AD; Muscular dystrophy, limb-girdle, autosomal recessive 1 [#MIM:253600]/AR	Autosomal Recessive	Likely Pathogenic	PVS1-very strong/PM2/PM1?/PP5?	Not checked	Positive	PMID:15689361	2023-06-03	No	___	___
Case368	107383	Hereditary ataxia	Solo	whole exome sequencing	No	Negative	Female	29 Y	Adulthood	Adulthood	Onset age: 24-year old; Ataxia; Muscle weakness; Speech problem; Difficulty swallowing, liquid; Spasticity; Muscle atrophy; Wheelchair-bound.	Negative	___	___	___	___	___	___	___	___	___	Sporadic	___	___	___	Negative	___	2023-02-03	No	___	___
Case369	107546	Hereditary Neuropathy	Solo	whole exome sequencing	Yes	Negative	Male	33 Y	Adulthood	Adulthood	Onset age: 25-year old; Neuropathy, lower limbs; Difficulty running; Lower muscle weakness & atrophy due to neuropathy, distal; Abnormal gait; Foot drop; EMG-NCV: suggestive of anterior horn cell damage (myelopathy) or radiculopathy, R/O distal SMA.	Negative	___	___	___	___	___	___	___	___	___	Sporadic	___	___	___	Negative	___	2023-03-16	No	___	___
Case370	107692	Hereditary Neuropathy	Solo	whole exome sequencing	No	Positive	Male	23 Y	Adulthood	Childhood	Onset age: 12-year old; Muscle cramp, lower limb; Muscle pain; Increased muscle force; EMG-NCV: chronic motor neuropathy.	Neuropathies	HARS1	Missense	Known	Chr5:140058645A>C	Heterozygote	NM_002109.6	c.464T>G	p.Val155Gly	Charcot-Marie-Tooth disease, axonal, type 2W [#MIM616625]/AD; Usher syndrome type 3B [#MIM614504]/AR	Autosoaml Dominant	VUS	PM2,PP5	Not segregated	VUS	PMID: 29235198, 36164730	2023-07-03	No	___	___
Case371	107706	Muscular dystrophy	Solo	whole exome sequencing	No	Negative	Female	41 Y	Adulthood	Adulthood	Two affected siblings, age 41 years, age of onset 30 years, lower proximal muscle weakness (girdle pattern), waddling gait, fatty degeneration in adductors and hamstrings muscles reported in muscle MRI, fatty replacement with degeneration, regeneration muscle fibers reported in muscle biopsy of quadriceps .slightly elevated CPK.	Negative	___	___	___	___	___	___	___	___	___	Sporadic	___	___	___	Negative	___	2023-03-18	No	___	___
Case372	107831	Congenital myopathy	Solo	whole exome sequencing	No	Negative	Female	10 Y	Childhood	Childhood	Sporadic case ,age 10 years, age of onset 5 years, prominent muscle weakness, lower muscle cramps, tiptoe walking, chronic myopathic changes in EMG, elevated CPK (870 U/L) , slightly muscle atrophy with no necrosis/regenreation or inflammation in muscle boipsy, normal spinal MRI	Negative	___	___	___	___	___	___	___	___	___	Sporadic	___	___	___	Negative	___	2023-07-04	No	___	___
Case373	107923	Mitochondrial disease	Solo	whole exome sequencing	Yes	Negative	Female	63 Y	Adulthood	Adulthood	Onset age: 48-year old; Facial weakness, bilateral ptosis; Hypotonia; Proximal muscle weakness & wasting; Dysarthria; Single fiber EMG: suggestive of mild neuromuscular junction disorder; Muscle biopsy: suggestive of mitochondrial myopathies; Brain MRI: suggestive of ischemia of atherosclerotic micro-vascular occlusive disease.	Overlapping	RNASEH1	Missense	Novel	Chr2:3604486C>T	Homozygote	NM_002936.6	c.137G>A	p.Cys46Tyr	Progressive external ophthalmoplegia with mitochondrial DNA deletions, autosomal recessive 2; #MIM616479/AR	Autosomal Recessive	VUS	PM2, PP3, PP4	Not checked	VUS	___	2023-12-03	No	___	___
Case374	107943	Hereditary Neuropathy	Solo	whole exome sequencing	Yes	Negative	Male	20 Y	Adulthood	Childhood	Consanguineous parents, age of onset 8 years, distal upper and lower muscle weakness, gait abnormality, running difficulty, pes cavus, distal spinal muscular atrophy or axonal moto r neuropathy reported in EMG/NCV, normal brain MRI	Hereditary Paraplegia	PNPLA6	Missense	Novel	Chr19:7614965C>T	Homozygote	NM_006702.5	c.1664C>T	p.Thr555Ile	?Laurence-Moon syndrome [#MIM:245800]/ AR; Boucher-Neuhauser syndrome [#MIM:215470]/ AR; Oliver-McFarlane syndrome [#MIM:275400]/AR; Spastic paraplegia 39, autosomal recessive [#MIM:612020]/AR	Autosomal Recessive	VUS	PM2	Inherited	VUS	___	2023-11-07	No	___	___
Case375	107967	Metabolic myopathy	Solo	whole exome sequencing	No	Negative	Female	23 Y	Adulthood	Adulthood	Sporadic case, 21 years, age of onset 16 years, axial and proximal muscle weakness, dysphagia, tingling, numbness, easy fatigability, lipid storage myopathy reported in muscle biopsy, chronic non inflammatory poly myopathy reported in EMG/NCV, elevated CPK	Negative	___	___	___	___	___	___	___	___	___	Sporadic	___	___	___	Negative	___	2023-03-18	No	___	?
Case376	108049	CMT	Solo	whole exome sequencing	Yes	Negative	Male	33 Y	Adulthood	Not reported	Onset age: 18-year old; Lower muscle weakness; Upper muscle weakness, distal>proximal; Difficulty running; Pes cavus; Inability to tip-toe walking; EMG-NCV: chronic axonal sensorimotor polyneuropathy.	Negative	___	___	___	___	___	___	___	___	___	Sporadic	___	___	___	Negative	___	2023-03-13	No	___	___
Case377	108055	Mitochondrial disease	Solo	whole exome sequencing	Yes	Negative	Male	9 M	Childhood	Childhood	Developmental retardation; Cognitive impairment, mild; Hypotonia, mild; Brain ultrasound: suggestive of ventriculomegaly; Elevated SGOT & CPK	Overlapping	FBXL4	Missense	Novel	Chr6:99365257G>A	Homozygote	NM_012160.5	c.851C>T	p.Pro284Leu	Mitochondrial DNA depletion syndrome 13 (encephalomyopathic type); #MIM615471/AR	Autosomal Recessive	VUS	PM2, PP3	Not checked	VUS	___	2023-12-03	No	___	___
Case378	108057	LGMD	Solo	whole exome sequencing	No	Negative	Female	27 Y	Adulthood	Adulthood	Onset age: 23-year old; Generalized muscle wasting; Muscle weakness, lower & upper; Poor swallowing; Increased CPK; Muscle biopsy: myopathic atrophy with multiple necrotic and degenerative/regenerative fibers and mild focal endomysial fibrosis; EMG-NCV: suggestive of inflammatory myopathies, storage myopathies, dystrophic myopathies.	Negative	___	___	___	___	___	___	___	___	___	Sporadic	___	___	___	Negative	___	2023-03-16	No	___	?
Case379	108113	Hereditary paraplagia	Solo	whole exome sequencing	Yes	Positive	Male	41 Y	Adulthood	Not reported	Consanguineous parents, two affected siblings, age 42 years , spastic gait started 3 years earlier, progressive spastic paraplegia dysarthria, unbalanced gait and normal EMG/NCV.	Hereditary Paraplegia	ATP13A2	Missense	Novel	Chr1:17313374G>A	Homozygote	NM_022089.4	c.3161C>T	p.Ser1054Phe	Kufor-Rakeb syndrome [#MIM:606693]/ AR; Spastic paraplegia 78, autosomal recessive [#MIM:617225]/ AR	Autosomal Recessive	VUS	PM2 PP3	Not checked	VUS	___	2023-07-26	No	___	?
Case380	108151	Congenital myopathy	Solo	whole exome sequencing	No	Negative	Female	42 Y	Adulthood	Childhood	Onset age: 5-6 years ago; Muscle fatiguability; Frequent falls; Proximal muscle weakness, lower & upper limbs; Dysphonia; Blurred vision; Hand tremor; Gowers sign; Muscle biopsy: compatible with lipid storage myopathy; Elevated CPK; EMG-NCV: myopathic pattern.	Negative	___	___	___	___	___	___	___	___	___	Sporadic	___	___	___	Negative	___	2023-01-05	No	___	___
Case381	108199	Hereditary Neuropathy	Solo	whole exome sequencing	Yes	Negative	Female	33 Y	Adulthood	Not reported	Severe muscle weakness; Hypotonia; Upper limbs weakness, more severe in fingers; No ability to walk; Wheelchair-bound; EMG-NCV: generalized & very severe symmetric sensorimotor axonal & demyelinating polyneuropathy in lower limbs with severe muscle wasting.	Neuropathies	IGHMBP2	Splicing	Known	Chr11:68675806G>T	Homozygote	NM_002180.3	c.449+1G>T	___	Charcot-Marie-Tooth disease, axonal, type 2S [#MIM616155]/AR; Neuronopathy, distal hereditary motor, type VI [#MIM604320]/AR	Autosomal Recessive	Pathogenic	PVS1(Very Strong),PM2,PP5	Not checked	Positive	___	2023-09-04	No	___	SCV001167085.1
Case382	108293	Metabolic myopathy	Solo	whole exome sequencing	Yes	Negative	Female	12 Y	Childhood	Childhood	Onset age: 6-year old; Early fatiguability; Muscle cramps; Muscle weakness, proximal>distal; Myopia; Increased CPK & AST; Muscle biopsy: subsarcolemmal vacuoles containing glycogen (PAS positive) suggestive of glycogen storage myopathy, type III or V.	Myopathies	PYGM	Missense	Novel	Chr11:64518803C>T	Homozygote	NM_005609.4	c.1963G>A	p.Glu655Lys	McArdle disease [#MIM:232600]/AR	Autosomal Recessive	Likely Pathogenic	PP3/PM2/PM3/PP2?	Not checked	Positive	___	2023-03-19	No	___	___
Case383	108331	LGMD	Solo	whole exome sequencing	No	Positive	Male	41 Y	Adulthood	Adulthood	Arrhythmia since 24-year old; Cardiomyopathy; Muscle weakness since 35-year old, proximal>distal, lower>upper; Muscle atrophy; Difficulty climbing steps; Early fatigue; Ptosis, bilateral; Tingling, hands & feet; EMG-NCV: myopathic process; Muscle biopsy: suggestive myofibrillar myopathy.	Myopathies	DES	Missense	Known	Chr2:220290456C>T	Heterozygote	NM_001927.4	c.1360C>T	p.Arg454Trp	Cardiomyopathy, dilated, 1I [#MIM:604765]/AD; Myopathy, myofibrillar, 1 [#MIM:601419]/AD, AR; Scapuloperoneal syndrome, neurogenic, Kaeser type [#MIM:181400]/AD	Autosoaml Dominant	Pathogenic	PM1,PM2,PP3,PP5, PP2?,PS3	Not checked	Positive	PMID: 17221859, 20423733, 22106715, 22153487, 23349452, 25557463, 27854218,17221859, 20171226, 20448486	2023-11-03	No	___	___
Case384	108437	FSHD	Solo	whole exome sequencing	No	Negative	Male	39 Y	Adulthood	Adulthood	Sporadic case, proximal and distal muscle weakness, facial muscle weakness, foot drop , scapula winging, myopathy reported in EMG,muscular dystrophy reported in muscle biopsy.	Dystrophies	SMCHD1	Frameshift	Known	Chr18:2732487TAAAG>T	Heterozygote	NM_015295.3	c.3274_3276+1del	(p.?)	Bosma arhinia microphthalmia syndrome [#MIM:603457]/ AD; Fascioscapulohumeral muscular dystrophy 2, digenic [#MIM:158901]/DD	Autosoaml Dominant	Likely Pathogenic	PVS1 PM2 PP5	Not checked	Positive	PMID: 27061275; 25370034,25256356; 25370034	2023-05-09	This individual has been previously investigated for D4Z4 allele contraction in Bristol Genetics Laboratory and FSHD type 1 has been ruled out.	___	___
Case385	108489	CMS	Solo	whole exome sequencing	No	Negative	Female	6 Y	Childhood	Childhood	Onset age: 6-year old; Ptosis; Diplopia; Chewing difficulty; Nasal speech; Mild lower muscle weakness, proximal; Negative AChR antibody & anti-MuSK antibody.	Negative	___	___	___	___	___	___	___	___	___	Sporadic	___	___	___	Negative	___	2023-03-16	No	___	___
Case386	108522	CMT	Solo	whole exome sequencing	Yes	Negative	Male	13 Y	Childhood	Childhood	Consanguineous parents, age 13 years, distal muscle weakness in lower and upper exterimities.	Neuropathies	MFN2	Missense	Known	Chr1:12052717G>A	Heterozygote	NM_014874.4	c.281G>A	p.Arg94Gln	Charcot-Marie-Tooth disease, axonal, type 2A2A [#MIM:609260]/ AD; Charcot-Marie-Tooth disease, axonal, type 2A2B [#MIM:617087]/ AR; Hereditary motor and sensory neuropathy VIA [#MIM:601152]/ AD	Autosoaml Dominant	Pathogenic	PM2 PP3 PP5 PM5	De novo	Positive	PMID: 15064763, 15549395, 16714318, 17437620, 18996695, 19889647, 20350294, 21508331, 22492563, 24604904, 25025039,17215403, 17296794, 20335458, 20418531, 21285398, 22442078	2023-01-05	No	___	___
Case387	108540	Hereditary paraplagia	Solo	whole exome sequencing	Yes	Negative	Female	17 Y	Childhood	Childhood	Developmental delay; Speech delay; Mild mental retardation; Delayed walking; Difficulty climbing steps & rising from seated position; Generalized hypotonia; Early fatiguability of the musculature; Brain MRIs: suggestive of metabolic disease, ADEM disease, Demyelinating disease or Multiple sclerosis; EMG-NCV: suggestive of upper motor neuron lesions (transvers myelitis); Elevated CPK & Aldolase; I…	Hereditary Paraplegia	SPG11	Frameshift	Novel	Chr15:44905661C>CTAAAAATTCAAACCAAGGGTGTGCTTCATGTA	Homozygote	NM_025137.4	c.3080_3111dup	p.Val1038Tyrfs*11	Amyotrophic lateral sclerosis 5, juvenile [#MIM602099]/AR; Charcot-Marie-Tooth disease, axonal, type 2X [#MIM616668]/AR; Spastic paraplegia 11, autosomal recessive [#MIM604360]/AR	Autosomal Recessive	Likely Pathogenic	PVS1,PM2	Not checked	Positive	___	2023-03-19	No	___	___
Case388	108666	Rhabdomyolysis	Solo	whole exome sequencing	Yes	Positive	Male	36 Y	Adulthood	Adulthood	Onset age: 24-year; Muscle weakness, lower>upper limbs; Rhabdomyolysis, episodic; Muscle pain & weakness, episodic; Difficulty climbing steps; Muscle atrophy; Imbalance; Gowers sign; EMG-NCV: chronic polymyopathy with irritative feature; Muscle biopsy: myopathic atrophy with multiple necrotic and degenerative/regenerative fibers and prominent internalization of nuclei but neither fibrosis nor inf…	Negative	___	___	___	___	___	___	___	___	___	Familial	___	___	___	Negative	___	2023-01-05	No	___	___
Case389	108723	ALS	Solo	whole exome sequencing	No	Negative	Male	38 Y	Adulthood	Adulthood	Onset age:34-year old; Hypotonia; Muscle weakness due to neuropathy, upper>lower; Difficulty rising from seated position; Foot dorsiflexor weakness; Frequent falls; Elevated Aldolase level; EMG-NCV: suggestive of active motor neuron disease.	Negative	___	___	___	___	___	___	___	___	___	Sporadic	___	___	___	Negative	___	2023-03-19	No	___	___
Case390	108783	Myopathy	Solo	whole exome sequencing	Yes	Negative	Female	38 Y	Adulthood	Adulthood	Consanguineous parents, age 38 years ,age of onset childhood, acceleration at age 25 years, muscle weakness in lower and upper exterimities, climbing difficulty, positive Gower’ s sign, decreased DTR, normal CPK, normal echocardiography, chronic myopathic process in EMG, myopathy atrophy with some red ragged fiber in muscle biopsy but no muscular dystrophy patterm, normal IHC labelling for dystro…	Negative	___	___	___	___	___	___	___	___	___	Sporadic	___	___	___	Negative	___	2023-05-17	No	___	___
Case391	109221	CMT	Solo	whole exome sequencing	No	Negative	Male	5 Y	Childhood	Childhood	Onset age: 3-year old; Frequent falls; Distal lower limb muscle weakness due to peripheral neuropathy; Abnormal gait; Foot drop; EMG-NCV: Sensorimotor polyneuropathy.	Neuropathies	GDAP1	Missense	Known	Chr8:75272408T>G	Homozygote	NM_018972.4	c.347T>G	p.Met116Arg	Charcot-Marie-Tooth disease, axonal, type 2K [#MIM:607831]/AD, AR; Charcot-Marie-Tooth disease, axonal, with vocal cord paresis [#MIM:607706]/AR; Charcot-Marie-Tooth disease, recessive intermediate, A [#MIM:608340]/AR; Charcot-Marie-Tooth disease, type 4A [#MIM:214400]/AR	Autosomal Recessive	Likely Pathogenic	PM2- PM1- PP5- PP3- PP2	Not checked	Positive	PMID: 15377708	2023-04-27	No	___	SCV001755211
Case392	109246	NMD	Solo	whole exome sequencing	Yes	Negative	Male	1 Y	Childhood	Childhood	Consanguineous parents, age 13 months, recurrent vomiting, feeding difficulties, respiratory distress, recurrent seizure, hypotonia, muscle weakness, facial weakness, recurrent aspiration pneumonia,normal brain MRI, abnormal EEG	Neuromuscular junction disorders	SLC18A3	Missense	Novel	Chr10:50820020C>A	Homozygote	NM_003055.3	c.1234C>A	p.Arg412Ser	Myasthenic syndrome, congenital, 21, presynaptic [#MIM: 617239], AR	Autosomal Recessive	VUS	PM2-PP3	Not checked	VUS	___	2023-01-05	No	___	___
Case393	109280	CMT	Solo	whole exome sequencing	Yes	Positive	Female	52 Y	Adulthood	Adulthood	Onset age: 32-year old; Upper & lower distal muscle weakness & atrophy due to neuropathy; Pes cavus; Abnormal gait; EMG-NCV: chronic demyelinating sensorimotor polyneuropathy.	Negative	___	___	___	___	___	___	___	___	___	Familial	___	___	___	Negative	___	2023-05-13	Multiplex Ligation Dependent Probe Amplification (MLPA) screening for deletions and duplications in CMT/HNPP region was previously performed in this laboratory for this individual and revealed no Del/Dup in PMP22 gene of this individual.	___	___
Case394	109385	LGMD	Solo	whole exome sequencing	No	Negative	Female	5 Y	Childhood	Childhood	Age 5.5 years, unrelated parents, no positive family history, normal echocardiography, normal abdominal ultrasonography, myogenic changes in EMG, elevated CPK (5100u/L) after fever , slightly elevated AST and ALT.	Negative	___	___	___	___	___	___	___	___	___	Sporadic	___	___	___	Negative	___	2023-12-05	No	___	___
Case395	109424	Metabolic myopathy	Solo	whole exome sequencing	No	Positive	Male	20 Y	Adulthood	Childhood	Onset from 3-month ago; Myalgia; Hypotonia, mild; Easy fatigability; Difficulty getting up from seated position & climbing steps; Unexplained weight loss; Hypoesthesia; EMG-NCV: distal & proximal polymyopathy with irritative feature; Elevated CPK; Muscle biopsy: fiber size variations.	Negative	___	___	___	___	___	___	___	___	___	Familial	___	___	___	Negative	___	2023-01-05	No	___	?
Case396	109442	Myopathy	Solo	whole exome sequencing	Yes	Negative	Female	38 Y	Adulthood	Adulthood	Onset age: 25-year; Frequent falls; Progressive muscular weakness, lower limbs; Waddling gait; Difficulty getting up from a seated position & climbing stairs; Wheelchair bound	Overlapping	DYSF	Stop gain	Known	Chr2:71730438C>T	Homozygote	NM_003494.4	c.331C>T	p.Gln111*	Miyoshi muscular dystrophy 1 [#MIM:254130]/AR; Muscular dystrophy, limb-girdle, autosomal recessive 2 [#MIM:253601]/AR; Myopathy, distal, with anterior tibial onset [#MIM:606768]/AR	Autosomal Recessive	Pathogenic	PVS1- PM2- PP5	Not checked	Positive	PMID:21522182, 18853459,26671124, 33613410,21522182	2023-05-21	No	___	SCV001755393
Case397	109511	CMS	Solo	whole exome sequencing	No	Positive	Male	44 Y	Adulthood	Adulthood	Onset age: 23-year; Bilateral ptosis, following renal transplantation; Weakness of facial musculature; Progressive external ophthalmoplegia; Dysphagia; Hand tremor; Gait disturbance; Muscle biopsy: slight neurogenic atrophy with denervation and reinnervation; EMG-NCV: axonal type sensorimotor polyneuropathy, with prominent involvement of facial muscles, and suspected myopathic process in proximal…	Negative	___	___	___	___	___	___	___	___	___	Familial	___	___	___	Negative	___	2023-05-20	No	___	___
Case398	109535	Congenital myotonia	Solo	whole exome sequencing	No	Negative	Male	15 Y	Childhood	Childhood	Myotonia; Difficulty walking; Anemia; Elevated CPK; EMG-NCV: myotonic pattern without myopathy, most compatible with myotonia congenita, probably Becker type.	Overlapping	CLCN1	Missense	Novel	Chr7:143029916C>T	Homozygote	NM_000083.3	c.1351C>T	p.His451Tyr	Myotonia congenita, dominant [#MIM160800]/AD; Myotonia congenita, recessive [#MIM255700]/AR; Myotonia levior, recessive	Autosomal Recessive	VUS	PM2	Not checked	VUS	___	2023-11-05	No	___	___
Case399	109617	SMA	Solo	whole exome sequencing	Yes	Positive	Female	14 Y	Childhood	Childhood	Consanguineous parents,two affected siblings, age of onset 12 years, unbalanced gait, hand tremor, learning impairment ,lack of concentration and movement regression , normal CPK, diffuse cerebellar atrophy in brain MRI, negative result for Pompe, neurogenic atrophy with denervation reinnervation process reported in muscle biopsy, motor neuron disease reported in EMG/NCV	Motor Neuron Disease	HEXB	Missense	Novel	Chr5:74016557G>A	Homozygote	NM_000521.4	c.1598G>A	p.Arg533His	Sandhoff disease, infantile, juvenile, and adult forms [#MIM:268800],AR	Autosomal Recessive	Pathogenic	PM2,PM5,PP3_strong,PP5_moderate	Not checked	Positive	___	2023-06-20	No	___	___
Case400	109672	Hereditary Neuropathy	Solo	whole exome sequencing	Yes	Negative	Male	39 Y	Adulthood	Adulthood	Onset age: 18-year old; Difficulty walking; Muscle weakness, lower >> upper, distal>proximal; Muscle atrophy, distal>proximal; Absent DTR; Thrombocytopenia since childhood; EMG-NCV: first result was in favor of chronic anterior horn cell disease (R/O SMA) and the second one revealed myopathic process; Muscle biopsy: inflammatory myopathy	Overlapping	DYSF	Splicing	Novel	Chr2:71896240A>G	Homozygote	NM_003494.4	c.5430-2A>G	___	Miyoshi muscular dystrophy 1 [#MIM:254130]/AR; Muscular dystrophy, limb-girdle, autosomal recessive 2 [#MIM:253601]/AR; Myopathy, distal, with anterior tibial onset [#MIM:606768]/AR	Autosomal Recessive	Pathogenic	PVS1-PM2-PP5	Not checked	Positive	___	2023-07-05	Quantitative analysis by Multiplex Ligation Dependent Probe Amplification (MLPA) for exons VII and VIII in SMN1 & SMN2 genes was previously performed in this laboratory for this individual, and revealed three copies of exons 7&8 in SMN1 gene.	___	___
Case401	109754	CMT	Solo	whole exome sequencing	Yes	Negative	Female	18 Y	Adulthood	Childhood	Onset age: 10-year; Distal muscle weakness, distal>proximal, upper>lower; Sensory impairment, distal; Pes cavus; Intrinsic hand muscle atrophy; Seizure (since 2-year old); Finger joint contracture; EMG-NCV: Sensorimotor, Peripheral neuropathy, mainly demyelinating type (R/O CMT); Abnormal EEG.	Neuropathies	MTMR2	Stop gain	Novel	Chr11:95580972G>T	Homozygote	NM_016156.6	c.1085C>A	p.Ser362*	Charcot-Marie-Tooth disease, type 4B1 [#MIM601382]/AR	Autosomal Recessive	Likely Pathogenic	PVS1(VS),PM2	Not checked	Positive	___	2023-06-05	No	___	___
Case402	109764	CMT	Solo	whole exome sequencing	Yes	Negative	Male	33 Y	Adulthood	Childhood	Consanguineous parents, sporadic case, age of onset 14 years, distal lower and less proximal muscle weakness, distal lower muscle atrophy, thenar muscle atrophy, pes cavus, chronic demyelinationg sensorimotor polyneuropathy reported in EMG/NCV, elevated CPK.	Neuropathies	PRX	Stop gain	Known	Chr19:40902224G>A	Homozygote	NM_181882.3	c.2035C>T	p.Arg679*	Charcot-Marie-Tooth disease, type 4F [#MIM614895] AR, Dejerine-Sottas disease [#MIM145900] AD, AR	Autosomal Recessive	VUS	PVS1(Strong),PM2(Supporting)	Not checked	VUS	PMID: 25628743	2023-06-22	Multiplex Ligation Dependent Probe Amplification (MLPA) screening for deletions and duplications in CMT/HNPP region was previously performed in this laboratory for this individual and revealed no Del/Dup in PMP22 gene of this individual.	___	___
Case403	109769	Myopathy	Solo	whole exome sequencing	No	Negative	Female	42 Y	Adulthood	Adulthood	Onset age: 35-year; Mild upper>lower limbs weakness; Shoulder girdle weakness; Axial weakness; Arrhythmia, conduction disorder; Elevated CPK; EMG-NCV: myopathy; Muscle biopsy: chronic myopathic atrophy with necrosis regeneration and prominent internalization of nuclei associated with multiple cox-negative fibers and rare rimmed vacuoles.	Overlapping	DES	Frameshift	Novel	Chr2:220286275delG	Heterozygote	NM_001927.4	c.1237delG	p.Glu413Argfs*34	Cardiomyopathy, dilated, 1I; #MIM604765/AD Myopathy, myofibrillar, 1; #MIM 601419/AD,AR Scapuloperoneal syndrome, neurogenic, Kaeser type; #MIM181400/AD	Autosoaml Dominant	Likely Pathogenic	PM2, PVS1	Not checked	Positive	___	2023-05-14	No	___	___
Case404	109784	Metabolic myopathy	Solo	whole exome sequencing	Yes	Negative	Female	49 Y	Adulthood	Not reported	Consanguineous parents, distal muscle weakness , walking and climbing difficulty, positive Gower’ s sign ,proximal muscle weakness started later,lordosis, myopathic atrophy with prominent fiber splitting and lysosomal vacuoles, negative enzyme assay for Pompe, inclusion body myositis reported in muscle biopsy, elevated CPK, elevated LDH,myopathic pattern with myotonic feature reported in EMG.	Negative	___	___	___	___	___	___	___	___	___	Sporadic	___	___	___	Negative	___	2023-08-06	No	___	___
Case405	109817	LGMD	Solo	whole exome sequencing	No	Negative	Female	25 Y	Adulthood	Childhood	Onset age: 5-6 years; Difficulty climbing steps & running; Decreased muscle force; Symmetric proximal limb muscle weakness; Skeletal muscle atrophy; Hip pain; Gowers sign; Gait disturbance; Muscle biopsy: myopathic atrophy, R/O muscular dystrophy; Femur & leg MRI: fatty atrophy & metaphyseal lesion, unilateral; Elevated CPK & Aldolase levels.	Dystrophies	CRPPA	Missense	Novel	Chr7:16460692T>C	Homozygote	NM_001101426.4	c.256A>G	p.Arg86Gly	Muscular dystrophy-dystroglycanopathy (congenital with brain and eye anomalies), type A, 7 [#MIM614643]/AR; Muscular dystrophy-dystroglycanopathy (limb-girdle), type C, 7 [#MIM616052]/AR	Autosomal Recessive	VUS	PP3,PM2	Inherited	VUS	___	2023-07-05	No	___	___
Case406	109829	LGMD	Solo	whole exome sequencing	Yes	Negative	Male	15 Y	Childhood	Childhood	Onset age: 5-month; Hypotonia; Retarded development; Intellectual disability, mild to moderate; Poor speech; Weakness of facial musculature; Generalized muscle weakness & amyotrophy; Scoliosis; Wheelchairbound; Increased CPK; Muscle biopsy: muscular dystrophy; EMG-NCV: proximal & distal polymyopathy; Brain MRI: Mega cisterna magna.	Dystrophies	POMT2	Missense	Novel	Chr14:77751848G>A	Homozygote	NM_013382.7	c.1460C>T	p.Ser487Phe	Muscular dystrophy-dystroglycanopathy (congenital with brain and eye anomalies), type A, 2 [#MIM613150]/AR; Muscular dystrophy-dystroglycanopathy (congenital with impaired intellectual development), type B, 2 [#MIM613156]/AR; Muscular dystrophy-dystroglycanopathy (limb-girdle), type C, 2 [#MIM613158]/AR	Autosomal Recessive	VUS	PP3,PM2	Not checked	VUS	___	2023-05-14	Targeted region Capture with Nimblegen chip in the DMD gene, followed by Next Generation Sequencing previously performed for this individual in the other genetic Laboratory and no any point mutation, small deletion or duplication was detected.	___	___
Case407	110103	Myopathy	Solo	whole exome sequencing	No	Positive	Male	37 Y	Adulthood	Adulthood	Onset at the age of 33-year; Axial muscle weakness; Lower limb muscle weakness, mild; Difficulty running & climbing stairs; Waddling gait; Elevated CPK & LDH; Muscle biopsy: slight myopathic atrophy with some necrotic and degenerative/regenerative fibers as well as mild focal endomysial fibrosis suggestive of muscular dystrophy; EMG-NCV: compatible with a mild non-irritable myopathic process.	Overlapping	RYR1	Missense	Novel	Chr19:38946144G>T	Heterozygote	NM_000540.3	c.1630G>T	p.Asp544Tyr	Congenital myopathy 1A, autosomal dominant, with susceptibility to malignant hyperthermia [#MIM:117000]/AD; Congenital myopathy 1B, autosomal recessive [#MIM:255320]/AR; King-Denborough syndrome [#MIM:619542]/AD; {Malignant hyperthermia susceptibility 1} [#MIM:145600]/AD	Autosoaml Dominant	Likely Pathogenic	PM1- PM2- PP3- Strong	Not checked	VUS	___	2023-10-07	No	___	___
Case408	110108	Myopathy	Solo	whole exome sequencing	No	Negative	Female	37 Y	Adulthood	Childhood	CDH, unilateral, since birth; Proximal muscle weakness, lower & upper, left>right; Skeletal muscle atrophy; Scoliosis; High palate; EMG-NCV: chronic myopathic process; Muscle biopsy: prominent type 1 fibers predominance and atrophy with intermyofibrillar network disruption and severe endomysial fibrosis as well as extensive adipose tissue replacement associated with rare degenerative fibers and s…	Dystrophies	COL6A1	Splicing	Known	Chr21:47409881C>T	Heterozygote	NM_001848.3	c.930+189C>T	___	Bethlem myopathy 1 [#MIM:158810]/AD, AR; Ullrich congenital muscular dystrophy 1 [#MIM:254090]/AD,AR	Autosoaml Dominant	Likely Pathogenic	PM2/PP5-strong/PS3	De novo	Positive	PMID: 28424332, 30895940	2023-11-06	No	___	___
Case409	110131	Myopathy	Solo	whole exome sequencing	No	Positive	Male	23 Y	Adulthood	Childhood	Neonatal hypotonia; Motor delay; Long face; High palate; Torticollis; Limb-girdle muscle weakness & atrophy, proximal>distal; Joint contracture; Flexion contracture; Joint laxity; Respiratory failure; Long fingers; EMG-NCV: old severe hereditary dystrophy myogenic process involving upper & lower limbs specially proximal lower limbs. Bethlem myopathy in DDx.	Dystrophies	COL6A2	Missense	Novel	Chr21:47533987G>T	Heterozygote	NM_001849.4	c.801G>T	p.Lys267Asn	Bethlem myopathy 1 [#MIM:158810]/AD, AR; ?Myosclerosis, congenital [#MIM:255600]/AR; Ullrich congenital muscular dystrophy 1 [#MIM:254090]/AD, AR	Autosoaml Dominant	VUS	PM2- PP3-PM5	Inherited	VUS	___	2023-06-06	No	___	___
Case410	110240	Motor neuron disease	Solo	whole exome sequencing	No	Negative	Female	43 Y	Adulthood	Adulthood	Sporadic case, started 4 years ago with muscle weakness, easy fatigability, thenar muscle atrophy, asymmetric distal (less proximal) upper and lower muscle weakness, anterior horn cell disease reported in EDX, negative MLPA for SMN	Negative	___	___	___	___	___	___	___	___	___	Sporadic	___	___	___	Negative	___	2024-08-11	Multiplex Ligation Dependent Probe Amplification (MLPA) screening for deletions of SMN1 gene was previously performed in this laboratory for this individual which revealed no deletion in this patient.	___	___
Case411	110244	Muscular dystrophy	Solo	whole exome sequencing	Yes	Negative	Female	20 Y	Adulthood	Not reported	Consanguineous parents, proximal muscle weakness in lower and upper extremities weelchair boundaries, not documented cardiac symptoms (20%), normal intelligence	Dystrophies	FKRP	Missense	Novel	Chr19:47259722C>G	Homozygote	NM_024301.5	c.1015C>G	p.Arg339Gly	Muscular dystrophy-dystroglycanopathy (limb-girdle), type C, 5 [#MIM607155] AR, Muscular dystrophy-dystroglycanopathy (congenital with brain and eye anomalies), type A, 5 [#MIM613153] AR, Muscular dystrophy-dystroglycanopathy (congenital with or without impaired intellectual development), type B, 5 [#MIM606612] AR	Autosomal Recessive	Likely Pathogenic	PM1,PM5,PP3,PP2	Inherited	Positive	___	2023-05-29	No	___	___
Case412	110357	Muscular dystrophy	Solo	whole exome sequencing	Yes	Positive	Female	38 Y	Adulthood	Adulthood	Onset at the age of 19-year old with inability to tip-toe walk & lower limbs muscle weakness (proximal & distal), extended to proximal upper limbs; Areflexia; EMG-NCV: myopathic process, suggestive of LGMD; Muscle biopsy: myopathic atrophy with necrotic and degenerative/regenerative fibers, mild focal endomysial fibrosis and some cox-negative fibers suggestive of muscular dystrophy; Elevated CPK …	Dystrophies	DYSF	Missense	Novel	Chr2:71839817T>A	Homozygote	NM_003494.4	c.4214T>A	p.Val1405Asp	Miyoshi muscular dystrophy 1 [#MIM:254130]/AR; Muscular dystrophy, limb-girdle, autosomal recessive 2 [#MIM:253601]/AR; Myopathy, distal, with anterior tibial onset [#MIM:606768]/AR	Autosomal Recessive	VUS	PP3/PM2	Not checked	VUS	___	2023-04-07	No	___	___
Case413	110373	NMD	Solo	whole exome sequencing	No	Negative	Male	28 Y	Adulthood	Childhood	Onset age: infancy; Muscle weakness, more prominent in lower limbs; Inability to walk; Hx of febrile seizures at the age of 1-2 years old. Non-consanguineous parents.	Motor Neuron Disease	BICD2	Frameshift	Novel	Chr9:95481205G>GCTGGTGCGGCCCCCGGGA	Heterozygote	NM_001003800.2	c.1704_1721dup	p.Gly570_Pro575dup	Spinal muscular atrophy, lower extremity-predominant, 2A, autosomal dominant [#MIM615290]/AD; Spinal muscular atrophy, lower extremity-predominant, 2B, autosomal dominant[#MIM618291]/AD	Autosoaml Dominant	VUS	PM2,PM4	Not checked	VUS	___	2023-11-11	No	___	___
Case414	110378	Metabolic myopathy	Solo	whole exome sequencing	Yes	Negative	Female	22 Y	Adulthood	Adulthood	Consanguineous parents, age of onset 18 years, muscle pain, easily fatigability, head drop, nausea, responsive to riboflavin ( vitamin B2) , elevated CPK,chronic myopathy reported in EMG , non singificant muscle fiber changes but increasing lipid content reported in muscle biopsy, elevated liver enzymes,negative for Pompe disease.	Myopathies	ETFDH	Missense	Known	Chr4:159624588T>C	Homozygote	NM_004453.4	c.1130T>C	p.Leu377Pro	Glutaric acidemia IIC [#MIM:231680],AR	Autosomal Recessive	Pathogenic	PM2-PP2-PP3-PP5	Not checked	Positive	PMID: 17412732, 29339009, 29376578, 31331668	2023-01-06	No	___	SCV001755408
Case415	110379	SMA	Solo	whole exome sequencing	Yes	Negative	Female	35 Y	Adulthood	Not reported	Onset age: 20-year old with lower limbs weakness; Spastic gait; Babinski sign; Increased DTR; EMG-NCV: neurogenic changes compatible with chronic anterior horn cell disease.	Hereditary Paraplegia	SPG7	Stop gain	Known	Chr16:89576947T>A	Homozygote	NM_003119.4	c.233T>A	p.Leu78*	Spastic paraplegia 7, autosomal recessive [#MIM:607259]/AD, AR	Autosomal Recessive	Pathogenic	PVS1- PP5-S	Not checked	Positive	PMID: 27084228	2023-06-15	Quantitative analysis by Multiplex Ligation Dependent Probe Amplification (MLPA) for exons VII and VIII in SMN1 gene was previously performed in this laboratory for this individual, and revealed two copies of exons 7&8 in SMN1 gene.	___	?
Case416	110495	Muscular dystrophy	Solo	whole exome sequencing	No	Negative	Male	18 Y	Adulthood	Not reported	Sporadic case, proximal muscle weakness, generalized proximal muscle atrophy.	Negative	___	___	___	___	___	___	___	___	___	Sporadic	___	___	___	Negative	___	2023-06-18	No	___	___
Case417	110543	CMS	Solo	whole exome sequencing	Yes	Negative	Male	10 Y	Childhood	Childhood	Age of onset 7 years, unilateral ptosis, muscle cramps, easily fatigability, acetylcoline receptor antibody (negative), enlarged thymus reported in CT scan, myasthenia syndrome reported in EMG/NCV reported.	Negative	___	___	___	___	___	___	___	___	___	Sporadic	___	___	___	Negative	___	2023-08-06	No	___	___
Case418	110606	ALS	Solo	whole exome sequencing	No	Negative	Male	52 Y	Adulthood	Not reported	Sporadic case, proximal and distal muscle weakness, fasciculation, spasticity, hyperreflexia, normal speech, normal intelligence, muscle cramps, no bulbar involvement, normal respiration, motor neuron disease reported in EMG, hyperdensity foci reported in brain MRI.	Motor Neuron Disease	TARDBP	Missense	Known	Chr1:11082409G>A	Heterozygote	NM_007375.4	c.943G>A	p.Ala315Thr	Amyotrophic lateral sclerosis 10, with or without FTD [#MIM:612069]/ AD; Frontotemporal lobar degeneration, TARDBP-related [#MIM:612069]/ AD	Autosoaml Dominant	Pathogenic	[PM1 PM2 PP5]+PP2??	Not checked	Positive	PMID: 18288693, 20031275, 25681989, 29411640	2023-06-06	No	___	___
Case419	110657	Myopathy	Solo	whole exome sequencing	No	Positive	Male	14 Y	Childhood	Childhood	Age 14 years, affected father, delayed motor development (walking 18 m), lower muscle weakness, joint hyper laxity and contracture, muscle cramps and fatigability, no kypho-scoliosis, negative Gower’ s sign, normal CPK, SMA type 3 reported in EMG, mild nonirritable myopathy reported in second EMG/NCV, pilar hyperkeratosis.	Negative	___	___	___	___	___	___	___	___	___	Familial	___	___	___	Negative	___	2023-07-06	No	___	___
Case420	110858	Hereditary Neuropathy	Solo	whole exome sequencing	No	Negative	Female	37 Y	Adulthood	Not reported	Onset age: 23-year old; Hands paresthesia, extended to lower limbs; Muscle spasm, lower limbs; Muscle weakness, very mild; Areflexia; Ataxia; Loss of vibratory sensation; EMG-NCV: compatible with chronic sensory >> motor polyneuropathy or neuropathy.	Negative	___	___	___	___	___	___	___	___	___	Sporadic	___	___	___	Negative	___	2023-06-06	No	___	___
Case421	110934	CMT	Solo	whole exome sequencing	Yes	Negative	Female	38 Y	Adulthood	Adulthood	Age of onset 31 years, consanguineous parents, climbing and walking difficulty, foot drop, stepped gait, bilateral sensory neural hearing imapairment, distal and less proximal muscle weakness in lower and less upper exterimities, sensory impairment, dysphagia, unilateral ptosis, pes cavus, chronic sensory motor demyelinating polyneuropathy reported in NCV.	Neuropathies	SH3TC2	Stop gain	Known	Chr5:148418039T>TA	Homozygote	NM_024577.4	c.819dup	p.Lys274*	Charcot-Marie-Tooth disease type 4C [#MIM 601596] AR, Mononeuropathy of the median nerve, mild [#MIM 613353] AD.	Autosomal Recessive	Pathogenic	PVS1(VS),PP5(VS),PM2(Supporting)	Not checked	Positive	PMID: 20220177, 27068304	2023-05-25	No	___	___
Case422	110976	Hereditary Neuropathy	Solo	whole exome sequencing	No	Positive	Female	58 Y	Adulthood	Adulthood	Distal muscle weakness, upper & lower, due to neuropathy; Foot dorsiflexor weakness; Maternal diabetes with onset at the age of 28-year; Spondylosis in thoracic, and lumbo-sacral spine MRI; EMG-NCV: possibility of chronic anterior horn cell disease; No parental consanguinity.	Motor Neuron Disease	HSPB1	Missense	Known	Chr7:75932279G>A	Heterozygote	NM_001540.5	c.250G>A	p.Gly84Arg	Charcot-Marie-Tooth disease, axonal, type 2F [#MIM:606595]/AD; Neuronopathy, distal hereditary motor, type IIB [#MIM:608634]/AD	Autosoaml Dominant	Likely Pathogenic	PM2/PP3/PP5/PS1/PM5?/PS3?	Not checked	Positive	PMID: 28379183, 2542991,21892769, 27816334,29240668, 29381233, 18952241, 32639100	2023-07-15	No	___	___
Case423	110988	LGMD	Solo	whole exome sequencing	Yes	Negative	Male	25 Y	Adulthood	Childhood	Onset age: 14-year old with Waddling gait; Ptosis; Bulbar palsy; Lower limbs muscle weakness; Symmetrical proximal & distal muscle atrophy; Lordosis; Difficulty running; Gowers sign; EMG-NCV: myopathic pattern; Muscle biopsy: some moth-eaten fibers & dispersed angular atrophic and some degenerative fibers with no fiber type grouping; Hx of hypoparathyroidism, seizures & vitiligo.	Negative	___	___	___	___	___	___	___	___	___	Sporadic	___	___	___	Negative	___	2023-06-20	No	___	___
Case424	111021	CMS	Solo	whole exome sequencing	Yes	Positive	Male	62 Y	Adulthood	Adulthood	Bilateral ptosis; Respiratory insufficiency; Scoliosis; Thymus hyperplasia; Pulmonic infiltration, chronic; Thorax deformity; Chest CT: ankylosis of thoracic spine suggestive of seronegative spondyloarthropathies; Elevated AST & ALT; Negative anti-acetylcholine receptor (AChR) antibody; EMG-NCV: positive 3Hz RNS.	Neuromuscular junction disorders	COL13A1	Frameshift	Novel	Chr10:71640302GC>G	Homozygote	NM_001130103.2	c.485delC	p.Pro162Leufs*33	Myasthenic syndrome, congenital, 19 [#MIM:616720]/AR	Autosomal Recessive	Likely Pathogenic	PVS1- PM2	Not checked	Positive	___	2023-05-28	No	___	___
Case425	111113	Muscular dystrophy	Solo	whole exome sequencing	No	Negative	Male	24 Y	Adulthood	Childhood	Sporadic case, started 9 years with walking difficulty and frequent falling, muscle weakness and atrophy, hand and foot deformity, positive Gowers sign , wheelchair boundaries and abnormal ECG	Dystrophies	DMD	Frameshift	Novel	chrX:32398774CA>C	Hemizygote	NM_004006.3	c.4697del	(p.Leu1566Trpfs*5)	Becker muscular dystrophy [#MIM:300376]/XLR; Cardiomyopathy, dilated, 3B [#MIM:302045]/XL; Duchenne muscular dystrophy [#MIM:310200]/XLR	X-linked	Pathogenic	(PVS1,PM2,PP5)	Not checked	Positive	___	2024-08-04	Multiplex Ligation Dependent Probe Amplification (MLPA) screening for deletions and duplications in Dystrophin gene was previously performed in this laboratory for this individual which revealed no Del/Dup in this patient.	___	___
Case426	111191	CMS	Solo	whole exome sequencing	No	Negative	Male	37 Y	Adulthood	Adulthood	Onset age: 24-year; Ptosis, bilateral.	Neuropathies	DHTKD1	Splicing	Novel	Chr10:12139996G>A	Heterozygote	NM_018706.7	c.1671+1G>A	___	?Charcot-Marie-Tooth disease, axonal, type 2Q; #MIM 615025/AD Alpha-aminoadipic and alpha-ketoadipic aciduria;m #MIM 204750/AR	Autosoaml Dominant	Likely Pathogenic	PM2, PVS1	Not checked	Unclear	___	2023-05-14	No	___	___
Case427	111260	LGMD	Solo	whole exome sequencing	Yes	Negative	Male	16 Y	Childhood	Childhood	Consanguineous parents, sporadic case, age of onset 7 years, started with lower proximal muscle weakness, tip toe walking, mild scoliosis, upper proximal weakness, positive Gower’s sign, myopathy (DMD/BMD) reported in EMG/NCV, muscular dystrophy reported in muscle biopsy, significantly elevated CPK, normal echocardiography, negative MLPA result for DMD/BMD.	Dystrophies	SGCD	Frameshift	Novel	Chr5:156186379TA>T	Homozygote	NM_000337.6	c.854del	p.Asn285Thrfs*53	Muscular dystrophy, limb-girdle, autosomal recessive 6 [#MIM601287] AR, Cardiomyopathy, dilated, 1L [#MIM606685]	Autosomal Recessive	VUS	PVS1(Moderate),PM2	Inherited	VUS	___	2023-06-24	Multiplex Ligation Dependent Probe Amplification (MLPA) screening for deletions and duplications in Dystrophin gene was previously performed in the Special Medical Center for this individual which revealed no Del/Dup in this patient.	___	___
Case428	111273	LGMD	Solo	whole exome sequencing	No	Negative	Male	33 Y	Adulthood	Childhood	Sporadic case, age of onset 4 years, proximal lower and upper muscle weakness, positive Gower's sign, calf hypertrophy and generalized myopathy reported in EMG	Dystrophies	DMD	Frameshift	Novel	chrX:32466726TTC>T	Hemizygote	NM_004006.3	c.3631_3632delGA	p.Glu1211Serfs*8	Becker muscular dystrophy [#MIM:300376]/XLR; Cardiomyopathy, dilated, 3B [#MIM:302045]/XL; Duchenne muscular dystrophy [#MIM:310200]/XLR	X-linked	Likely Pathogenic	PVS1, PM2	Not checked	Positive	___	2024-03-16	No	___	___
Case429	111313	Myotonia	Solo	whole exome sequencing	No	Negative	Female	27 Y	Adulthood	Childhood	Onset age: 4-5 years old; Short chin & Full cheeks; Sad, fixed facies; Skeletal muscle atrophy; Muscle weakness, mild; Pes planus; EMG-NCV: Complex repetitive discharges (CRDs) in most tested muscle, myokymia in mentalis & mild myopathic process were detected.	Myotonic syndrome	HSPG2	Splicing	Novel	Chr1:22181103C>T	Heterozygote	NM_005529.7	c.6288+1G>A		Dyssegmental dysplasia, Silverman-Handmaker type [#MIM:224410]/AR; Schwartz-Jampel syndrome, type 1 [#MIM:255800]/AR	Autosomal Recessive	Likely Pathogenic	PVS1_very strong,PM2	Not checked	Unclear	___	2023-08-07	No	___	___
Case430	111438	SMA	Solo	whole exome sequencing	No	Negative	Male	38 Y	Adulthood	Childhood	Onset age: 17-year old; Upper & lower muscle weakness & atrophy due to neuropathy, proximal>distal, upper>lower; Claw hand; Inability to tip-toe & heel walk; Decreased DTR; EMG-NCV: compatible with chronic motor neuropathy/neuronopathy with prominent active denervation in limb muscles. No parental consanguinity & absence of family history.	Negative	___	___	___	___	___	___	___	___	___	Sporadic	___	___	___	Negative	___	2023-07-23	Quantitative analysis by Multiplex Ligation Dependent Probe Amplification (MLPA) for exons VII and VIII in SMN1 & SMN2 genes was previously performed in this laboratory for this individual, and revealed two copies of exons 7&8 in SMN1 gene.	___	___
Case431	111477	ALS	Solo	whole exome sequencing	No	Negative	Female	59 Y	Adulthood	Not reported	NA	Hereditary Ataxia	SAMD9L	Stop gain	Novel	Chr7:92762803G>A	Heterozygote	NM_152703.5	c.2482C>T	p.Arg828*	Spinocerebellar ataxia 49 [#MIM619806] AD, Ataxia-pancytopenia syndrome [#MIM159550] AD, Monosomy 7 myelodysplasia and leukemia syndrome 1 [#MIM252270] AD	Autosoaml Dominant	Likely Pathogenic	PVS1(Very Strong),PM	Not checked	Positive	___	2023-06-25	No	___	___
Case432	111605	CMS	Solo	whole exome sequencing	No	Negative	Male	6 Y	Childhood	Childhood	Ptosis, since 14-month age; Negative anti-MuSK antibody test; Abnormal jitter analysis.	Overlapping	MYBPC1	Large CNV duplication	Novel	Chr12:102071010-102071174	___	NM_002465.4	Exon 27	___	Arthrogryposis, distal, type 1B; #MIM 614335/AD Congenital myopathy 16; #MIM618524/AD Lethal congenital contracture syndrome 4; #MIM614915/AR	___	VUS	CNV	Not checked	VUS	___	2023-08-26	No	No	___
Case433	111617	Hereditary ataxia	Solo	whole exome sequencing	Yes	Negative	Female	22 Y	Adulthood	Childhood	Onset age: 17-18 years old; Postural instability; Dysarthria; Muscle weakness, lower>upper, proximal>distal; Spasticity; Brain MRI: non specific deep white matter foci in periventricular area and centrum semiovale with long TR sequence.	Negative	___	___	___	___	___	___	___	___	___	Sporadic	___	___	___	Negative	___	2023-07-20	No	___	___
Case434	111659	Myopathy	Solo	whole exome sequencing	No	Negative	Female	54 Y	Adulthood	Adulthood	Age 54 years, sporadic case , lower proximal muscle weakness started 6 years ago, recurrent fracture left ankle, normal upper muscle forces, climbing ,walking and running difficulty, positive Gower’s sign ,foot drop , atrophy and fat replacement of anterior muscle compartment thights and posterior compartments of legs reported in muscle MRIof lower extremities ,chronic irritable myopathic process…	Negative	___	___	___	___	___	___	___	___	___	Sporadic	___	___	___	Negative	___	2023-04-07	No	___	___
Case435	111707	CMT	Solo	whole exome sequencing	No	Positive	Male	23 Y	Adulthood	Childhood	Onset at the age 15-year with lower limb neuropathy, distal; Hand tremor; Lower muscle weakness, due to neuropathy; Difficulty to walk on heels & tip-toes; EMG-NCV: compatible with chronic axonal sensorimotor polyneuropathy. No parental consanguinity, in the presence of family history suspected genetic etiology.	Overlapping	KIF5A	Inframe deletion	Known	Chr12:57962795TCAA>T	Heterozygote	NM_004984.4	c.768_770delCAA	p.Asn256del	Myoclonus, intractable, neonatal [#MIM:617235]/AD;Spastic paraplegia 10, autosomal dominant [#MIM:604187]/AD;{Amyotrophic lateral sclerosis, susceptibility to, 25} [#MIM:617921]/AD	Autosoaml Dominant	VUS	PM1-PM2-PM4	Not checked	VUS	PMID: 18245137	2023-07-18	No	___	___
Case436	111714	Congenital myopathy	Solo	whole exome sequencing	Yes	Positive	Male	3 Y	Childhood	Childhood	Consanguineous parents, psychomotor delay, speech delay,congenital myopathy, walking inability, no microcephaly.	Negative	___	___	___	___	___	___	___	___	___	Familial	___	___	___	Negative	___	2023-07-17	No	___	___
Case437	111717	CMT	Solo	whole exome sequencing	Yes	Positive	Female	21 Y	Adulthood	Childhood	Consanguineous parents, two affected siblings, age 22 years, low birth weight , intellectual disability, speech delay, distal upper and lower muscle atrophy, frequent falling , wheelchair boundaries, hereditary myopathy in EMG, symmetric severe axonal motor polyneuropathy in NCV, normal EEG.	Hereditary Paraplegia	AMPD2	Missense	Novel	Chr1:110173584G>C	Homozygote	NM_004037.9	c.2288G>C	p.Gly763Ala	?Spastic paraplegia 63 [#MIM:615686],AR; Pontocerebellar hypoplasia, type 9 [#MIM:615809],AR	Autosomal Recessive	VUS	PM2-PP3	Not checked	VUS	___	2023-07-13	No	___	___
Case438	111771	CMT	Solo	whole exome sequencing	No	Negative	Female	57 Y	Adulthood	Adulthood	Sporadic case, age of onset 37 years, started with muscle pain during sitting, paresthesia in lower limbs, foot drop, pes cavus, distal lower > upper muscle weakness, hammer toes, less proximal muscle weakness, chronic demyelinating(axonal ?) sensorimotor polyneuropathy reported in NCV, normal CPK.	Neuropathies	KIF1B	Missense	Novel	Chr1:10435075T>G	Heterozygote	NM_001365951.3	c.5260T>G	p.Tyr1754Asp	Charcot-Marie-Tooth disease, type 2A1 [#MIM118210] AD, {Neuroblastoma, susceptibility to, 1} [#MIM256700] AD, SMu	Autosoaml Dominant	VUS	PM2,PP3,PP2(supporting)	Not checked	VUS	___	2023-07-15	No	___	___
Case439	111774	Hereditary Neuropathy	Solo	whole exome sequencing	Yes	Negative	Male	33 Y	Adulthood	Childhood	Onset: 12-year old with difficulty walking; Upper & lower limbs muscle weakness, progressive, distal>proximal; Atrophy of thenar, hypothenar & below knees muscles; Atrophy of calf muscles; Contractures of fingers; Paresthesia, lower limbs, distal>proximal; EDX: chronic severe motor neuron disease.	Negative	___	___	___	___	___	___	___	___	___	Sporadic	___	___	___	Negative	___	2023-01-07	No	___	___
Case440	111775	Muscular dystrophy	Solo	whole exome sequencing	No	Positive	Male	65 Y	Adulthood	Adulthood	Sporadic case, muscle weakness started in 50 years, sitting, standing and walking difficulty, no facial muscle weakness, CPK:247U/L, muscular dystrophy reported in muscle biopsy, thigh and gastrocnemius atrophy reported in muscle MRI, sacrolemal labelling for seven antibodies reported in IHC, chronic myopathic process with active denervation reported in EMG.	Myopathies	DNM2	Missense	Known	Chr19:10922947G>A	Heterozygote	NM_001005361.3	c.1565G>A	p.Arg522His	Myopathy, Centronuclear1 [#MIM160150] AD, Charcot-Marie-Tooth Disease, axonal type 2M [#MIM606482] AD, Charcot-Marie-Tooth disease, dominant intermediate B [#MIM606482] AD and Lethal congenital contracture syndrome 5 [#MIM615368] AR.	Autosoaml Dominant	Pathogenic	PP5,PM5,PP3,PM2,PM1	Inherited	Positive	PMID: 20227276, 22396310, 24465259, 25501959, 25957634, 26908122	2023-06-19	No	___	___
Case441	111829	Hereditary Neuropathy	Solo	whole exome sequencing	No	Positive	Female	68 Y	Adulthood	Adulthood	Onset age: 66.5-year old; Lower muscle spasm; Distal upper muscle weakness due to neuropathy; Mild proximal muscle weakness due to neuropathy; Foot drop; Inability to heel walk; EMG-NCV: Hereditary neuropathy with liability to pressure palsies.	Neuropathies	PMP22	Missense	Novel	Chr17:15162411C>T	Heterozygote	NM_000304.4	c.178G>A	p.Glu60Lys	?Neuropathy, inflammatory demyelinating [#MIM:139393]/?AD; Charcot-Marie-Tooth disease, type 1A [#MIM:118220]/AD; Charcot-Marie-Tooth disease, type 1E [#MIM:118300]/AD; Dejerine-Sottas disease [#MIM:145900]/AD, AR; Neuropathy, recurrent, with pressure palsies [#MIM:162500]/AD; Roussy-Levy syndrome [#MIM:180800]/AD	Autosoaml Dominant	VUS	PM2,PP3	Not checked	VUS	___	2023-06-20	Multiplex Ligation Dependent Probe Amplification (MLPA) screening for deletions and duplications in CMT/HNPP region was previously performed in Firoozgar Hospital for this individual and revealed no Del/Dup in PMP22 gene of this individual.	___	___
Case442	111941	Hereditary paraplagia	Solo	whole exome sequencing	No	Positive	Male	53 Y	Adulthood	Adulthood	Age 54 years, two affected indivituals, age of onset 5 years earlier, upper and lower muscle weakness, neuropathy, paraparesis, spasticity, neck pain, foot drop, wheelchair boundaries, normal EMG/NCV, mild degeneration in spinal MRI, normal echocardiography.	Negative	___	___	___	___	___	___	___	___	___	Familial	___	___	___	Negative	___	2023-03-07	No	___	___
Case443	111969	Mitochondrial myopathy	Solo	whole exome sequencing	Yes	Negative	Female	24 Y	Adulthood	Childhood	Onset age: 14 years old; Ptosis; Facial weakness; Proximal muscle weakness & wasting; Decreased muscle force; EMG-NCV: mild myopathic process; Muscle biopsy: suggestive of mitochondrial myopathy.	Overlapping	TTN	Large CNV deletion	Novel	Chr2:179659646-179659981	___	NM_001267550.2	Exon 7	___	Cardiomyopathy, dilated, 1G; #MIM 604145/AD Cardiomyopathy, familial hypertrophic, 9; #MIM 613765/AD Congenital myopathy 5 with cardiomyopathy; #MIM 611705/AR Muscular dystrophy, limb-girdle, autosomal recessive 10; #MIM 608807/AR Myopathy, myofibrillar, 9, with early respiratory failure; #MIM 603689/AD Tibial muscular dystrophy, tardive; #MIM 600334/AD	___	Likely Pathogenic	___	Not checked	VUS	___	2023-06-06	No	No	___
Case444	112021	Mitochondrial disease	Solo	whole exome sequencing	No	Negative	Male	10 Y	Childhood	Childhood	Onset age: 3-year old; Stroke-like episodes; Rigidity; Spasticity; Hyperammonemia; Elevated lactate level; Ataxia; Hypotonia; Hemiparesis, Rt. side.	Neuropathies	POLR3B	Missense	Known	Chr12:106850925G>A	Heterozygote	NM_018082.6	c.2303G>A	p.Arg768His	Charcot-Marie-Tooth disease, demyelinating, type 1I; #MIM 619742/AD Leukodystrophy, hypomyelinating, 8, with or without oligodontia and/or hypogonadotropic hypogonadism; #MIM614381/AR	Autosoaml Dominant	Likely Pathogenic	PP2, PP3, PP5, PM5, PP1	Not checked	Positive	PMID: 22036171, 32180488	2023-06-06	No	___	___
Case445	112044	Hereditary Neuropathy	Solo	whole exome sequencing	No	Negative	Female	33 Y	Adulthood	Adulthood	Hx of Multiple Sclerosis since 9-year ago; Sensory neuropathy, distal limbs, since 5-year ago; Lower muscle weakness, distal due to neuropathy; Muscle cramp; Foot drop; EMG-NCV: sensory polyneuropathy/ganglinopathy.	Negative	___	___	___	___	___	___	___	___	___	Sporadic	___	___	___	Negative	___	2023-01-07	No	___	___
Case446	112049	LGMD	Solo	whole exome sequencing	Yes	Positive	Female	22 Y	Adulthood	Childhood	Consanguineous parents, two affected siblings, muscle weakness and elevated liver enzymes started at age 8-10 years, proximal>distal muscles in upper and lower extremities involved, wheelchair boundaries, elevated CPK, mild MR in echocardiography, myopathic changes with possibility of LGMD reported in EMG, negative result for Pompe disease, negative MLPA for DMD, heterozygote varaint in GAA gene …	Dystrophies	SGCB	Large CNV deletion	Known	NC_000002.11:g.(?_52899589)_(52899809_?)del	___	NM_000232.5	Exon 2	___	Muscular dystrophy, limb-girdle, autosomal recessive 4 [#MIM604286] AR	___	Likely Pathogenic	CNV	Not checked	Positive	PMID:28883879,28687063	2023-05-08	Multiplex Ligation Dependent Probe Amplification (MLPA) screening for deletions and duplications in Dystrophin gene was previously performed in this laboratory for this individual which revealed no Del/Dup in this patient.	No	___
Case447	112058	Hereditary Neuropathy	Solo	whole exome sequencing	Yes	Negative	Male	14 Y	Childhood	Childhood	Consanguineous parents, sporadic case, distal muscle pain and neuropathy, started very recently, axonal motor neuropathy reported in EMG/NCV, normal echocardiography, normal cervical , thoracic and brain MRI.	Negative	___	___	___	___	___	___	___	___	___	Sporadic	___	___	___	Negative	___	2023-10-07	No	___	___
Case448	112081	CMT	Solo	whole exome sequencing	Yes	Negative	Male	22 Y	Adulthood	Not reported	Distal lower muscle weakness due to neuropathy; Pes cavus; No ability to heel & toe walking; Delayed walking; Abnormal gait, imbalance; Sensory Ataxia; EMG-NCV: chronic demyelinating sensorimotor polyneuropathy with uniform conduction slowing; Urine protein electrophoresis: mixed tubular and glomerular proteinuria.	Overlapping	SACS	Splicing	Novel	Chr13:23915832G>C	Homozygote	NM_014363.6	c.2186-3C>G	___	Spastic ataxia, Charlevoix-Saguenay type [#MIM:270550]/AR	Autosomal Recessive	VUS	PM2_Moderate/PP3_Moderate	Not checked	VUS	___	2023-09-26	Multiplex Ligation Dependent Probe Amplification (MLPA) screening for deletions and duplications in CMT/HNPP region was previously performed in this laboratory for this individual and revealed no Del/Dup in PMP22 gene of this individual.	___	___
Case449	112232	Metabolic myopathy	Solo	whole exome sequencing	Yes	Negative	Female	45 Y	Adulthood	Childhood	Onset age: 3-year old; Difficulty climbing steps; Muscle spasm; Respiratory muscle weakness; Gowers sign; EMG-NCV: suggestive of myotonic myopathy, R/O chronic myositis; Elevated CPK, LDH & Aldolase levels; Muscle biopsy: myopathic atrophy with some necrotic and degenerative/regenerative fibers and some small foci of perivascular chronic inflammation; IHC: gamma sarcoglycan with weak sarcolemmal …	Myopathies	RYR3	Missense	Known	Chr15:34064243G>T	Homozygote	NM_001036.6	c.8939G>T	p.Arg2980Leu	Congenital myopathy 20 [#MIM:620310]/AR	Autosomal Recessive	VUS	PM2/PP3/PM3	Not checked	VUS	PMID:29498452, 31230720	2023-07-23	No	___	___
Case450	112242	Metabolic myopathy	Solo	whole exome sequencing	Yes	Negative	Female	19 Y	Adulthood	Childhood	Onset at the age of 14-year old with lower muscle weakness & wasting; Upper & lower muscle weakness, proximal; Muscle pain in lower limbs; Difficulty climbing steps; Nasal speech; Head drop.	Myopathies	ETFDH	Missense	Known	Chr4:159629524G>A	Homozygote	NM_004453.4	c.1699G>A	p.Glu567Lys	Glutaric acidemia IIC [#MIM:231680]/AR	Autosomal Recessive	Likely Pathogenic	PP3-STRONG- PM2- PP2	Inherited	Positive	PMID: 36654993,32007756	2023-01-07	No	___	___
Case451	112504	LGMD	Solo	whole exome sequencing	Yes	Positive	Female	14 Y	Childhood	Childhood	Onset: 13-year old; Lower & upper muscle weakness, proximal; Lordosis; Foot dorsiflexor weakness; Abnormal gait (Waddling gait); Gowers sign; Decreased muscle force; Elevated CPK; Muscle biopsy: muscular dystrophy; EMG-NCV: myopathic process. There is history of similar diseases in the family of this individual’s consanguineous parents.	Dystrophies	CAPN3	Stop gain	Known	Chr15:42695066C>A	Homozygote	NM_000070.3	c.1611C>A	p.Tyr537*	Muscular dystrophy, limb-girdle, autosomal dominant 4 [#MIM:618129]/AD; Muscular dystrophy, limb-girdle, autosomal recessive 1 [#MIM:253600]/AR	Autosomal Recessive	Pathogenic	PVS1_very strong,PM2,PP5	Not checked	Positive	PMID: 9150160, 16100770, 31410652, 33304817	2023-07-20	No	___	SCV001755305
Case452	112553	Hereditary paraplagia	Solo	whole exome sequencing	Yes	Negative	Female	20 Y	Adulthood	Childhood	Delayed speech; Hypertelorism; Upper limb muscle weakness; Spasticity; Difficulty rising from seated position; Gait disturbance; Waddling gait; Pes planus, bilateral; Short stature; FTT; EMG-NCV: chronic neurogenic changes, lower>upper limbs with mild spontaneous activity in some examined muscles in favor of chronic anterior horn cell damages, additionally, hereditary spastic paraparesis & other …	Motor Neuron Disease	SPG11	Frameshift	Known	Chr15:44905697C>CT	Homozygote	NM_025137.3	c.3075dupA	p.Glu1026Argfs*4	Amyotrophic lateral sclerosis 5, juvenile [MIM#602099]/AR; Charcot-Marie-Tooth disease, axonal, type 2X [MIM#616668]/AR; Spastic paraplegia 11, autosomal recessive [MIM#604360]/AR	Autosomal Recessive	Pathogenic	PVS1- PP5- PM2	Not checked	Positive	PMID: 27084228, PMID: 20110243	2023-07-30	No	___	SCV001755384
Case453	112555	Myopathy	Solo	whole exome sequencing	Yes	Positive	Male	7 M	Childhood	Childhood	Consanguineous parents, hypotonia, age at examination 8months, OFC:47cm, elevated CPK, congenital myopathy reported in EMG.	Dystrophies	LAMA2	Stop gain	Known	Chr6:129807679C>T	Homozygote	NM_000426.4	c.7810C>T	p.Arg2604Ter	Muscular dystrophy, congenital, merosin deficient or partially deficient [#MIM:607855]/ AR; Muscular dystrophy, limb-girdle, autosomal recessive 23 [#MIM:618138]/ AR	Autosomal Recessive	Pathogenic	___	Not checked	Positive	PMID: 24611677, 30301903	2023-07-15	No	___	___
Case454	112760	Muscular dystrophy	Solo	whole exome sequencing	Yes	Negative	Male	25 Y	Adulthood	Childhood	Delayed ability to walk; Lower muscle wasting, since childhood; Proximal muscle weakness, lower limbs, gradually extended to upper limbs; Hyperlordosis; Waddling gait; Gowers sign; EMG-NCV: myogenic process, limb-girdle muscular dystrophy; Muscle biopsy: compatible with muscular dystrophy with prominent intermyofibrillar network disruption as multiple core-like lesions and secondary neurogenic ch…	Dystrophies	POGLUT1	Missense	Novel	Chr3:119190271C>T	Homozygote	NM_152305.3	c.292C>T	c.292C>T	Dowling-Degos disease 4 [#MIM:615696]/AD; Muscular dystrophy, limb-girdle, autosomal recessive 21 [#MIM:617232]/AR	Autosomal Recessive	Likely Pathogenic	PM2-moderate/PS3-strong/PP5/PP3?	Not checked	Positive	___	2023-08-16	No	___	___
Case455	112776	Hereditary paraplagia	Solo	whole exome sequencing	Yes	Positive	Female	17 Y	Childhood	Childhood	Consanguineous parents, two affected siblings, age of onset 11 years , spastic gait , frequent falling, lower limb spasticity and weakness,pes cavus, dysarthria, shortening achill tendon (releasing in age 13 years) chronic neurogenic changes in lower limb with possible mild anterior horn cell disease reported in EMG/NCV ,brain MRI normal( mild asymmetric right ventricle dilation as a normal varia…	Hereditary Paraplegia	C19orf12	Frameshift	Known	Chr19:30193878G>GC	Homozygote	NM_001031726.4	c.166dup	p.Ala56Glyfs*16	?Spastic paraplegia 43, autosomal recessive [#MIM:615043]/ AR; Neurodegeneration with brain iron accumulation 4 [#MIM:614298]/ AD, AR	Autosomal Recessive	VUS	[PVS1-moderate PM2]+PM1-supporting??	Inherited	VUS	PMID: 23166001	2023-07-23	No	___	___
Case456	112836	FSHD	Solo	whole exome sequencing	No	Negative	Female	22 Y	Adulthood	Adulthood	Sporadic case, age 22 years old, started 3 years ago with asymmetric scapular winging,easy fatigability, normal CPK, mild myopathic process reported in EDX, mitral valve prolaps reported in echocardiography.	Negative	___	___	___	___	___	___	___	___	___	Sporadic	___	___	___	Negative	___	2024-08-05	___	___	___
Case457	112868	Motor neuron disease	Solo	whole exome sequencing	Yes	Negative	Male	45 Y	Adulthood	Not reported	Sporadic case, 45 years, age of onset 42 years,unbalanced gait, hyporeflexia, distal lower muscle weakness, relatively atrophy of thenar,hypothenar, no pes cavus, thumb numbness, distal neuropathy and proneal neurogenic pattern reported in EMG/NCV,L3-S1 radiculopathy in NCV/EMG.	Negative	___	___	___	___	___	___	___	___	___	Sporadic	___	___	___	Negative	___	2023-07-25	No	___	___
Case458	112990	SMA	Solo	whole exome sequencing	Yes	Negative	Male	17 Y	Childhood	Childhood	Onset age: 12-year old; Foot dorsiflexor weakness; Lower limbs weakness, distal>proximal; EMG-NCVs: results from two distinct EDXs were suggestive of anterior horn cell disorder and scapuloproneal spinal muscular atrophy or scapuloproneal dystrophy; Elevated CPK & Aldolase levels.	Negative	___	___	___	___	___	___	___	___	___	Sporadic	___	___	___	Negative	___	2023-11-08	No	___	___
Case459	113065	Hereditary Neuropathy	Solo	whole exome sequencing	No	Positive	Female	45 Y	Adulthood	Adulthood	Autosomal dominant pattern, age of onset 42 years, lower and upper muscle pain and weakness, calf atrophy, thenar atrophy, running difficulty, neurogenic pattern and possible HMN reported in EMG/NCV.	Motor Neuron Disease	BSCL2	Missense	Known	Chr11:62469965G>C	Heterozygote	NM_032667.6	c.269C>G	p.Ser90Trp	Encephalopathy, progressive, with or without lipodystrophy [#MIM:615924],AR; Lipodystrophy, congenital generalized, type 2 [#MIM:269700],AR; Neuropathy, distal hereditary motor, type VC [#MIM:619112],AD; Silver spastic paraplegia syndrome [#MIM:270685],AD	Autosoaml Dominant	Pathogenic	PP5_strong, PM2_moderate, PP3_moderate, PM1_supporting, PM5_supporting,	Not checked	Positive	PMID: 26815532, 35922214, 23142943, 29269637, 29336362	2023-07-31	No	___	___
Case460	113105	Myopathy	Solo	whole exome sequencing	Yes	Negative	Male	29 Y	Adulthood	Childhood	Consanguineous parents, age of onset 9 years, proximal lower and less upper muscle weakness, positive Gower’s sign, climbing ,walking and running difficulty, elevated CPK, proximal and distal myopathy reported in EMG ,rimmed vacuole myopathy rule out GNE reported in muscle biopsy ,normal echocardiography.	Negative	___	___	___	___	___	___	___	___	___	Sporadic	___	___	___	Negative	___	2023-09-26	Multiplex Ligation Dependent Probe Amplification (MLPA) screening for deletions and duplications in DMD gene was previously performed in this laboratory for this individual which revealed no Del/Dup in this patient.	___	___
Case461	113113	Mitochondrial myopathy	Solo	whole exome sequencing	Yes	Negative	Male	46 Y	Adulthood	Childhood	Consanguineous parents, started 17 years old with proximal muscle weakness, facial muscle weakness, bilateral ptosis, muscle cramps, mitochondrial myopathy reported in muscle biopsy,elevated CPK, myopathy disorder reported in EMG, negative MUSK and acethylcoline receptor antibodies.	Negative	___	___	___	___	___	___	___	___	___	Sporadic	___	___	___	Negative	___	2024-07-01	No	___	___
Case462	113240	SMA	Solo	whole exome sequencing	Yes	Positive	Female	33 Y	Adulthood	Adulthood	Onset age: 23-year old; Difficulty rising from seated position & climbing steps; Proximal muscle weakness, upper & lower limbs, progressive; Muscle atrophy of upper & lower limbs; EDX: compatible with chronic anterior horn cell disease.	Negative	___	___	___	___	___	___	___	___	___	Familial	___	___	___	Negative	___	2023-11-18	Multiplex Ligation Dependent Probe Amplification (MLPA) screening for deletions of SMN1 gene was previously performed in this laboratory for this individual which revealed no deletion in this patient.	___	___
Case463	113247	Hereditary paraplagia	Solo	whole exome sequencing	Yes	Negative	Male	26 Y	Adulthood	Childhood	Consanguineous parents, sporadic case, mild motor delay, movement impairment started at age t 13 years, climbing and standing difficulty, spastic gait, seizure, learning impairement, mild intellectual disability, bilateral shortening Aschilles tendons (released by surgery ), mild brain atrophy and mild periventricular hyper signal reported in brain MRI, neurogenic pattern in favor of anterior hor…	Hereditary Paraplegia	ZFYVE26	Frameshift	Novel	Chr14:68234529AG>A	Homozygote	NM_015346.4	c.5681del	p.Pro1894Leufs*7	Spastic paraplegia 15, autosomal recessive [#MIM270700] AR	Autosomal Recessive	Likely Pathogenic	PVS1(VS),PM2(M)	Not checked	Positive	___	2023-02-08	No	___	___
Case464	113249	CMT	Solo	whole exome sequencing	Yes	Positive	Female	44 Y	Adulthood	Adulthood	Onset age: 36-year old; Hypoesthesia & Paresthesia, feet & hands; Sensory involvement, distal>proximal, lower>upper; Foot dorsiflexor weakness; Muscle atrophy in lower limbs & hand muscles; EMG-NCV: chronic axonal motor > sensory polyneuropathy.	Overlapping	MME	Missense	Known	Chr3:154834512T>A	Homozygote	NM_007289.4	c.499T>A	p.Trp167Arg	?Spinocerebellar ataxia 43 [#MIM:617018]/AD; Charcot-Marie-Tooth disease, axonal, type 2T [#MIM:617017]/AD, AR	Autosomal Recessive	VUS	PM2- PP5- PP3	Not checked	VUS	___	2023-03-08	No	___	SCV001755603
Case465	113261	Mitochondrial myopathy	Solo	whole exome sequencing	Yes	Positive	Female	5 Y	Childhood	Childhood	Onset age: 2-3 years; Difficulty climbing steps; Muscle weakness, lower>upper limbs; Elevated CPK level; EMG-NCV: suggestive of non-inflammatory myopathy; Muscle biopsy: Mitochondrial myopathy; Echocardiography: TR (+). Parental consanguinity, in the presence of family history suspected genetic etiology.	Overlapping	TK2	Missense	Novel	Chr16:66547690G>T	Homozygote	NM_004614.5	c.643C>A	p.Leu215Ile	?Progressive external ophthalmoplegia with mitochondrial DNA deletions, autosomal recessive 3; #MIM617069/AR Mitochondrial DNA depletion syndrome 2 (myopathic type); #MIM 609560/AR	Autosomal Recessive	Likely Pathogenic	___	Not checked	Positive	___	2023-08-15	No	___	___
Case466	113293	CMS	Solo	whole exome sequencing	Yes	Negative	Female	18 Y	Adulthood	Childhood	Onset age: 4-month; Ptosis; Weak cry; Bulbar palsy; Respiratory distress, recurrent; Sudden episodic apnea; Generalized muscle weakness; Hospitalized due to respiratory problem & muscle weakness; Ophthalmoparesis; Strabismus; Negative acetylcholine receptor (AChR) antibody & Anti muscle specific kinase tests; Electrodiagnostic testing: decremental response in several muscles.	Neuromuscular junction disorders	CHRNE	Splicing	Novel	Chr17:4802188T>G	Homozygote	NM_000080.4	c.1327-2A>C	___	"Myasthenic syndrome, congenital, 4A, slow-channel [#MIM:605809] AD, AR ; Myasthenic syndrome, congenital, 4B, fast-channel [#MIM:616324] AR; Myasthenic syndrome, congenital, 4C, associated with acetylcholine receptor deficiency [#MIM:608931] AR" `	Autosomal Recessive	Likely Pathogenic	PVS1- PM2	Not checked	Positive	___	2023-08-13	No	___	___
Case467	113299	CMT	Solo	whole exome sequencing	Yes	Negative	Male	5 Y	Childhood	Childhood	Consanguineous parents, sporadic case, normal intelligence, distal upper and lower muscle pain and parenthesis, tiptoe walking and HSMN or CMT reported in EMG/NCV.	Neuropathies	SH3TC2	Stop gain	Known	Chr5:148406435G>A	Homozygote	NM_024577.4	c.2860C>T	p.Arg954*	Charcot-Marie-Tooth disease, type 4C [#MIM601596] AR, Mononeuropathy of the median nerve, mild [#MIM613353] AD	Autosomal Recessive	Pathogenic	PVS1(VS),PP5(S),PM2(Sup)	Not checked	Positive	PMID: 14574644, 16924012, 18511281, 19272779	2023-05-08	No	___	___
Case468	113343	CMT	Solo	whole exome sequencing	Yes	Positive	Male	54 Y	Adulthood	Adulthood	Consanguineous parents, age of onset four years earlier, muscle crapms, walking and running difficulty, pes cavus, kyphosis,distal lower muscle atrophy, axonal type of sensory-motor polyneuropathy reported in NCV, normal brain MRI.	Neuropathies	MME	Frameshift	Novel	Chr3:154886316T>TG	Heterozygote	NM_007289.4	c.1818dup	p.Trp607Valfs*8	Charcot-Marie-Tooth disease, axonal, type 2T [#MIM617017] AD, AR, Spinocerebellar ataxia 43 [#MIM617018] AD	Autosoaml Dominant	Likely Pathogenic	PVS1(VS),PM2(M)	Not checked	Positive	___	2023-08-08	No	___	___
Case469	113344	Hereditary Neuropathy	Solo	whole exome sequencing	Yes	Negative	Female	27 Y	Adulthood	Adulthood	Consanguineous parents, sporadic case, symptoms started 3 years earlier, neuropathy (paraparesis and paresthesia in distal lower limbs (less in upper extremities), pes cavu ,walking difficulty (steppage gait), severe demyelinating sensory-motor polyneuropathy with secondary axonal loss (HSMN) reported in EMG/NCV.	Neuropathies	SBF2	Missense	Novel	Chr11:9812132T>A	Homozygote	NM_030962.4	c.4669A>T	p.Asn1557Tyr	Charcot-Marie-Tooth disease, type 4B2 [#MIM:604563],AR	Autosomal Recessive	VUS	PM2-PP3	Not checked	VUS	___	2023-07-31	No	___	___
Case470	113507	Congenital myopathy	Solo	whole exome sequencing	No	Negative	Female	37 Y	Adulthood	Not reported	Tip-toe walking in childhood; Lower limb muscle weakness, , proximal>distal; Mild atrophy of muscles, proximal>distal; Elevated CPK; EMG-NCV: myopathic process and negative RNS test; Muscle biopsy (year of-1393): myopathic atrophy of mainly type 1 fibers with some degenerative/regenerative fibers associated with many lobulated fibers and slight fiber type grouping; Muscle biopsy (year of-1394): m…	Negative	___	___	___	___	___	___	___	___	___	Sporadic	___	___	___	Negative	___	2023-08-21	No	___	___
Case471	113514	LGMD	Solo	whole exome sequencing	Yes	Positive	Male	24 Y	Adulthood	Adulthood	Muscular dystrophy, limb-girdle, autosomal recessive 2 [#MIM253601] AR, Miyoshi muscular dystrophy 1 [#MIM254130] AR, Myopathy, distal, with anterior tibial onset [#MIM606768] AR	Dystrophies	DYSF	Missense	Novel	Chr2:71895906A>T	Homozygote	NM_003494.4	c.5363A>T	p.Asp1788Val	Muscular dystrophy, limb-girdle, autosomal recessive 2 [#MIM253601] AR, Miyoshi muscular dystrophy 1 [#MIM254130] AR, Myopathy, distal, with anterior tibial onset [#MIM606768] AR	Autosomal Recessive	VUS	PP3,PM2	Not checked	VUS	___	2023-07-26	No	___	___
Case472	113520	Hereditary Neuropathy	Solo	whole exome sequencing	Yes	Negative	Female	13 Y	Childhood	Childhood	Consanguineous parents, age 14 years, developmental delay(speech delay, standing and walking delay), waddling gait, neuropathy ?, pes cavus, intentional hand tremor, cafe au lait spots, non-documented cardiac block.	Negative	___	___	___	___	___	___	___	___	___	Sporadic	___	___	___	Negative	___	2023-08-16	No	___	___
Case473	113528	LGMD	Solo	whole exome sequencing	Yes	Negative	Female	14 Y	Childhood	Childhood	Consanguineous parents, walking, running and climbing difficulty, proximal upper and lower muscle weakness, lordosis, elevated CPK, myopathy reported in EMG, sacrolemmal labeling of all antibodies (dystrophin, alpha,beta, gamma sarcoglycans and dysferlin) in IHCand muscular dystrophy reported in muscle biopsy.	Dystrophies	CAPN3	Stop gain	Known	Chr15:42701525G>T	Homozygote	NM_000070.3	c.1939G>T	p.Glu647Ter	Muscular dystrophy, limb-girdle, autosomal dominant 4 [#MIM:618129]/ AD ; Muscular dystrophy, limb-girdle, autosomal recessive 1 [#MIM:253600]/ AR	Autosomal Recessive	Pathogenic	PVS1, PM2, PM3	Not checked	Positive	PMID: 17994539; PMID: 17236769	2023-08-15	No	___	SCV001755581
Case474	113535	CMS	Solo	whole exome sequencing	No	Negative	Male	3 Y	Childhood	Childhood	Sporadic case, congenital hypotonia, poor feeding, low speech cry, frog leg postion , hyporeflexia, neuromuscular junction disorder in EMG/NCV.	Negative	___	___	___	___	___	___	___	___	___	Sporadic	___	___	___	Negative	___	2023-08-07	No	___	___
Case475	113542	Hereditary paraplagia	Solo	whole exome sequencing	Yes	Positive	Male	16 Y	Childhood	Childhood	Achilles tendon contracture; Cerebral palsy, diplegic; Spastic paraparesis; Elevated alkaline phosphatase; Unremarkable Brain MRI.	Hereditary Ataxia	SACS	Missense	Novel	Chr13:23904370T>C	Homozygote	NM_014363.6	c.13645A>G	p.Asn4549Asp	Spastic ataxia, Charlevoix-Saguenay type; #MIM 270550/AR	Autosomal Recessive	VUS	PM2, PP3	Not checked	VUS	___	2023-08-14	No	___	___
Case476	113561	CMS	Solo	whole exome sequencing	Yes	Positive	Male	24 Y	Adulthood	Childhood	Fatigable weakness; Muscle weakness, proximal>distal, lower>upper; Difficulty climbing steps; Slightly increased CPK; Increased SGPT; EMG-NCV: significant decrement in some tested muscles, compatible with neuromuscular junction transmission disorders.	Neuromuscular junction disorders	GFPT1	Missense	Novel	Chr2:69597198T>C	Homozygote	NM_002056.4	c.158A>G	p.Asn53Ser	Myasthenia, congenital, 12, with tubular aggregates [#MIM:610542]/AR	Autosomal Recessive	VUS	PM2- BP4	Not checked	VUS	___	2023-08-18	No	___	___
Case477	113670	CMS	Solo	whole exome sequencing	Yes	Negative	Male	25 Y	Adulthood	Not reported	Ptosis, mild, bilateral; Diplopia, following COVID vaccination; Paresis, symmetrical; Lower limb muscle weakness extended to upper limb; Gowers sign; Increased DTR; EMG-NCV: presynaptic neuromuscular junction disorder; Negative anti acetylcholine receptor (AChR) antibody; Hypoproteinemia.	Negative	___	___	___	___	___	___	___	___	___	Sporadic	___	___	___	Negative	___	2023-08-19	No	___	___
Case478	113681	CMS	Solo	whole exome sequencing	Yes	Negative	Female	22 Y	Adulthood	Childhood	Very mild ptosis, unilateral, since 12-year old; No muscle weakness; Anti-Muscle Specific kinase (Anti-MuSK): negative; Acetylcholine Receptor (MuscleAChR) Binding Ab, serum: 0.01; Thoracic CT scan: mostly suggestive of thymus enlargement; SFEMG: Mildly abnormal O.Oculi SFEMG.	Negative	___	___	___	___	___	___	___	___	___	Sporadic	___	___	___	Negative	___	2023-11-08	No	___	___
Case479	113726	ALS	Solo	whole exome sequencing	No	Positive	Male	52 Y	Adulthood	Not reported	Onset age about 46-year; Dysarthria; Bulbar palsy; Functional motor deficit, progressive; Muscle spasm; Muscle weakness; Skeletal muscle atrophy; Gait disturbance; Wheelchair bound since last year; EMG-NCV: definite motor neuron disease, active denervation and reinnervation in bulbar, cervical, thoracic and lumbosacral segments. No parental consanguinity, in the presence of family history suspect…	Negative	___	___	___	___	___	___	___	___	___	Familial	___	___	___	Negative	___	2023-07-31	No	___	___
Case480	200018	SMA	Solo	whole exome sequencing	No	Negative	Male	3 M	Childhood	Childhood	Oligohydramnios; Decreased fetal movement; Mild hypotonia & poor sucking since birth; No head up; Undescended testicles, bilateral; Ambiguous genitalia; Mildly increased SGOT, SGPT and CPK; EMG-NCV: borderline findings of myogenic in some proximal muscles; Scrotal ultrasound: testis in inguinal canal. Non-consanguineous parents.	Negative	___	___	___	___	___	___	___	___	___	Sporadic	___	___	___	Negative	___	2023-10-16	No	___	___
Case481	200062	CMT	Solo	whole exome sequencing	No	Negative	Female	24 Y	Adulthood	Childhood	Onset age: 5-year old; Abnormal gait; Distal lower & upper muscle weakness & atrophy due to neuropathy; Foot drop; Pes cavus; EMG-NCV: chronic severe demyelinating sensorimotor neuropathy.	Neuropathies	GDAP1	Missense	Known	Chr8:75272408T>G	Homozygote	NM_018972.4	c.347T>G	p.Met116Arg	Charcot-Marie-Tooth disease, axonal, type 2K[#MIM: 607831]/AD, AR; Charcot-Marie-Tooth disease, axonal, with vocal cord paresis [#MIM:607706]/AR; Charcot-Marie-Tooth disease, recessive intermediate, A [#MIM:608340]/AR; Charcot-Marie-Tooth disease, type 4A [#MIM:214400]/AR	Autosomal Recessive	Pathogenic	PS3_Supporting, PM1, PM2, PM3_Moderate, PP3_supporting,PP5_Moderate	Not checked	Positive	PMID: 15377708, 25429913,21965300	2023-09-17	Multiplex Ligation Dependent Probe Amplification (MLPA) screening for deletions and duplications in CMT/HNPP region was previously performed in this laboratory for this individual and revealed no Del/Dup in PMP22 gene of this individual.	___	SCV001755211
Case482	200078	LGMD	Solo	whole exome sequencing	Yes	Negative	Female	35 Y	Adulthood	Adulthood	Consanguineous parents, sporadic case, age 35 years, elevated LFT (started 8 yeras earlier), followed by proximal lower muscle weakness, walking difficulty, positive Gower’s sign, lordosis, polymyopathy reported in EMG, muscular dystrophy reported in muscle biopsy, normal sarcolemal labelling (dystrophin, alpha, beta and gamma sarcoglycans and dysferlin)reported in IHC and elevated CPK(4785U/L).	Dystrophies	DYSF	Missense	Known	Chr2:71906223C>T	Homozygote	NM_003494.4	c.5804C>T	p.Pro1935Leu	Muscular dystrophy, limb-girdle, autosomal recessive 2 [#MIM253601] AR, Miyoshi muscular dystrophy 1 [#MIM254130] AR, Myopathy, distal, with anterior tibial onset [#MIM606768]	Autosomal Recessive	VUS	PM2(M),PP3(Sup),PM3(M)	Not checked	VUS	PMID: 31937337, 36672942, 26060040, 31693312	2023-08-15	No	___	___
Case483	200214	CMS	Solo	whole exome sequencing	Yes	Negative	Female	10 Y	Childhood	Childhood	Consanguineous parents, sporadic case, age of onset 7 years, motor development delay (standing and walking), upper and lower muscle weakness, neck muscle weakness, easy fatigability, dyspnea on exertion, lordosis, abdominal protrusion, walking abnormality, normal brain MRI, neuromuscular junction disease(congenital myasthenia) reported in EMG/NCV, MR and TR reported in echocardiography.	Neuromuscular junction disorders	CHRNA1	Missense	Novel	Chr2:175619134C>T	Homozygote	NM_000079.4	c.353G>A	p.Gly118Asp	"Myasthenic syndrome, congenital, 1B, fast-channel [#MIM608930] AD, AR, Myasthenic syndrome, congenital, 1A, slow-channel [#MIM601462] AD, Multiple pterygium syndrome, lethal type [#MIM253290] AR "	Autosomal Recessive	VUS	PM2(M),PP3(M)	Inherited	VUS	___	2023-08-18	No	___	___
Case484	200225	Myopathy	Solo	whole exome sequencing	Yes	Positive	Female	45 Y	Adulthood	Not reported	Consanguineous parents , age of onset 25 years, dysphagia, progressive proximal muscle weakness, respiratory distress, nasal speech,easy fatigability, non irritable myopathy reported in EMG, multiminicore myopathy, excersie intolerance, normal echocardiography,normalCPK.	Negative	___	___	___	___	___	___	___	___	___	Familial	___	___	___	Negative	___	2023-12-10	No	___	___
Case485	200368	Motor neuron disease	Solo	whole exome sequencing	No	Negative	Female	63 Y	Adulthood	Adulthood	Onset since last year; Dysarthria; Difficulty climbing steps; Muscle weakness, lower>upper, Lt.>Rt.; Muscle spasm; Fasciculations; Hemiparesis, unilateral; Spastic gait; EMG-NCV: chronic active bulbar, cervical, thoracic and lumbosacral polyradiculopathy, motor neuropathy; Brain MRI: small vessel vascular disease and multiple high signal foci in both periventricular and subcortical white matter i…	Negative	___	___	___	___	___	___	___	___	___	Sporadic	___	___	___	Negative	___	2023-04-09	No	___	___
Case486	200411	CMT	Solo	whole exome sequencing	Yes	Positive	Female	19 Y	Adulthood	Childhood	Onset age: 12-year old with lower muscle weakness & abnormal gait; Distal lower & upper muscle weakness & atrophy due to neuropathy; Abnormal gait, imbalance; Claw hand deformities; Pes cavus; Foot drop; EMG-NCV: chronic sensorimotor demyelinating polyneuropathy with uniform conduction slowing; CSF protein content increased.	Neuropathies	SBF2	Splicing	Novel	Chr11:9853766C>T	Homozygote	NM_030962.4	c.3652+5G>A	___	Charcot-Marie-Tooth disease, type 4B2 [#MIM:604563]/AR	Autosomal Recessive	VUS	PM2/PP3	Inherited	VUS	___	2023-09-20	Multiplex Ligation Dependent Probe Amplification (MLPA) screening for deletions and duplications in CMT/HNPP region was previously performed in Pars Genome medical genetics clinic for this individual and revealed no Del/Dup in PMP22 gene of this individual.	___	___
Case487	200434	Myopathy	Solo	whole exome sequencing	Yes	Negative	Male	17 Y	Childhood	Childhood	Consanguineous parents, age 17 years, sporadic case, proximal upper and lower muscle weakness , positive Gower’ s sign, running difficulty, elevated CPK. Chronic myopathy reported in EMG/NCV, myopathic atrophy with prominent autophagic vacuoles reported in muscle biopsy, sacrolemmal labelling for all examined antibodies, normal echocardiography, normal brain MRI.	Negative	___	___	___	___	___	___	___	___	___	Sporadic	___	___	___	Negative	___	2023-08-25	No	___	___
Case488	200464	Muscular dystrophy	Solo	whole exome sequencing	Yes	Positive	Male	35 Y	Adulthood	Childhood	Consanguineous parents ,age of onset 16 years,climbing,running and walking difficulty, chronic myopathic disese reported in EMG	Dystrophies	CAPN3	Missense	Known	Chr15:42688999T>C	Homozygote	NM_000070.3	c.1117T>C	p.Trp373Arg	Muscular dystrophy, limb-girdle, autosomal dominant 4 [#MIM:618129]/AD; Muscular dystrophy, limb-girdle, autosomal recessive 1 [#MIM:253600]/AR	Autosomal Recessive	Likely Pathogenic	PP3, PM2, PS4, PS3, PP2	Not checked	Positive	PMID: 18337726, 30564623	2023-12-11	No	___	SCV001755642
Case489	200547	Myopathy	Solo	whole exome sequencing	No	Negative	Male	12 Y	Childhood	Childhood	Onset age: 6-year old; Foot pain; Frequent falls; Muscle weakness, lower>upper, proximal>distal; Muscle atrophy; Joint contracture, knees & elbows; EMG-NCV: myopathic process; Elevated CPK; Wheelchair-bound since 10-year old.	Negative	___	___	___	___	___	___	___	___	___	Sporadic	___	___	___	Negative	___	2023-11-09	No	___	___
Case490	200582	Muscular dystrophy	Solo	whole exome sequencing	Yes	Negative	Female	2 Y	Childhood	Childhood	Motor delay, since 1.5 years old; Reduced eye contact; Muscle weakness, lower > upper limbs; Difficulty rising from seated position; Autistic behavior; Gowers sign; Speech problem; Waddling gait; Normal brain MRI; Normal EMG-NCV; Muscle biopsy: type 1 fibers predominance and atrophy compatible with congenital fiber type disproportion; Increased CPK & Aldolase levels; Increased AST & ALT.	Negative	___	___	___	___	___	___	___	___	___	Sporadic	___	___	___	Negative	___	2023-09-20	No	___	___
Case491	200659	LGMD	Solo	whole exome sequencing	Yes	Negative	Male	28 Y	Adulthood	Adulthood	Onset age: 26-year old; Proximal & distal muscle weakness; Inability to heel & toe-walk; Gowers sign; Difficulty climbing steps; Mild lower muscle atrophy; EMG-NCV: irritable myopathic process; Increased CPK & LDH, ALT & AST levels; Muscle biopsy: slight myopathic atrophy with multiple necrotic and degenerative/regenerative fibers and no endomysial fibrosis compatible with early stage of muscular…	Dystrophies	DYSF	Frameshift	Known	Chr2:71795360A>AC	Homozygote	NM_003494.4	c.2706dupC	p.Lys903Glnfs*4	Miyoshi muscular dystrophy 1 [#MIM:254130]/AR; Muscular dystrophy, limb-girdle, autosomal recessive 2 [#MIM:253601]/AR; Myopathy, distal, with anterior tibial onset [#MIM:606768]/AR	Autosomal Recessive	Pathogenic	PVS1- PM2- PP5	Not checked	Positive	PMID: 22616201; 31693312	2023-09-21	No	___	SCV001755403
Case492	200710	CMS	Solo	whole exome sequencing	Yes	Negative	Female	36 Y	Adulthood	Adulthood	Consanguineous parents, sporadic case, upper and lower muscle weaknesss, proximal muscle cramps, facial weakness, tremor, positive Gower’s sign, fasciculation, neuromuscualr junction disorder reported in EMG/NCV, normal CPK, normal lumbosacral and thoracic MRI, muscle atrophy (suspected to SMA) reported in muscle biopsy (1391), negative acethyl choline receptor antibody	Neuromuscular junction disorders	AGRN	Missense	Novel	Chr1:957797C>T	Homozygote	NM_198576.4	c.418C>T	p.Arg140Trp	Myasthenic syndrome, congenital, 8, with pre- and postsynaptic defects [#MIM615120] AR	Autosomal Recessive	VUS	PM2,PP3(Sup)	Not checked	VUS	___	2023-08-23	Quantitative analysis by Multiplex Ligation Dependent Probe Amplification (MLPA) for exons VII and VIII in SMN1 & SMN2 genes was previously performed in the Novin Medical genetic laboratory for this individual, and revealed one copy of exons 7&8 in SMN2 gene	___	___
Case493	200839	LGMD	Solo	whole exome sequencing	Yes	Positive	Female	32 Y	Adulthood	Adulthood	Consanguineous parents, two affected siblings, age of onset 20 years, muscle weakness, running, walking and climbing difficulty, loss of sarcolemmal labeling with dysferlin antibody reported in IHC ,elevated CPK (7820 U/L), muscular dystrophy reported in muscle biopsy and distal lower muscle atrophy reported in muscle MRI.	Dystrophies	DYSF	Missense	Novel	Chr2:71895885G>A	Homozygote	NM_003494.4	c.5342G>A	p.Gly1781Glu	Miyoshi muscular dystrophy 1 [#MIM:254130],AR; Muscular dystrophy, limb-girdle, Autosomal recessive2[#MIM:253601],AR; Myopathy, distal, with anterior tibial onset[#MIM:606768],AR	Autosomal Recessive	Likely Pathogenic	PM2_moderate,PP3_moderate,PP4_moderate	Not checked	Positive	___	2023-08-16	No	___	___
Case494	200845	Motor neuron disease	Solo	whole exome sequencing	Yes	Positive	Male	35 Y	Adulthood	Adulthood	Consanguineous parents, started 3 years ago, progressive proximal upper and lower muscle weakness, muscle cramp, muscle atrophy, fasciculation, tremor, standing, climbing and walking difficulty, EMG/NCV suggested SMA or ALS and elevated CPK	Negative	___	___	___	___	___	___	___	___	___	Familial	___		___	Negative	___	2024-01-19	Multiplex Ligation Dependent Probe Amplification (MLPA) screening for deletions of exons 7&8 in SMN1 gene was previously performed in this laboratory for this individual which revealed no deletion in this patient	___	___
Case495	200889	Myopathy	Solo	whole exome sequencing	Yes	Negative	Male	52 Y	Adulthood	Childhood	Onset from 17-year ago; Muscle fatigability, in lower limbs; Difficulty walking, Muscle spasm; Fasciculations, intermittent; Hyperlordosis; Limb muscle weakness, lower & upper, distal>proximal, probably due to neuropathy; Lower & upper muscle atrophy, probably due to neuropathy; Gait disturbance; Foot dorsiflexor weakness; Gowers sign; EMG-NCV: chronic severe non-irritable myopathy.	Myopathies	GNE	Missense	Known	Chr9:36236862G>A	Homozygote	NM_001128227.3	c.829C>T	p.Arg277Trp	Nonaka myopathy [#MIM:605820]/AR; Sialuria [#MIM:269921]/AD	Autosomal Recessive	Pathogenic	PM2/PM5/PP5/PP3/PP2/PM3/PS3/PM1	Not checked	Positive	PMID:26231298, 20346669, 29305133,15987957,25986339, 11528398, 25966635, 29480215	2023-09-21	No	___	___
Case496	200906	LGMD	Solo	whole exome sequencing	Yes	Positive	Female	30 Y	Adulthood	Adulthood	Consanguineous parents, multiple patients, age of onset 19 years , proximal lower muscle weakness, walking difficulty, lordosis , axial muscle weakness, myopathic pattern in EMG, myopathic atrophy with fibrosis and fatty replacement reported in muscle biopsy, sarcolemmal labelling for six examined antibodies reported in IHC, and normal CPK	Dystrophies	JAG2	Missense	Novel	Chr14:105613723C>T	Homozygote	NM_002226.5	c.2419G>A	p.Gly807Ser	Muscular dystrophy, limb-girdle, autosomal recessive 27 [#MIM:619566],AR	Autosomal Recessive	VUS	PM2_moderate,PP3_moderate	Not checked	VUS	___	2023-02-09	No	___	___
Case497	200909	Myopathy	Solo	whole exome sequencing	Yes	Negative	Female	25 Y	Adulthood	Adulthood	Consanguineous parents, 25 years, lower distal more than proximal lower muscle weakness started 3-4 months earlier, standing and climbing difficulty, chronic polymyopathy with irritable feature reported in EMG, normal CPK, mild fatty degeneration of gluteus maximus, normal autoimmune laboratory testing, positive CRP and elevated ESR	Negative	___	___	___	___	___	___	___	___	___	Sporadic	___	___	___	Negative	___	2023-05-09	No	___	___
Case498	200922	Hereditary Neuropathy	Solo	whole exome sequencing	No	Negative	Male	5 Y	Childhood	Childhood	Sporadic case, decreased muscle mass of upper and lower extremities, ulnar deviation, scapula winging, pterygium, webbed elbow and small joint contracture, overlapping fingers, club foot, chronic asymmetric axonal neuropathy, lumbar rigid spine	Overlapping	PIEZO2	Missense	Novel	Chr18:10773625A>G	Heterozygote	NM_001378183.1	c.2570T>C	p.Leu857Pro	?Marden-Walker syndrome [MIM#248700] AD; Arthrogryposis, distal, type 3 [MIM#114300] AD; Arthrogryposis, distal, type 5 [MIM#108145] AD; Arthrogryposis, distal, with impaired proprioception and touch [MIM#617146] AR	Autosoaml Dominant	VUS	PM2 PP3	Not checked	VUS	___	2023-07-09	No	___	___
Case499	200933	Motor neuron disease	Solo	whole exome sequencing	Yes	Negative	Male	16 Y	Childhood	Childhood	Consanguineous parents, age 16 years , sporadic case, walking and climbing difficulty, paresthesia in lower limbs and numbness, normal lumbosacral MRI and anterior horn cell damage in L5,S1 reported in EMG/NCV.	Negative	___	___	___	___	___	___	___	___	___	Sporadic	___	___	___	Negative	___	2023-06-09	No	___	___
Case500	201055	Myopathy	Solo	whole exome sequencing	Yes	Negative	Female	8 Y	Childhood	Childhood	Onset age: 3-year old; Muscle weakness, proximal, progressive; Scapular winging; Gowers sign; Increased level of CPK; EMG: myopathic process; Muscle biopsy: muscular dystrophy; IHC: compatible with beta sarcoglycanopathy.	Dystrophies	SGCB	Large CNV deletion	Novel	NC_000002.11g.(?_52899597)_(52899806_?)del	___	NM_000232.5	Exon 2	___	Muscular dystrophy, limb-girdle, autosomal recessive 4 [#MIM: 604286]/AR	___	Likely Pathogenic	CNV	Not checked	Positive	___	2023-09-21	No	Confirmed by MLPA	___
Case501	201066	LGMD	Solo	whole exome sequencing	Yes	Positive	Female	37 Y	Adulthood	Not reported	Consanguineous parents, two affected siblings, proximal lower and less upper muscle weakness started 7 years earlier, positive Gower’s sign , lordosis , walking and climbing difficulty, myopathic atrophy with dystrophic process reported in muscle biopsy , myopathy reported in EMG, elevated CPK and normal IHC for all examined antibodies.	Negative	___	___	___	___	___	___	___	___	___	Familial	___	___	___	Negative	___	2023-11-09	No	___	___
Case502	201194	ALS	Solo	whole exome sequencing	No	Positive	Male	57 Y	Adulthood	Adulthood	Multiple patients, lower muscle weakness statrted three years earlier, muscle cramps and atrophy, fasciculation, spastic gait , motor neuron disease reported in EMG/NCV.	Motor Neuron Disease	SOD1	Missense	Known	Chr21:33039603A>C	Homozygote	NM_000454.5	c.272A>C	p.Asp91Ala	Amyotrophic lateral sclerosis 1 [#MIM:105400],AD,AR; Spastic tetraplegia and axial hypotonia, progressive [#MIM:618598],AR	Autosomal Recessive	Likely Pathogenic	PM1_moderate,PP5_moderate,PM5_supporting,PP2_moderate,BP4,BS1?,PM3?	Not checked	Positive	PMID: 7647793, 20460594, 22264771, 18608106, 10809943, 14506936, 19703565, 11369193, 11284995, 23062701,23280792, 11220750,7655469, 12482932, 16945901, 17420412, 18319614, 19635794, 19703565, 20189984, 22264771, 25509359	2023-06-09	No	___	___
Case503	201261	Hereditary ataxia	Solo	whole exome sequencing	Yes	Negative	Male	21 Y	Adulthood	Childhood	Consanguineous parents, sporadic case, age of onset 8 years, gait difficulty, ataxic gait, strabismus, speech problem, chronic sensorimotor polyneuropathy.	Hereditary Ataxia	SETX	Missense	Novel	Chr9:135211893A>C	Heterozygote	NM_015046.7	c.508T>G	p.Trp170Gly	Spinocerebellar ataxia, autosomal recessive, with axonal neuropathy 2 [#MIM606002] AR, Amyotrophic lateral sclerosis 4, juvenile [#MIM602433] AD	Autosoaml Dominant	VUS	PM2,PP3(Moderate),PP4	Inherited	VUS	___	2023-11-13	Polymerase chain reaction (PCR) and Triplet Primed (TP) PCR analysis of the GAA repeat within intron 1 of the FXN gene was previously performed in this laboratory for this individual and No trinucleotide repeat expansion was observed in the FXN gene.	___	___
Case504	201292	Motor neuron disease	Solo	whole exome sequencing	Yes	Negative	Male	33 Y	Adulthood	Adulthood	Onset age: 31-year old; Myalgia, myoclonus & weakness in Rt. arm, following COVID-infection, progressed to other extremity; EMG-NCV: suggestive of mild form of motor neuron disease with more prominent involvement of right upper limb; Dizziness & confusion, intermittent; Brain MRI: scattered non-specific foci of abnormal high signal intensity in deep white matter of both hemispheres, mostly consid…	Negative	___	___	___	___	___	___	___	___	___	Sporadic	___	___	___	Negative	___	2023-02-10	No	___	___
Case505	201342	Lipid Storage Disease (LSD)	Solo	whole exome sequencing	Yes	Negative	Female	36 Y	Adulthood	Not reported	Consanguineous parents, proximal muscle weakness, facial muscle weakness, lipid storage disease reported in muscle biopsy, normal CPK, myopathy reported in EMG.	Negative	___	___	___	___	___	___	___	___	___	Sporadic	___	___	___	Negative	___	2023-09-23	No	___	___
Case506	201380	Hereditary Neuropathy	Solo	whole exome sequencing	No	Negative	Female	63 Y	Adulthood	Not reported	Sporadic case, distal upper and lower muscle weakness, mild pes cavus, chronic axonal sensorimotor polyneuropathy.	Negative	___	___	___	___	___	___	___	___	___	Sporadic	___	___	___	Negative	___	2023-09-14	No	___	___
Case507	201382	Myopathy	Solo	whole exome sequencing	No	Negative	Female	20 Y	Adulthood	Childhood	Sporadic case, age of onset 12 years, asymmetric distal muscle weakness, mild pes cavus, climbing, running and walking difficulty, rimmed vacuole myopathy reported in muscle biopsy, elevated CPK, chronic irritable myopathy reported in EMG.	Negative	___	___	___	___	___	___	___	___	___	Sporadic	___	___	___	Negative	___	2023-09-14	No	___	___
Case508	201498	CMS	Solo	whole exome sequencing	Yes	Negative	Male	17 Y	Childhood	Childhood	Consanguineous parents, age of onset 6 years, bilateral ptosis, muscle cramps, easy fatigability, motor neuron junction disease reported in EMG/NCV,anti Ach receptor antibody negative	Neuromuscular junction disorders	CHRNE	Missense	Novel	Chr17:4806333A>G	Homozygote	NM_000080.4	c.26T>C	p.Leu9Pro	Myasthenic syndrome, congenital, 4B, fast-channel [#MIM:616324], AR; Myasthenic syndrome, congenital, 4A, slow-channel [#MIM:605809], AD, AR; Myasthenic syndrome, congenital, 4C, associated with acetylcholine receptor deficiency [#MIM: 608931], AR	Autosomal Recessive	Likely Pathogenic	PM2, PP2?, PP3-Moderate, PP4] PM5-Supporting?	Not checked	Positive	___	2023-10-16	No	___	___
Case509	201550	Hereditary Neuropathy	Solo	whole exome sequencing	Yes	Negative	Male	54 Y	Adulthood	Adulthood	Age of onset 49 years, distal lower and less upper neuropathy with numbness and sensory involvement, pes cavus, sensorimotor axonal polyneuropathy reported in NCV.	Myopathies	TIA1	Missense	Novel	Chr2:70442592C>T	Heterozygote	NM_022173.4	c.799G>A	p.Val267Ile	Amyotrophic lateral sclerosis 26 with or without frontotemporal dementia[#MIM:619133];AR, Welander distal myopathy [#MIM:604454],AD,AR	Autosoaml Dominant	VUS	PM2	Not checked	VUS	___	2023-09-18	No	___	___
Case510	201645	SMA	Solo	whole exome sequencing	No	Negative	Female	43 Y	Adulthood	Not reported	Lower muscle weakness due to neuropathy; Scoliosis; Movement disorder; Impaired toe-walking ability; Hx of hypotonia at 18-month age (suspicious of muscular dystrophy); EMG-NCV: chronic ant. horn cell disease. Non-Consanguineous Parents.	Negative	___	___	___	___	___	___	___	___	___	Sporadic	___	___	___	Negative	___	2023-09-10	Multiplex Ligation Dependent Probe Amplification (MLPA) screening for deletions of SMN1 gene was previously performed in this laboratory for this individual which revealed no deletion in this patient.	___	___
Case511	201690	LGMD	Solo	whole exome sequencing	Yes	Negative	Male	19 Y	Adulthood	Childhood	Onset age: 7-year old with lower muscle weakness; Foot drop; Lower & upper muscle weakness & atrophy; Abnormal gait; Scoliosis; Oligodactyly, unilateral; Gowers sign; Elevated CPK; Wheelchair-bound since 12-year old; EMG-NCV: compatible with myopathic process with spontaneous activity. Consanguineous parents.	Dystrophies	SGCA	Splicing	Novel	Chr17:48246619A>C	Homozygote	NM_000023.4	c.747+4A>C	___	Muscular dystrophy, limb-girdle, autosomal recessive 3 [#MIM:608099]/AR	Autosomal Recessive	VUS	PM2_Moderate/PP3_Moderate	Not checked	VUS	___	2023-02-10	No	___	___
Case512	201769	Mitochondrial myopathy	Solo	whole exome sequencing	Yes	Negative	Female	36 Y	Adulthood	Childhood	Onset age of myopathy: 14-15 year old with easy fatigability; Inability to run & climb steps; Gait ataxia; Upper & lower muscle atrophy; Thenar & hypothenar muscle atrophy; Foot dorsiflexor weakness; Megaloblastic anemia since 3-month ago; Gowers sign; EMG-NCV: chronic myopathic process; Elevated LDH; Increased ferritin level. Hx of stem cells injection	Overlapping	PUS1	Frameshift	Novel	Chr12:132426105delC	Homozygote	NM_025215.6	c.813delC	p.Phe272Leufs*10	Myopathy, lactic acidosis, and sideroblastic anemia 1; #MIM600462/AR	Autosomal Recessive	Pathogenic	PM2, PVS1, PP5	Inherited	Positive	___	2023-02-10	No	___	___
Case513	201799	Hereditary Neuropathy	Solo	whole exome sequencing	No	Negative	Male	58 Y	Adulthood	Childhood	Sporadic case, age 58 years, history of acute flaccid paralysis at age 7 years, climbing , walking and running difficulty, pes cavus, speech impairment (recently), vertigo episodes , mood disturbance ,chronic axonal sensorimotor neuropathy, mild chronic axonal neuropathy reported in nerve biopsy, normal brain MRI, L3-L5 lumbar bulging in lumbosacral spinal MRI.	Negative	___	___	___	___	___	___	___	___	___	Sporadic	___	___	___	Negative	___	2023-08-27	No	___	___
Case514	201890	ALS	Solo	whole exome sequencing	No	Negative	Female	53 Y	Adulthood	Not reported	Sporadic case, age 53 years, age of onset 3 years earlier, distal upper and lower muscle weakness, facial weakness, dysarthria ,bulbar dysfunction, sleep apnea, dysphagia, fasciculation, hyperreflexia, active motor neuron disease reported in EMG/NCV, normal spirometry , microvascular ischemic changes reported in brain MRI.	Negative	___	___	___	___	___	___	___	___	___	Sporadic	___	___	___	Negative	___	2023-09-26	No	___	___
Case515	201900	Hereditary Neuropathy	Solo	whole exome sequencing	No	Negative	Male	69 Y	Adulthood	Not reported	Sporadic case, distal muscle weakness, pes cavus, distal numbness, walking difficulty, foot drop, chronic axonal sensorimotor poly neuropathy reported in EMG.	Negative	___	___	___	___	___	___	___	___	___	Sporadic	___	___	___	Negative	___	2023-09-17	No	___	___
Case516	201901	CMT	Solo	whole exome sequencing	No	Negative	Female	65 Y	Adulthood	Not reported	Age 65 years, neuropathy, muscle weakness , numbness and negative MLPA result for PMP22.	Neuropathies	PMP22	Missense	Novel	Chr17:15163977G>T	Heterozygote	NM_000304.4	c.68C>A	p.Thr23Lys	?Neuropathy, inflammatory demyelinating [#MIM:139393],?AD; Charcot-Marie-Tooth disease, type 1A [#MIM:118220], AD;Charcot-Marie-Tooth disease, type 1E [#MIM:118300],AD; Dejerine-Sottas disease[#MIM:145900],AD, AR;Neuropathy, recurrent, with pressure palsies [#MIM:162500],AD;Roussy-Levy syndrome [#MIM:180800],AD	Autosoaml Dominant	Likely Pathogenic	PM1,PM2,PM5,PP3,PP5	Not checked	Positive	___	2023-10-16	No	___	___
Case517	201991	Myopathy	Solo	whole exome sequencing	Yes	Negative	Female	25 Y	Adulthood	Childhood	Consanguineous parents, sporadic case, age of onset 11 years, lower muscle weakness, abnormal gait, mild lordosis, normal CPK and myopathy changes reported in EMG	Dystrophies	DYSF	Splicing	Novel	Chr2:71900503C>T	Heterozygote	NM_003494.4	c.5668-824C>T	___	Miyoshi muscular dystrophy 1 [#MIM:254130],AR ; Muscular dystrophy, limb-girdle, autosomal recessive 2 [#MIM:253601],AR; Myopathy, distal, with anterior tibialonset,[#MIM:606768],AR	Autosomal Recessive	Pathogenic	PP5_strong,PM2_moderate,PM3?,PS3??	Not checked	Unclear	___	2023-03-10	No	___	___
Case518	202011	CMT	Solo	whole exome sequencing	Yes	Positive	Male	43 Y	Adulthood	Not reported	Onset: 21-year ago with neuropathy in Lt. lower limb; EDX: chronic mild sensorimotor symmetric distal axonal polyneuropathy.	Negative	___	___	___	___	___	___	___	___	___	Familial	___	___	___	Negative	___	2023-10-19	No	___	___
Case519	202012	LGMD	Solo	whole exome sequencing	Yes	Positive	Female	32 Y	Adulthood	Adulthood	Consanguineous parents, climbing difficulty, positive Gower’s sign, lordosis, proximal muscle weakness, and irritable myopathic process reported in EMG, chronic myopathic atrophy and dystrophic pattern reported in muscle biopsy, IHC reported sarcolemmal labelling for all examined antibodies, elevated CPK and normal echocardiography.	Dystrophies	DYSF	Missense	Novel	Chr2:71797810G>A	Homozygote	NM_003494.4	c.3113G>A	p.Arg1038Gln	Miyoshi muscular dystrophy 1 [#MIM:254130],AR; Muscular dystrophy, limb-girdle, autosomal recessive 2 [#MIM:253601],AR;Myopathy, distal, with anterior tibial onset [#MIM:606768],AR	Autosomal Recessive	Likely Pathogenic	PM2,PP3,PP5_strong	Not checked	Positive	___	2023-09-29	No	___	___
Case520	202033	Myopathy	Solo	whole exome sequencing	No	Negative	Male	44 Y	Adulthood	Adulthood	Onset: 4-5 years ago with numbness of big toe; Muscle weakness, distal > proximal, Lt. > Rt. side; Inability to heel & toe walking; Myalgia; Difficulty walking; Bilateral pes cavus; Muscle biopsy: slight mixed chronic myogenic & neurogenic atrophic changes with slight increased internalized nuclei and fiber type grouping; EMG-NCV: compatible with chronic bilateral distal myopathic process (Lt. >R…	Negative	___	___	___	___	___	___	___	___	___	Sporadic	___	___	___	Negative	___	2023-10-19	No	___	___
Case521	202043	LGMD	Solo	whole exome sequencing	Yes	Positive	Male	22 Y	Adulthood	Childhood	Onset age:14-15 year old with difficulty rising from seated position & climbing steps; Muscle weakness & atrophy, lower>upper, proximal>distal; Wheel-chair bound.	Dystrophies	DMD	Large CNV deletion	Novel	NC_000023.10g.(?_32862890)_(32867947_?)del	___	NM_004006.3	Exon 3-4	___	Duchenne muscular dystrophy, [#MIM: 310200]/XLR Becker muscular dystrophy, [#MIM: 300376]/XLR Cardiomyopathy, dilated, 3B, [#MIM: 302045]/XL	___	VUS	CNV	Not checked	VUS	___	2023-10-23	No	No	___
Case522	202062	Hereditary ataxia	Solo	whole exome sequencing	No	Positive	Male	65 Y	Adulthood	Adulthood	Onset age: 59-year old; Imbalance; Nasal speech; Speech impairment; Swallowing difficulty; Impaired tandem walking; Ataxic gait; Generalized muscle atrophy; Hx of Unexplained weight loss; Hearing impairment since 10-year ago.	Hereditary Ataxia	CACNA1A	Missense	Novel	Chr19:13410129A>G	Heterozygote	NM_001127221.2	c.2321T>C	p.Val774Ala	Developmental and epileptic encephalopathy 42 [#MIM:617106] AD; Episodic ataxia, type 2 [#MIM:108500] AD; Migraine, familial hemiplegic, 1 [#MIM:141500] AD; Migraine, familial hemiplegic, 1, with progressive cerebellar ataxia [#MIM:141500] AD; Spinocerebellar ataxia 6 [MIM:183086] AD	Autosoaml Dominant	VUS	PM2	Not checked	VUS	___	2023-12-10	No	___	___
Case523	202100	Myopathy	Solo	whole exome sequencing	Yes	Positive	Female	14 Y	Childhood	Childhood	Consanguineous parents, age 14 years, age of onset 7 years affected deceased mother (Suspected to muscular dystrophy or polymyositis), standing, climbing and running difficulty, positive Gower’s sign, muscular dystrophy reported in muscle biopsy. Normal EMG, normal echocardiography, negative IHC report for all examined antibodies, slightly elevated CPK, calf atrophy in muscle MRI.	Dystrophies	GMPPB	Missense	Known	Chr3:49760132G>A	Homozygote	NM_021971.4	c.458C>T	p.Thr153Ile	Muscular dystrophy-dystroglycanopathy (congenital with brain and eye anomalies), type A, 14 [#MIM615350] AR; Muscular dystrophy-dystroglycanopathy (congenital with impaired intellectual development), type B, 14 [#MIM615351] AR; Muscular dystrophy-dystroglycanopathy (limb-girdle), type C, 14 [#MIM615352] AR	Autosomal Recessive	Likely Pathogenic	PM2,PP3,PP5(Strong),PM3	Not checked	Positive	PMID: 30126629, 30257713, 31953240, 31378432, 28914264, 25681410	2023-10-17	No	___	SCV001167077.1
Case524	202125	CMS	Solo	whole exome sequencing	Yes	Positive	Female	21 Y	Adulthood	Childhood	Ptosis, bilateral, since 3-month age; Progressive proximal weakness, lower & upper limbs; Weakness of facial musculature, mild; Gait disturbance; Hirsutism; Irregular menstruation; Delayed breast growth; Gowers sign; Decreased proximal muscle force; EMG-NCV: nonirritable myopathic changes; Muscle biopsy: mild myopathic atrophy with significant type 1 predominance and selective type 2 atrophy sugg…	Neuromuscular junction disorders	CHRNE	Stop gain	Novel	Chr17:4802367C>A	Homozygote	NM_000080.4	c.1255G>T	p.Glu419Ter	Myasthenic syndrome, congenital, 4A, slow-channel; #MIM 605809/AD,AR Myasthenic syndrome, congenital, 4B, fast-channel; #MIM 616324/AR Myasthenic syndrome, congenital, 4C, associated with acetylcholine receptor deficiency; #MIM608931/AR	Autosomal Recessive	Pathogenic	PM2, PVS1, PP5	Not checked	Positive	___	2023-08-28	No	___	___
Case525	202228	Myopathy	Solo	whole exome sequencing	No	Negative	Male	13 Y	Childhood	Childhood	Sporadic case, age of onset 10 years, proximal lower and upper muscle weakness, fatigability, ptosis, dilated cardiomyopathy reported in echocardiography, lymphadenopathy, and irritable myopathy process with some myotonic discharge in EMG, glycogen storage myopathy reported in muscle biopsy and sarcolemmal labelling for all examined antibodies reported in IHC	Myopathies	RBCK1	Frameshift	Known	Chr20:408036A>AT	Homozygote	NM_031229.4	c.1111dup	p.Cys371Leufs*13	Polyglucosan body myopathy 1 with or without immunodeficiency [#MIM615895] AR	Autosomal Recessive	Pathogenic	___	Not checked	Positive	PMID: 23889995	2023-09-29	No	___	___
Case526	202238	ALS	Solo	whole exome sequencing	No	Negative	Female	38 Y	Adulthood	Not reported	Sporadic case, spastic gait started 4 years earlier, positive Gower’s sign, muscle cramp, fasciculation, active motor neuron disease reported in EMG/NCV.	Negative	___	___	___	___	___	___	___	___	___	Sporadic	___	___	___	Negative	___	2023-10-22	No	___	___
Case527	202268	ALS	Solo	whole exome sequencing	No	Negative	Male	33 Y	Adulthood	Adulthood	Onset: 13-month ago; Abnormal gait, spastic; Muscle weakness & atrophy; Fasciculation; Spasticity; Hyperreflexia; Positive Gowers sign; Increased DTR; VEP test: electrical evidence of bilateral demyelination of the optic nerve; EMG-NCV: suggestive of UMN lesion.	Motor Neuron Disease	CHMP2B	Missense	Novel	Chr3:87294924A>G	Heterozygote	NM_014043.4	c.187A>G	p.Lys63Glu	Frontotemporal dementia and/or amyotrophic lateral sclerosis 7 [#MIM:600795]/AD	Autosoaml Dominant	VUS	BS2_Supporting/PP3_Moderate	Not checked	VUS	___	2023-10-16	No	___	___
Case528	202277	Metabolic myopathy	Solo	whole exome sequencing	Yes	Negative	Male	38 Y	Adulthood	Childhood	Consanguineous parents, age of onset 3 years, hepatomegaly, generalized muscle weakness, positive Gower’s sign , elevated liver enzymes, elevated CPK and myopathy reported in EMG.	Myopathies	AGL	Frameshift	Known	Chr1:100376380CAG>C	Homozygote	NM_000642.3	c.3816_3817delAG	p.Gly1273Asnfs*18	Glycogen storage disease IIIa [#MIM:232400],AR; Glycogen storage disease IIIb [#MIM:232400],AR	Autosomal Recessive	Pathogenic	PVS1,PM2,PM3,PP5	Not checked	Positive	PMID:10982190,PMID: 10982190, 31028654	2023-02-10	No	___	___
Case529	202298	LGMD	Solo	whole exome sequencing	Yes	Negative	Female	34 Y	Adulthood	Adulthood	Onset age: 20-year old with lower muscle weakness & abnormal gait; Muscle weakness, lower>upper, proximal>distal; Waddling gait; Gowers sign; EMG-NCV: compatible with a myopathic process with spontaneous activity (irritable myopathy); Muscle biopsy: early stage of muscular dystrophy; Increased CPK. Consanguineous parents.	Dystrophies	CAPN3	Missense	Known	Chr15:42691843C>A	Homozygote	NM_000070.3	c.1347C>A	p.Asn449Lys	Muscular dystrophy, limb-girdle, autosomal dominant 4 [#MIM:618129]/AD; Muscular dystrophy, limb-girdle, autosomal recessive 1 [#MIM:253600]/AR	Autosomal Recessive	Likely Pathogenic	PM1,PM2,PP3_Moderate,PM3_supporting,PP2?	Not checked	Positive	PMID: 32528171, 33250842	2023-09-30	No	___	___
Case530	202331	ALS	Solo	whole exome sequencing	Yes	Positive	Male	66 Y	Adulthood	Adulthood	Onset age: 64-year old; Muscle weakness, extended from lower to upper limbs, lower>upper; Difficulty rising from seated position; Muscle atrophy; Imbalance; Dizziness; Speech problem; Dysarthria; Dysphagia, intermittent; Ataxia; EMG-NCV: early stage of MND. Consanguineous parents.	Hereditary Paraplegia	KIF5A	Splicing	Known	Chr12:57976413G>A	Heterozygote	NM_004984.4	c.3020+1G>A	___	{Amyotrophic lateral sclerosis, susceptibility to, 25} [#MIM:617921]/AD; Myoclonus, intractable, neonatal [#MIM:617235]/AD; Spastic paraplegia 10, autosomal dominant [#MIM:604187]/AD	Autosoaml Dominant	Likely Pathogenic	PVS1_strong,PM2,PP5	Not checked	Positive	PMID: 29342275, 29566793, 32815063	2023-10-14	No	___	___
Case531	202340	Congenital myopathy	Solo	whole exome sequencing	Yes	Negative	Female	55 Y	Adulthood	Not reported	Consanguineous parents, generalized muscle weakness, respiratory distress, walking,climbing and running difficulty started chilhood , severe hypotonia, severe weight loss, myopathic changes reported in EMG,chronic myopathic atrophy reported in muscle biopsy and normal CPK.	Myopathies	NEB	Frameshift	Novel	Chr2:152354159T>TTGTG	Homozygote	NM_001271208.2	c.24382_24385dup	p.Asn8129Thrfs*7	"Arthrogryposis multiplex congenita 6 [#MIM:619334]/ AR ; Nemaline myopathy 2, autosomal recessive [#MIM:256030]/ AR"	Autosomal Recessive	Likely Pathogenic	PVS1 PM2 PP5	Not checked	Positive	___	2023-12-10	No	___	___
Case532	202391	LGMD	Solo	whole exome sequencing	Yes	Negative	Female	23 Y	Adulthood	Adulthood	Onset: 2- year ago; Difficulty walking, running & climbing steps; Generalized muscle weakness; Muscle cramps; Lordosis; Difficulty rising from seated position; Difficulty to heel walking; Flat feet; Increased CK & Aldolase levels; Muscle biopsy: myopathic atrophy, fibrosis & fat replacement, suggestive of dystrophic process; Echocardiography: mild TR & MR; Spirometry: mild restrictive; EDX: non-i…	Dystrophies	CAPN3	Inframe deletion	Known	Chr15:42681287CCATTGA>C	Homozygote	NM_000070.3	c.795_800del	p.Ile266_Asp267del	Muscular dystrophy, limb-girdle, autosomal dominant 4 [#MIM:618129]/AD; Muscular dystrophy, limb-girdle, autosomal recessive 1 [#MIM:253600]/AR	Autosomal Recessive	Likely Pathogenic	PM1,PM2,PM4,PP5,PM3	Not checked	Positive	PMID:27020652	2023-10-16	No	___	SCV000240232
Case533	202397	Hereditary Neuropathy	Solo	whole exome sequencing	Yes	Negative	Female	4 Y	Childhood	Childhood	Consanguineous parents, sporadic case, age 4 years, age of onse7 months, walking with assistance (brace) at age 3 years	Motor Neuron Disease	IGHMBP2	Splicing	Novel	Chr11:68675806G>T	Homozygote	NM_002180.3	c.449+1G>T	___	"Charcot-Marie-Tooth disease, axonal, type 2S [#MIM:616155]/ AR; Neuronopathy, distal hereditary motor, type VI [#MIM:604320]/ AR"	Autosomal Recessive	Pathogenic	PVS1 PM2 PM3	Not checked	Positive	___	2023-10-17	No	___	SCV001167085.1
Case534	202469	Mitochondrial myopathy	Solo	whole exome sequencing	Yes	Negative	Female	27 Y	Adulthood	Childhood	Short stature; Sensorineural hearing impairment; Upper & Lower limb muscle weakness, proximal>distal; Waddling gait; Gowers sign; Hypothyroidism; EMG-NCV: myopathic pattern; Muscle biopsy: Mitochondrial myopathy; Echocardiography: moderate TR.	Myopathies	BIN1	Large CNV deletion	Novel	Chr2:127828335-127828394	___	NM_139343.3	Exon 3	___	Centronuclear myopathy 2; #MIM255200/AR	___	Likely Pathogenic	CNV	Not checked	VUS	___	2023-08-31	No	No	___
Case535	202512	ALS	Trio	whole exome sequencing	Yes	Negative	Male	20 Y	Adulthood	Childhood	Cyanosis at birth due to asphyxiation; Global developmental delay; Cerebral palsy; Seizure; Speech problem; Staring gaze; Open mouth; Sialorrhea	Negative	___	___	___	___	___	___	___	___	___	Sporadic	___	___	___	Negative	___	2024-02-04	___	___	___
Case536	202528	CMS	Solo	whole exome sequencing	Yes	Negative	Male	14 Y	Childhood	Childhood	Consanguineous parents, sporadic case, age 13 years, easy fatigability, muscle weakness, frequent falling, dysphagia, FTT, climbing and running difficulty, ptosis, slightly elevated CPK, mild myopathic pattern and decremental response in EMG/NCV, acetylcholine receptor antibody<0.3 mmol/l.	Neuromuscular junction disorders	CHRNE	Frameshift	Known	Chr17:4802185TC>T	Homozygote	NM_000080.4	c.1327del	p.Glu443Lysfs*64	Myasthenic syndrome, congenital, 4A, slow-channel [#MIM605809] AD, AR; Myasthenic syndrome, congenital, 4B, fast-channel [#MIM616324] AR; Myasthenic syndrome, congenital, 4C, associated with acetylcholine receptor deficiency [#MIM608931] AR	Autosomal Recessive	Pathogenic	PVS1(Strong), PP5,PM2(Supporting),PS3(Supporting),PM3(Strong)	Not checked	Positive	PMID: 9668239, 10496269, 10514102, 10534268, 27634344	2023-10-18	No	___	___
Case537	202531	Anterior horn cell disease	Solo	whole exome sequencing	Yes	Negative	Female	22 Y	Adulthood	Adulthood	Age of onset 4 years ago, frequent falling, running and climbing difficulty, chronic anterior horn cell disease reported in EMG/NCV, exercise intolerance, genu valgus and elevated CPK	Motor Neuron Disease	SPG11	Frameshift	Novel	chr15:44890977:A:AGGTAG	Homozygote	NM_025137.4	c.3743_3744insCTACC	p.Ser1249Tyrfs*4	Amyotrophic lateral sclerosis 5, juvenile [#MIM602099] AR; Charcot-Marie-Tooth disease, axonal, type 2X [#MIM616668] AR; Spastic paraplegia 11, autosomal recessive [#MIM604360] AR	Autosomal Recessive	Likely Pathogenic		Not checked	Positive	___	2024-01-14	___	___	___
Case538	202592	CMT	Solo	whole exome sequencing	Yes	Negative	Male	15 Y	Childhood	Childhood	Consanguineous parents, age 15 years, hoarseness, Charcot-Marie-Tooth.	Neuropathies	MTMR2	Frameshift	Novel	Chr11:95583026CCT>C	Homozygote	NM_016156.6	c.805-2_805-1del	___	Charcot-Marie-Tooth disease, type 4B1 [#MIM601382] AR	Autosomal Recessive	Likely Pathogenic	PVS1(Strong),PM2(Moderate)	Not checked	Positive	___	2023-10-15	No	___	___
Case539	202668	LGMD	Solo	whole exome sequencing	Yes	Negative	Female	20 Y	Adulthood	Childhood	Consanguineous parents, sporadic case , age of onset 17 years, proximal lower muscle weakness, lordosis, positive Gower’s sign, walking difficulty, muscular dystrophy reported in muscle biopsy, non-irritable myopathic process reported in EMG, elevated CPK, sarcolemmal labeling for all examined antibodies reported in IHC ,fatty replacement in thigh muscles reported in muscle MRI.	Dystrophies	CAPN3	Splicing	Known	Chr15:42684835A>G	Homozygote	NM_000070.3	c.946-2A>G	___	Muscular dystrophy, limb-girdle, autosomal dominant 4 [#MIM: 618129], AD, and Muscular dystrophy, limb-girdle, autosomal recessive 1 [#MIM: 253600], AR	Autosomal Recessive	Pathogenic	PVS1_ST, PM2_M, PP5_M	Not checked	Positive	PMID: 15689361, 18055493, and 27363342	2023-10-26	No	___	SCV001755207
Case540	202692	Hereditary paraplagia	Solo	whole exome sequencing	Yes	Positive	Female	19 Y	Adulthood	Childhood	Consanguineous parents, age of onset three years earlier with spastic gait, lower limb weakness and spasticity, dysarthria, pes cavus, neurogenic pattern with motor neuron disease reported in EMG/NCV	Overlapping	SPG11	Frameshift	Known	Chr15:44905697C>CT	Homozygote	NM_025137.4	c.3075dup	p.Glu1026Argfs*4	Amyotrophic lateral sclerosis 5, juvenile [#MIM: 602099] / AR Charcot-Marie-Tooth disease, axonal, type 2X [#MIM: 616668] / AR Spastic paraplegia 11, autosomal recessive [#MIM: 604360] / AR	Autosomal Recessive	Pathogenic	PVS1, PM2, PP5, PM3	Not checked	Positive	PMID: 18067136, 19105190, 19194956, 20110243, 27071356, 27084228, 28991695	2023-05-11	No	___	SCV001755384
Case541	202769	Myopathy	Solo	whole exome sequencing	Yes	Negative	Female	66 Y	Adulthood	Childhood	Muscle weakness, lower>upper limb, since 7-8 years old; Mild lower & upper muscle weakness, proximal > distal; Elevated SGOT, SGPT, CPK & LDH; EMG-NCV: proximal>distal polymyopathy with mild irritative feature.	Myopathies	ETFDH	Missense	Known	chr4:159627421C>T	Homozygote	NM_004453.4	c.1366C>T	p.Pro456Ser	Glutaric acidemia IIC [#MIM:231680]/AR	Autosomal Recessive	Likely Pathogenic	PM2/PP3/PM5/PM1/PM3	Not checked	Positive	PMID:35309592, 27038534, and 26403312	2023-11-02	No	___	___
Case542	202805	Muscular dystrophy	Solo	whole exome sequencing	Yes	Negative	Male	14 Y	Childhood	Childhood	Consanguineous parents, sporadic case, age 14 years, muscle weakness and walking difficulty started first year,, severe proximal and distal muscle wasting and normal intelligence.	Dystrophies	FKTN	Missense	Novel	Chr9:108366653T>C	Homozygote	NM_001079802.2	c.527T>C	p.Phe176Ser	Cardiomyopathy, dilated, 1X [#MIM:611615]/ AR; Muscular dystrophy-dystroglycanopathy (congenital with brain and eye anomalies), type A,4 [#MIM:253800]/ AR; Muscular dystrophy-dystroglycanopathy (congenital without mental retardation), type B, 4 [#MIM:613152]/ AR; Muscular dystrophy-dystroglycanopathy (limb-girdle), type C, 4 [#MIM:/611588]/ AR.	Autosomal Recessive	Likely Pathogenic	PM3 PM2 PP3	Inherited	Positive	___	2023-07-11	No	___	___
Case543	202913	CMS	Solo	whole exome sequencing	Yes	Positive	Male	28 Y	Adulthood	Childhood	Onset from 10-year ago with bilateral ptosis & muscle weakness; Facial weakness; Mild bulbar muscle weakness; Proximal & neck extensor muscle weakness, lower & upper; Negative acetylcholine receptor antibody & anti Musk Ab; Elevated LDH, CPK & Aldolase; Muscle biopsy: type 2 fibers atrophy with rare necrotic fibers; EMG-NCV: in the low frequency repetitive nerve stimulation in favor of post-synap…	Neuromuscular junction disorders	DOK7	Frameshift	Known	Chr4:3494833A>AGCCT	Homozygote	NM_173660.5	c.1124_1127dup	p.Ala378Serfs*30	Fetal akinesia deformation sequence 3 [#MIM: 618389]/AR; Myasthenic syndrome, congenital, 10 [#MIM: 254300]/AR	Autosomal Recessive	Pathogenic	PVS1_strong,PM2,PM3_very strong,PP5	Not checked	Positive	PMID: 16917026, 17452375, 18626973, 20012313, 20458068, 22661499, 23219351, 23790237	2023-10-22	No	___	___
Case544	202958	CMS	Solo	whole exome sequencing	No	Positive	Female	33 Y	Adulthood	Not reported	Bilateral ptosis; Proximal lower & upper muscle weakness; Gowers sign; EMG-NCV: evidence of repetitive CMAP, congenital myasthenic syndrome, slow channel syndrome, or Endplate AChE deficiency.	Neuromuscular junction disorders	CHRNA1	Missense	Known	Chr2:175618970C>T	Heterozygote	NM_000079.4	c.517G>A	p.Gly173Ser	Multiple pterygium syndrome, lethal type [#MIM:253290]/AR; Myasthenic syndrome, congenital, 1A, slow-channel [#MIM:601462]/AD; Myasthenic syndrome, congenital, 1B, fast-channel [#MIM:608930]/AD, AR	Autosoaml Dominant	Likely Pathogenic	PS4/PM2/PP3?	Not checked	Positive	PMID: 29054425, 7619526	2023-05-11	No	___	___
Case545	202959	Muscular dystrophy	Solo	whole exome sequencing	Yes	Negative	Male	39 Y	Adulthood	Not reported	Consanguineous parents, sporadic case, walking delay, lower muscle weakness , waddling gait , positive Gower’s sign, chronic non-irritable myopathy reported in EMG, elevated CPK, fatty degeneration in vastus lateralis, medialis and intermedius in favor of myopathy reported in muscle MRI, negative Pompe testing,	Myopathies	ADSSL1	Missense	Known	Chr14:105207556G>A	Homozygote	NM_152328.5	c.769G>A	p.Ala257Thr	Myopathy, distal, 5 [#MIM617030]/AR	Autosomal Recessive	Likely Pathogenic	PM2,PP3_supporting,PP5	Not checked	Positive	PMID:32331917	2023-11-20	No	___	___
[truncated: 994 more rows]

## Sheet: Table2
Table 2. Number of genes identified among individuals of our study. This table also provided the number of identified variants, variants types, novel and Known variants, and zygosity of variants in each gene. Moreover the number of individual based on "disease-onset age" groups (childhood [under the 18 years], adulthood [18 and over 18 years], an d not reported] for each gene is included.
[truncated: 169 more rows]
